# Supplementary material
Source: PubMed Central journal article supplement (PMC4771193)
Supplement: NIHMS756314-supplement-SI.pdf [file NIHMS756314-supplement-SI.pdf]

# CHEMISTRY

## A **European** Journal

### Supporting Information

#### **$\alpha$ -Amino Acid-Isosteric $\alpha$ -Amino Tetrazoles**

Ting Zhao,<sup>[a]</sup> Katarzyna Kurpiewska,<sup>[b]</sup> Justyna Kalinowska-Tłuścik,<sup>[b]</sup> Eberhardt Herdtweck,<sup>[c]</sup>  
and Alexander Dömling\*<sup>[a]</sup>

chem\_201504520\_sm\_miscellaneous\_information.pdf

# Supporting Information

## Contents

|                                                                                                            |           |
|------------------------------------------------------------------------------------------------------------|-----------|
| <b>1. Experimental Procedure and Characterization of Uncommercially Available Starting Materials .....</b> | <b>2</b>  |
| <b>2. Spectra of Products (<sup>1</sup>H NMR, <sup>13</sup>C NMR Spectra and MS) .....</b>                 | <b>11</b> |
| <b>3. Single Crystal X-Ray Structure Determination of Compounds 5a and 5j ...</b>                          | <b>88</b> |
| <b>4. Single Crystal X-Ray Structure Determination of Compound 5l .....</b>                                | <b>91</b> |

# 1. Experimental Procedure and Characterization of Uncommercially Available Starting Materials

## Methyl 4-oxobutanoate (10)

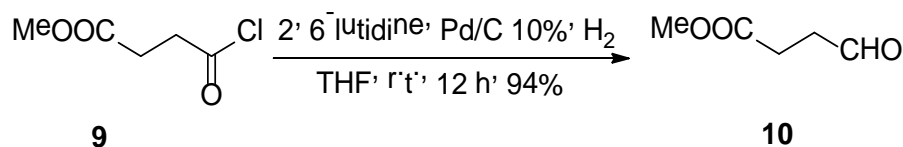

Methyl 4-chloro-4-oxobutanoate (**9**) (4.2 ml, 33.2 mmol) was dissolved in THF (82 ml) and was degassed with N<sub>2</sub> for 5 min. Then 2, 6-lutidine (3.9 ml, 33.5 mmol) and 10% palladium on carbon (350 mg) were added. The reaction mixture stirred for overnight under H<sub>2</sub>. The reaction mixture was filtered through a Celite pad. The filtrate was concentrated under reduced pressure. The product was yellow liquid (3.2 g, 94%). It was used directly in the next step without further purification.

## *tert*-Butyl (5-hydroxypentyl)carbamate (**12**)

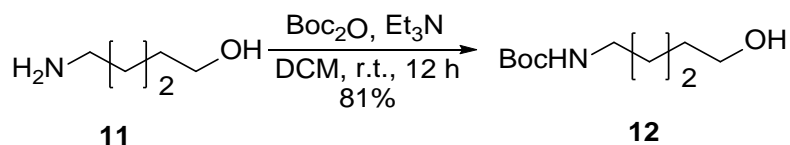

5-Aminopentan-1-ol (**11**) (2 g, 19 mmol) was dissolved in 15 ml CH<sub>2</sub>Cl<sub>2</sub> in a 100 ml round-bottomed flask equipped with a magnetic stirring egg and a pressure equalizing addition funnel and was cooled down to 0°C under ice and water bath. Di-*tert*-butyl dicarbonate (4.6 g, 21 mmol) in CH<sub>2</sub>Cl<sub>2</sub> (15 ml) was added dropwise over 30 min. After the addition, the ice and water bath was removed. The reaction mixture continued to stir for overnight at room temperature. The reaction mixture was washed with saturated NaHCO<sub>3</sub> (15 ml), was dried with brine (25 ml × 2) and dried over MgSO<sub>4</sub>, filtered. The filtrate was concentrated under the reduced pressure to give the product as a light yellow oil (3.17 g, 81%).

### ***tert*-Butyl (5-oxopentyl)carbamate (**13**)**

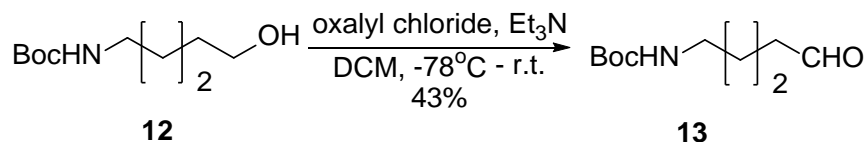

Oxalyl chloride (1 ml, 12 mmol) was dissolved in CH<sub>2</sub>Cl<sub>2</sub> in a 250 ml round-bottomed flask. Then it was cooled down to -78°C. DMSO (1.5 ml) in CH<sub>2</sub>Cl<sub>2</sub> was added dropwise. The reaction mixture reacted for 15 min at -78°C. Then *tert*-butyl (5-hydroxypentyl)carbamate (**12**) (3 g, 15 mmol) in 30 ml CH<sub>2</sub>Cl<sub>2</sub> and was added dropwise. After the addition, the reaction mixture stirred for 25 min at -78°C. The cooling bath was removed, the reaction mixture was warmed to room temperature. Then it was poured into ice and water mixture, extracted with CH<sub>2</sub>Cl<sub>2</sub> (50 ml × 2). The organic layer was separated and was washed with water (25 ml × 2), dried with brine (25 ml × 2), dried over MgSO<sub>4</sub>, filtered. The filtration was concentrated under the reduced pressure to give the crude product as a yellow oil. It was purified using combiflash machine to give the product as a white solid (0.86 g, 43%).

### **4-(2-Hydroxyethyl)phenol (**17**)**

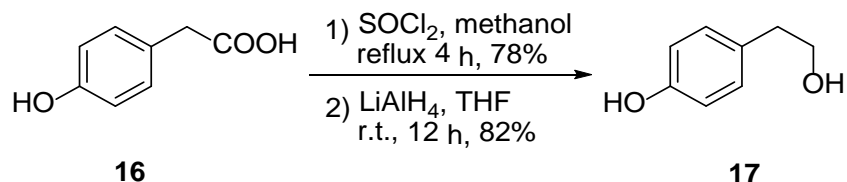

2-(4-Hydroxyphenyl)acetic acid (**16**) (1.5 g, 10 mmol) was dissolved in methanol (20 ml) and was cooled down to 0°C under ice and water bath. A few drops of SOCl<sub>2</sub> was added. Then the cooling bath was removed and refluxed for overnight. The solvent was removed under reduced pressure. It was used directly in the next step without further purification. Lithium aluminum hydride (2.2 g, 60 mmol) was suspended in a round-bottomed flask containing THF (90 ml) under ice and water bath. Methyl 2-(4-hydroxyphenyl)acetate (3.3 g, 20 mmol) added drop wise. The reaction mixture stirred for overnight at room temperature. Then it was quenched with 20% sodium hydroxide (10 ml). The reaction mixture was concentrated under reduced pressure. The residue was extracted with EtOAc (50ml × 3), separated. The organic phase was washed with



brine (50 ml  $\times$  2), dried with MgSO<sub>4</sub>, filtered, concentrated. It was purified using combiflash machine to obtain the product as a yellowish solid (2.3 g, 82%).

### 2-(4-Hydroxyphenyl)acetaldehyde (**18**)

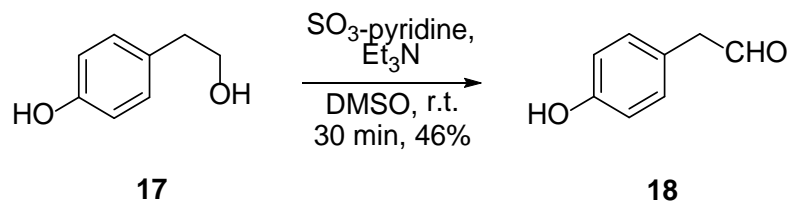

4-(2-Hydroxyethyl)phenol (**17**) (0.7 g, 5.2 mmol) was dissolved in DMSO (6.9 ml) containing triethylamine (1.4 ml, 10 mmol). Then SO<sub>3</sub>·Pyridine complex in DMSO (5 ml) was added dropwise very slowly. Then the reaction mixture stirred for 1 h at room temperature. Then the reaction was quenched with cold water (50 ml), the reaction mixture continued to stir for 5 min at room temperature. Then the reaction mixture was extracted with CH<sub>2</sub>Cl<sub>2</sub> (50 ml  $\times$  3). The organic phase was washed with water, dried with brine (25 ml  $\times$  2), dried over MgSO<sub>4</sub>, filtered, concentrated to obtain the product as a yellow oil (295 mg, 46%). It was used directly in the next step without further purification.

### 1,1-Dimethoxypropan-2-ol (**20**)

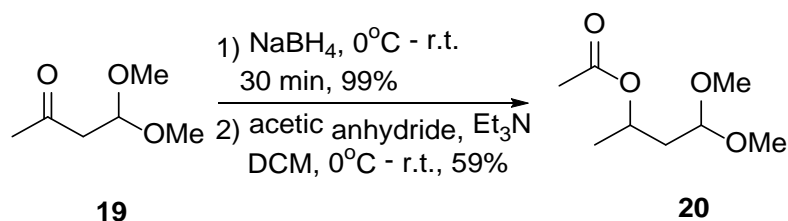

1, 1-Dimethoxypropan-2-one (**19**) (12 ml, 100 mmol) was dissolved in a round-bottomed flask containing a mixture of methanol/THF = 1/1 (100 ml). The mixture was cooled down to 0°C under ice and water bath. Then sodium borohydride (3.8 g, 100 mmol) was added. The reaction mixture stirred for 30 min at room temperature. Then the reaction mixture was neutralized with 1N HCl to pH = 6. Then the reaction mixture was extracted with ether (100 ml  $\times$  3), the organic phase was separated and washed with brine (100 ml  $\times$  2), dried with MgSO<sub>4</sub>, filtered. The

solvent was removed under reduced pressure to obtain the product as a light yellow oil with a quantitative yield. 1,1-dimethoxypropan-2-ol (0.8 g, 6.9 mmol) was dissolved in a round-bottomed flask containing CH<sub>2</sub>Cl<sub>2</sub> (3 ml). Then triethyl amine (1.9 ml, 14 mmol) and DMAP (39 mg, 0.32 mmol) were added. The reaction mixture was cooled down to 0°C under ice and water bath. Acetic anhydride (0.7 ml, 7.5 mmol) in CH<sub>2</sub>Cl<sub>2</sub> (2 ml) was added drop wise. It stirred for 2h. Then the reaction mixture was extracted with CH<sub>2</sub>Cl<sub>2</sub>. The organic phase was separated and washed with water (25 ml × 2), 0.1N HCl (10 ml × 2), was dried with brine (25 ml × 2), dried over MgSO<sub>4</sub>, filtered, was purified using combiflash machine to obtain the colorless solid as a product (735 mg, 59%).

#### 4-Oxopropan-2-yl acetate (21)

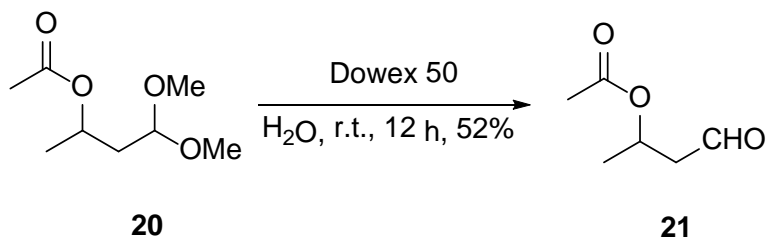

1,1-Dimethoxypropan-2-yl acetate (**20**) (0.96 g, 5.9 mmol) was dissolved in a round-bottomed flask containing water (5 ml). Then Dowex 50 (544 mg) were added. The reaction mixture stirred for overnight at room temperature. The reaction mixture was filtered and extracted with EtOAc (25 ml × 2), dried with brine (25 ml × 2), dried over MgSO<sub>4</sub>, filtered, concentrated. The product was obtained as a colorless oil (354 mg, 52%).

#### 2-(1H-Indol-3-yl)ethanol (23)

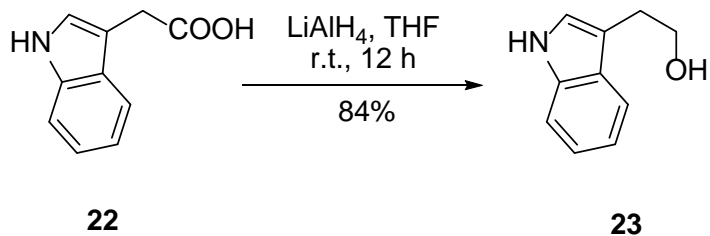

Lithium aluminum hydride (1.6 g, 43 mmol) was suspended in a round-bottomed flask containing THF (90 ml) under ice and water bath. 2-(1H-indol-3-yl)acetic acid (**22**) (2.4 g, 13.8 mmol) added in portions. The reaction mixture stirred for overnight at room temperature. Then it was quenched with sodium hydroxide (20%). The reaction mixture was concentrated under reduced pressure. The residue was extracted with EtOAc (50 ml  $\times$  3), separated. The organic phase was washed with brine (25 ml  $\times$  2), dried with MgSO<sub>4</sub>, filtered, concentrated. It was purified using combiflash machine to obtain the product as a grey solid (1.9 g, 84%).

### 2-(1H-Indol-3-yl)acetaldehyde (**24**)

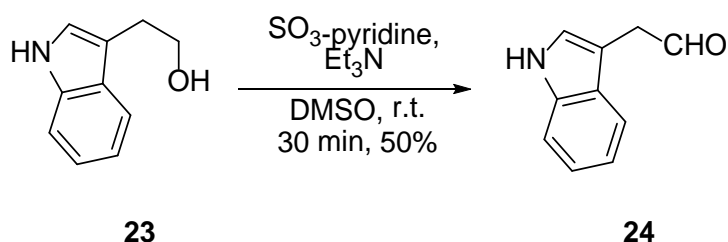

2-(1H-indol-3-yl)ethanol (**23**) (0.3 g, 2 mmol) was dissolved in DMSO (5 ml) containing triethylamine (1.4 ml, 10 mmol). Then SO<sub>3</sub>·Pyridine complex (1 g) in DMSO (3 ml) was added dropwise very slowly. Then the reaction mixture stirred for 30 min at 0°C. Then the reaction was quenched with cold water (50 ml), the reaction mixture continued to stir for 5 min at room temperature. Then the reaction mixture was extracted with CH<sub>2</sub>Cl<sub>2</sub> (50 ml  $\times$  4). The organic phase was washed with water (25 ml  $\times$  2), dried with brine (25 ml  $\times$  2), dried over MgSO<sub>4</sub>, filtered, concentrated to obtain the product as a yellow oil (160 mg, 50%). It was used directly in the next step without further purification.

### Ethyl 3-(tritylimino)propanoate (**25**)

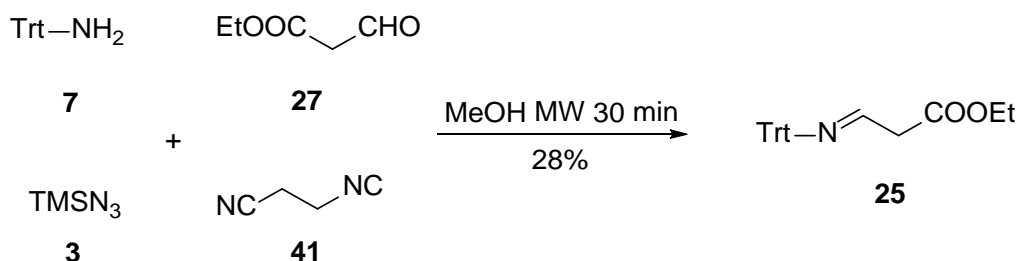

Ethyl 3-oxopropanoate (116.2mg, 1 mmol) and tritylamine (260.1mg, 1 mmol) were suspended in MeOH (1 mL) in a sealed vial with a magnetic stirring bar. The reaction was heated at 100°C for 15 minutes using microwave irradiation. Then isocyanide (81.2mg, 1 mmol) and azidotrimethylsilane (135  $\mu$ L, 1 mmol) were added into the reaction mixture and further heated at 100°C for 15 minutes using microwave irradiation. The solvent was removed under reduced pressure and the residue was purified using flash chromatography.

### Ethyl 3-oxopropanoate (27)

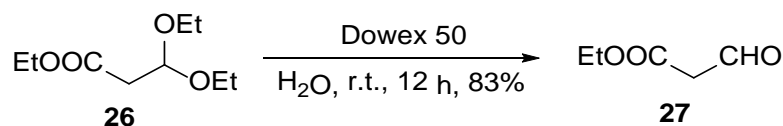

Ethyl 3,3-diethoxypropanoate (**26**) (390  $\mu$ l, 2 mmol) was dissolved in a 50 ml round-bottomed flask. Then Dowex 50 was added. The reaction mixture stirred for 24 h at room temperature. The reaction mixture was filtered and the aqueous phase was extracted with CH<sub>2</sub>Cl<sub>2</sub> for several times. The organic phases were combined and dried with brine (25 ml  $\times$  2), dried over MgSO<sub>4</sub>, concentrated under the reduced pressure to give the product as a colorless liquid (194 mg, 83%).

### Methyl 2-(1-trityl-1H-imidazol-4-yl)acetate (29)

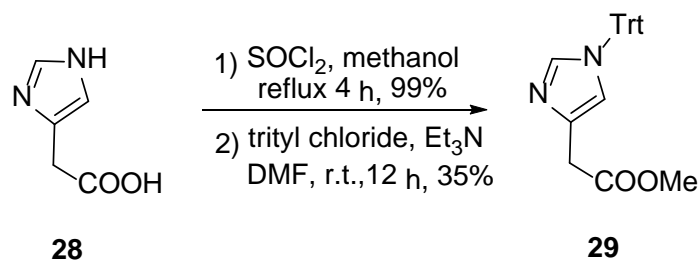

2-(1H-imidazol-4-yl)acetic acid (**28**) (0.8 g, 5 mmol) was dissolved in methanol (30 ml) and was cooled down to 0°C under ice and water bath. A few drops of thionyl chloride was added. Then the cooling bath was removed and refluxed for overnight. The solvent was removed under reduced pressure. It was used directly in the next step without further purification. Methyl 2-(1H-imidazol-4-yl)acetate hydrochloride (1.8 g, 10 mmol) was dissolved in DMF (8.4 ml) and triethylamine (4 ml, 29 mmol) was added. The reaction mixture stirred for 1h at room

temperature. Then trityl chloride (2.8 g, 10 mmol) was added. The reaction mixture continued to stir for overnight at room temperature. The solvent was coevaporated with hexane for several times. Then the residue was purified using combiflash machine to give the product as a white solid (2.5 g, 65%).

### 2-(1-Trityl-1H-imidazol-4-yl)acetaldehyde (**30**)

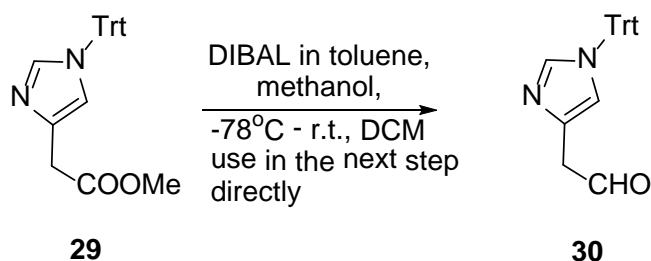

Methyl 2-(1-trityl-1H-imidazol-4-yl)acetate (**29**) (0.4 g, 1mmol) was dissolved in CH<sub>2</sub>Cl<sub>2</sub> and was cooled down to -78°C. DIBAL (1.7 M in toluene, 0.6 ml) was added drop wise. During the addition, the temperature was kept below -78°C. After the addition, the reaction mixture stirred for 1.5 h, 0.3 ml DIBAL was added. After stirring 3 h at -78°C, 0.3 ml DIBAL was added again. 10 min later, 1.5 ml methanol was added drop wise to quench the reaction. Then the reaction mixture was warmed up slowly to room temperature. The reaction mixture was filtered and concentrated under the reduced pressure. The residue was used in the next step directly without further purification.

### Di-tert-butyl sulfinyldicarbamate (**32**)

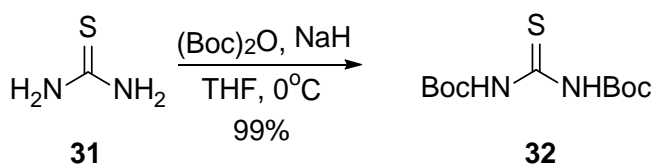

To a stirred colorless solution of thiourea (**30**) (0.57 g, 7.5 mmol) in THF (150 ml) under N<sub>2</sub> at 0°C was added heptane washed NaH (1.4 g, 1.35 mmol). After 5 min, the 0°C bath was removed

and the reaction mixture was allowed to stir at room temperature for 10 min. The reaction mixture was cooled to 0°C and di-*tert*-butyl dicarbonate (3.6 g, 16.5 mmol) was added neat. After 30 min, the 0°C bath was removed. A slurry formed within 30 min. The reaction mixture was stirred for another 2 h at room temperature and was then quenched with an aqueous solution of saturated NaHCO<sub>3</sub> (10 ml). The reaction mixture was poured into water (150 ml) and extracted with ethyl acetate (70 ml × 3). The combined organic layers were dried over MgSO<sub>4</sub>, filtered and concentrated under reduced vacuum, 2.03 g (99% as an off-white solid which was used without further purification.

#### ***tert*-Butyl (4-hydroxybutyl)carbamate (34)**

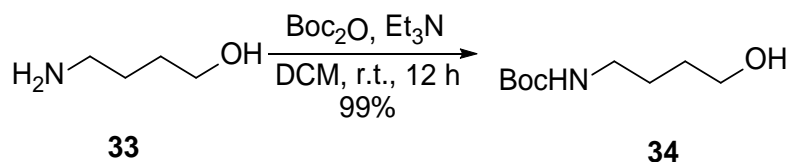

4-Aminobutan-1-ol (**32**) (900 mg, 10 mmol) was dissolved in THF in a 100 ml round-bottomed flask equipped with a magnetic stirring egg and a pressure equalizing addition funnel and was cooled down to 0°C under ice and water bath. Di-*tert*-butyl dicarbonate (2.4 g, 10 mmol) in THF was added drop wise over 30 min. After the addition, the ice and water bath was removed. The reaction mixture continued to stir for overnight at room temperature. The reaction mixture was washed with saturated NaHCO<sub>3</sub> (50 ml), was dried with brine (50 ml × 2) and dried over MgSO<sub>4</sub>, filtered. The filtrate was concentrated under the reduced pressure to give the product as a light yellow oil (3.8 g, 99%).

#### ***tert*-Butyl (4-oxobutyl)carbamate (35)**

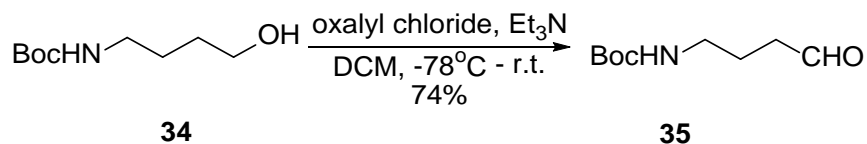

Oxalyl chloride (450 µl, 5 mmol) was dissolved in CH<sub>2</sub>Cl<sub>2</sub> in a 3-necked round-bottomed flask. Then it was cooled down to -78°C. DMSO (0.72 ml) in CH<sub>2</sub>Cl<sub>2</sub> was added dropwise. The

reaction mixture reacted for 15 min at  $-78^{\circ}\text{C}$ . Then *tert*-butyl (5-hydroxypentyl)carbamate (**33**) (0.9 g, 5 mmol) in  $\text{CH}_2\text{Cl}_2$  and was added dropwise. After the addition, the reaction mixture stirred for 25 min at  $-78^{\circ}\text{C}$ . The cooling bath was removed, the reaction mixture was warmed to room temperature. Then it was poured into ice and water mixture, extracted with  $\text{CH}_2\text{Cl}_2$  (30 ml  $\times$  3). The organic layer was separated and was washed with water (30 ml  $\times$  2), dried with brine, dried over  $\text{MgSO}_4$ , filtered. The filtration was concentrated under the reduced pressure to give the product as a yellow oil. It was purified using combiflash machine to give the product (879 mg, 74%).

## 2. Spectra of Products (<sup>1</sup>H NMR, <sup>13</sup>C NMR Spectra and MS)

### 1,1,1-Triphenyl-N-((1-(2,4,4-trimethylpentan-2-yl)-1H-tetrazol-5-yl)methyl)methanamine (5a)

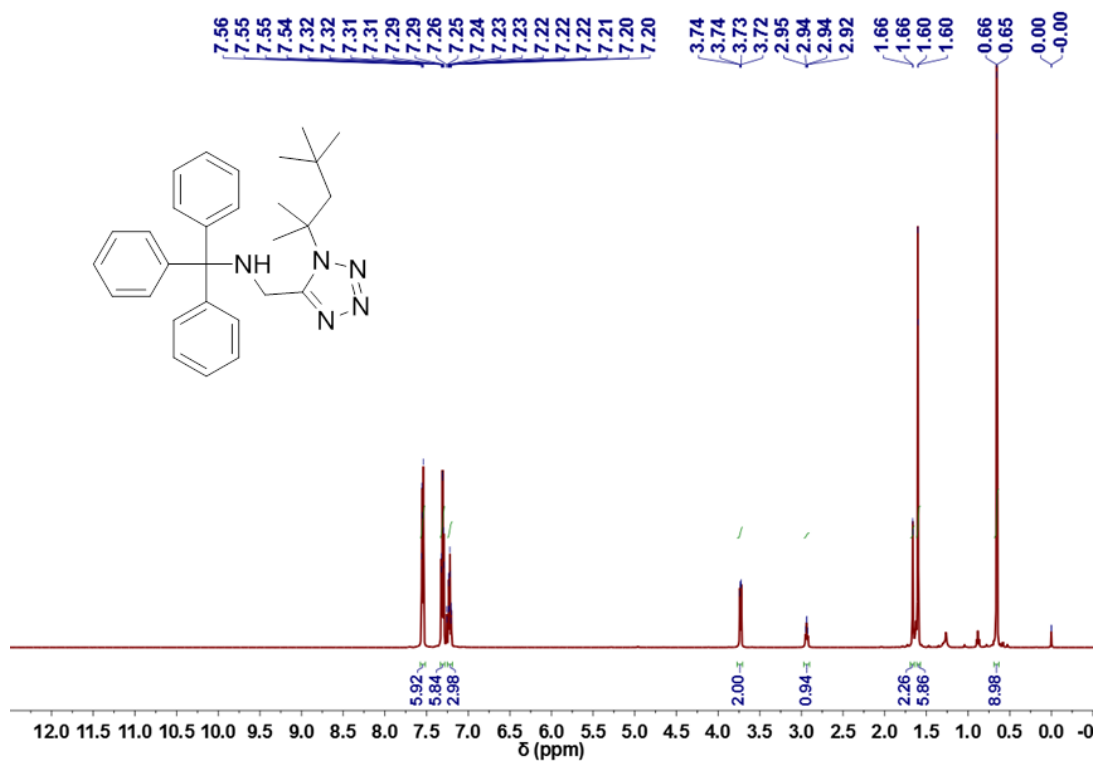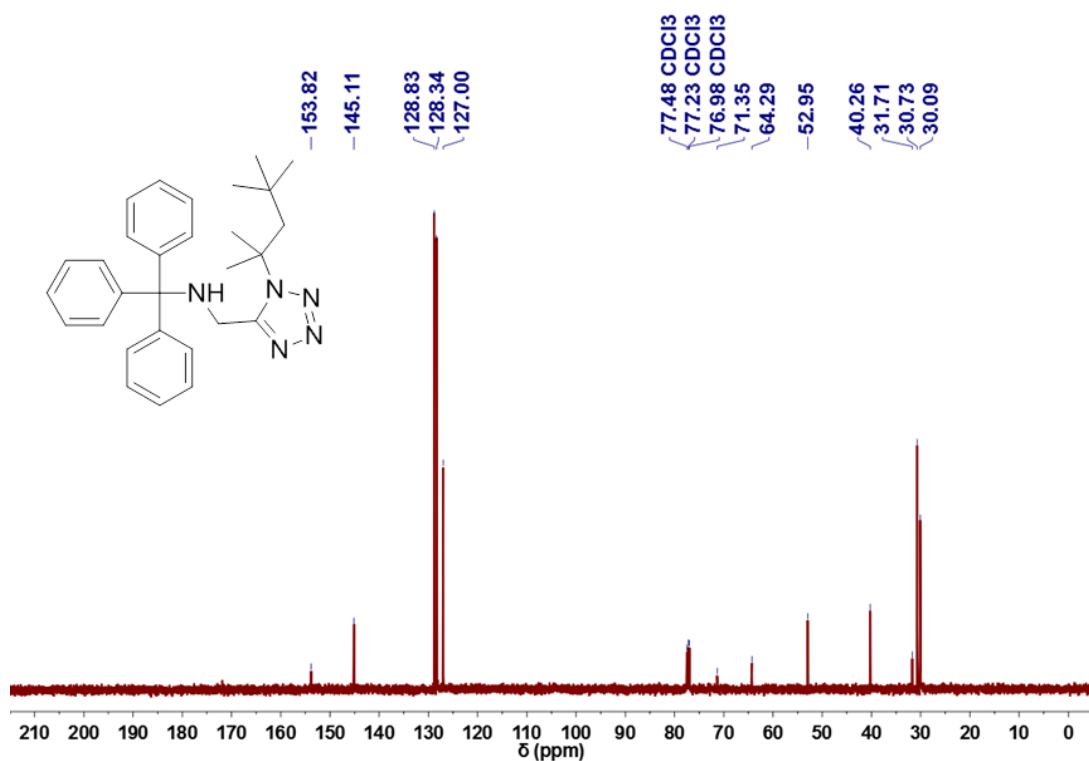



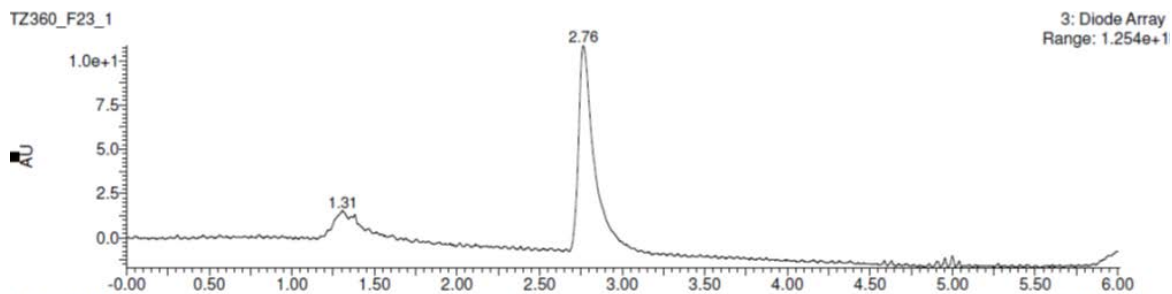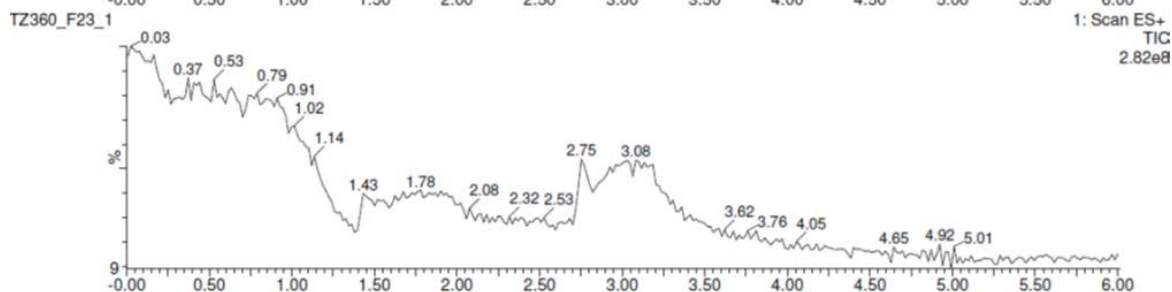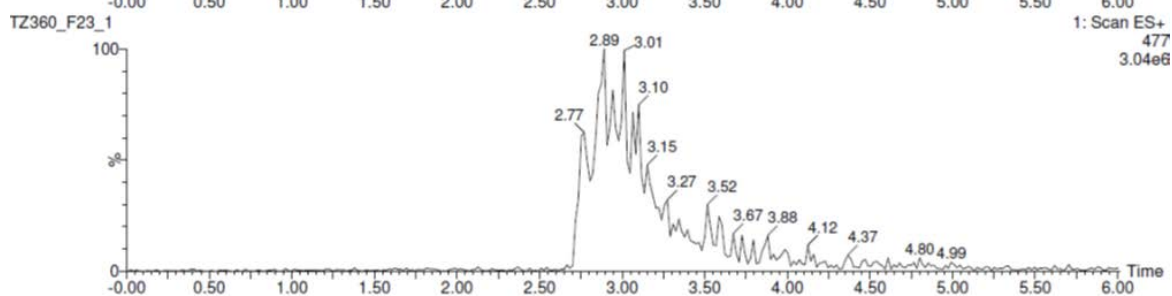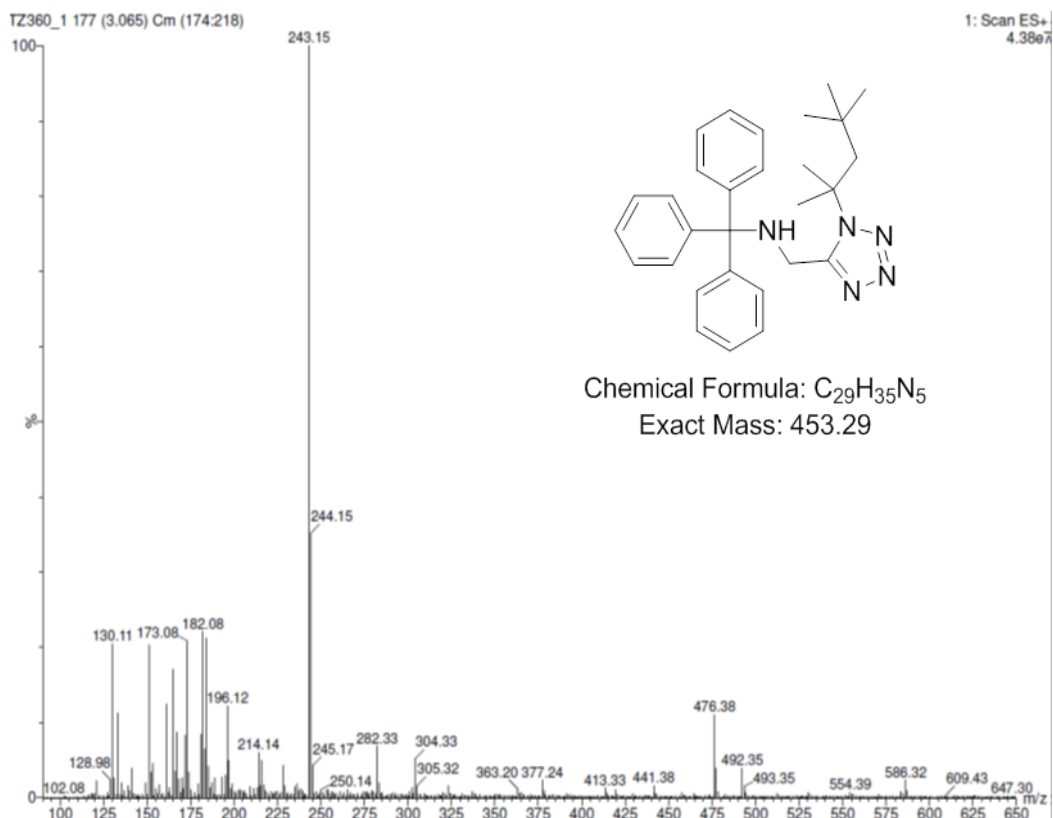

1-(1-(2,4,4-Trimethylpentan-2-yl)-1H-tetrazol-5-yl)-N-trityl-ethanamine (5b)

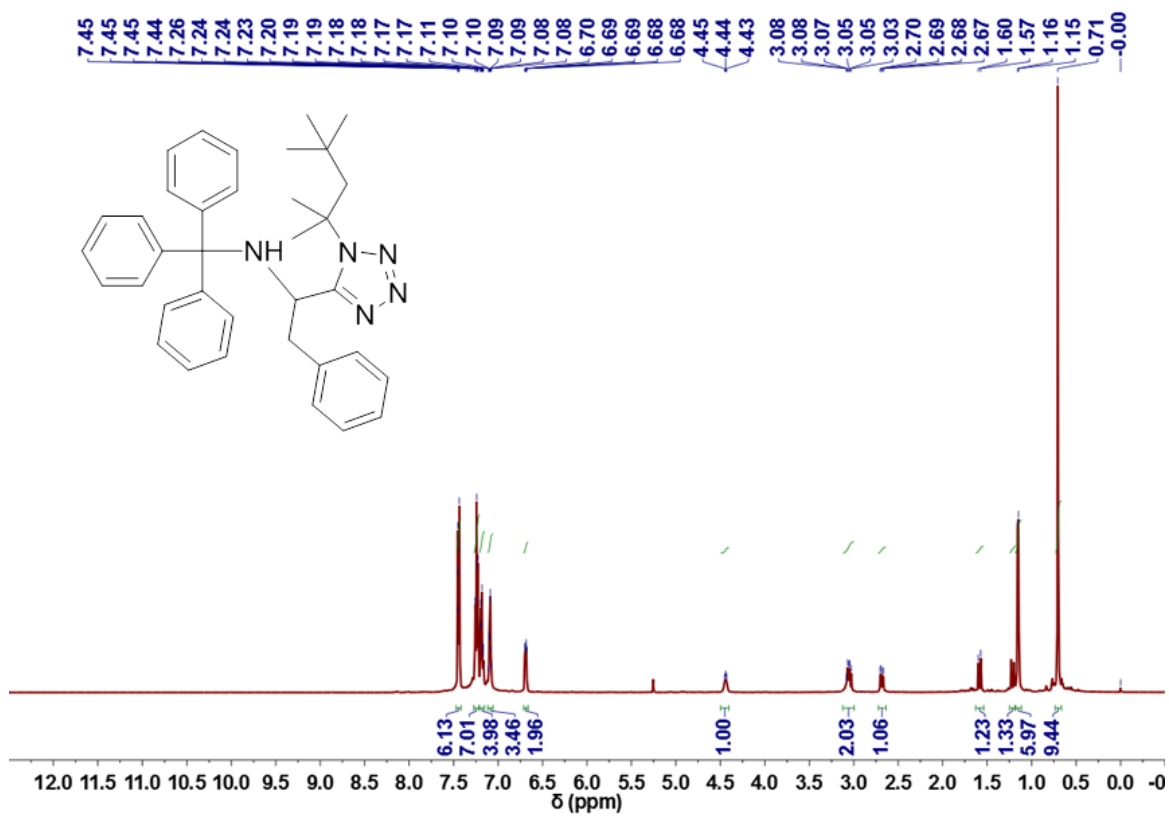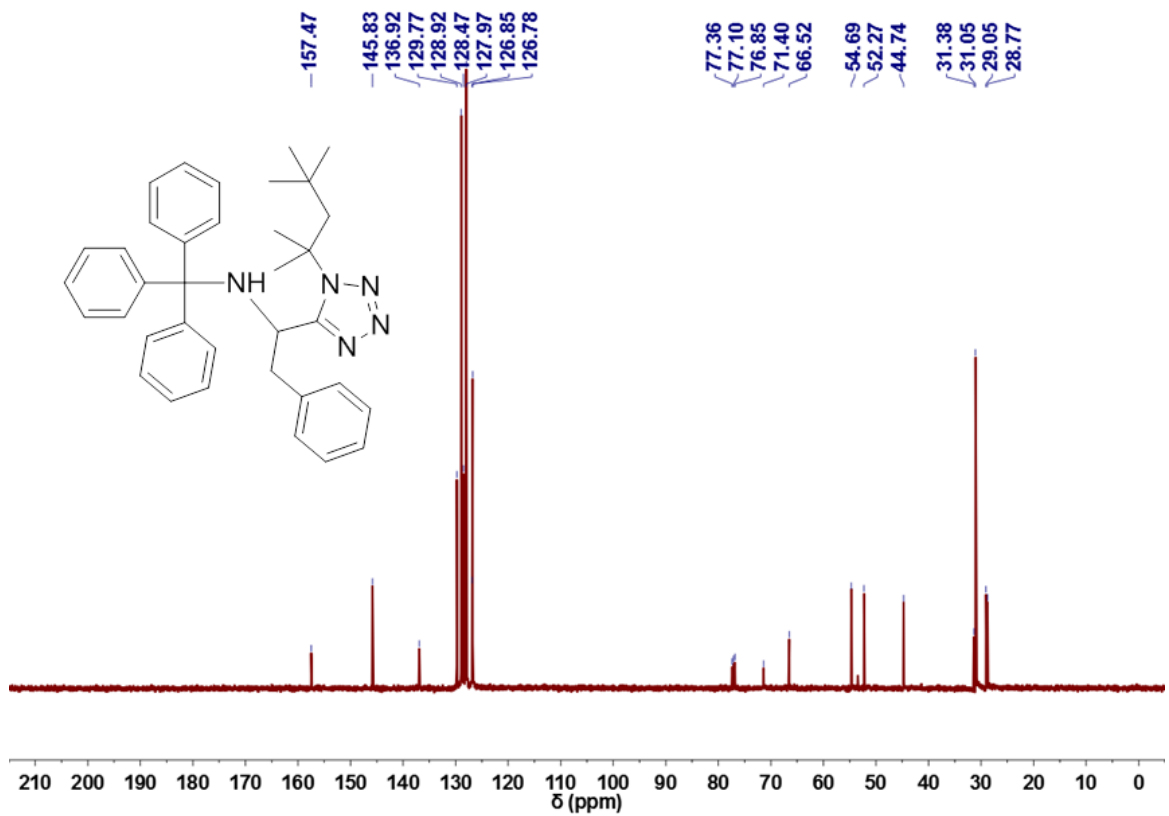

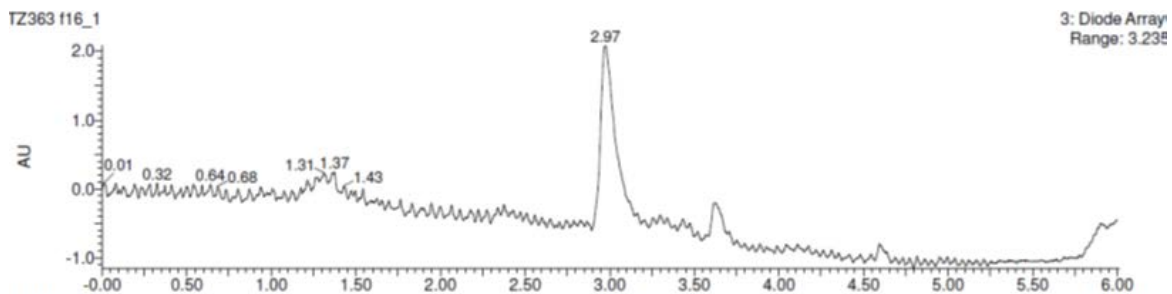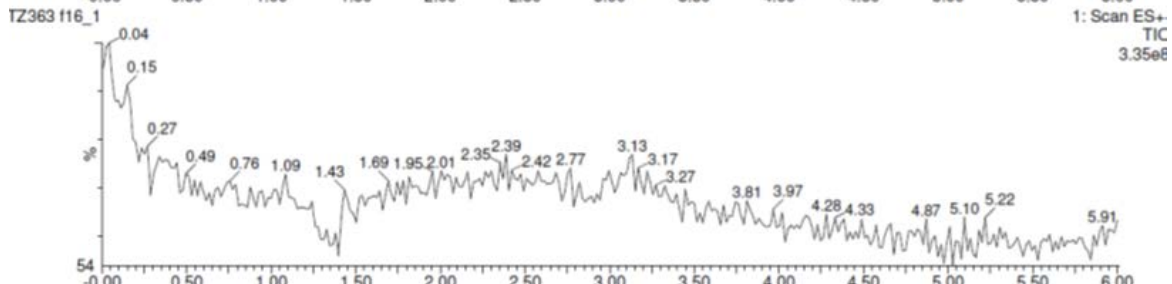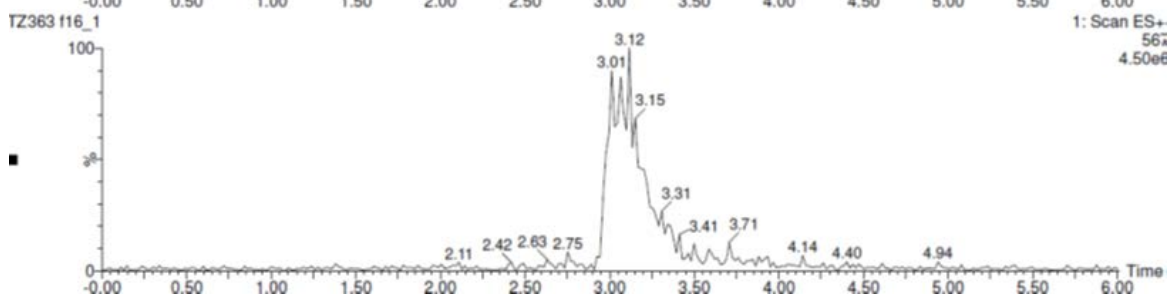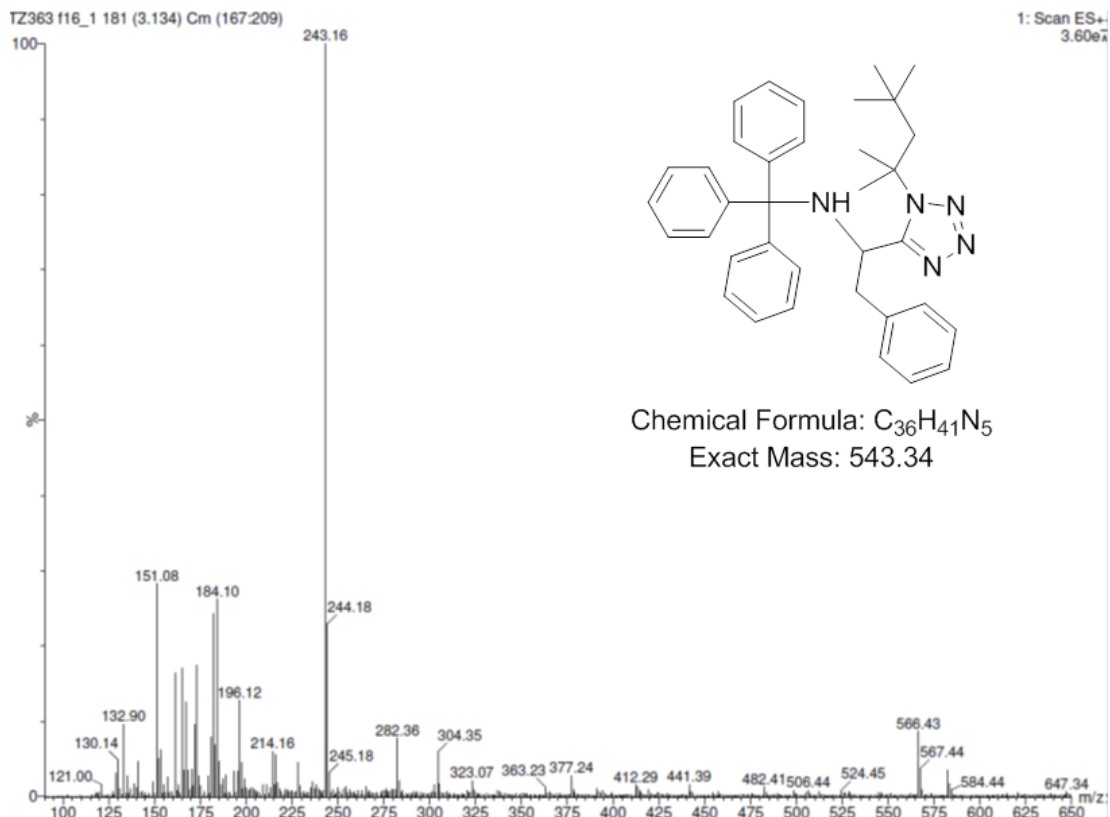

1-(1-(2,4,4-Trimethylpentan-2-yl)-1H-tetrazol-5-yl)-N-tritylethanamine (5c)

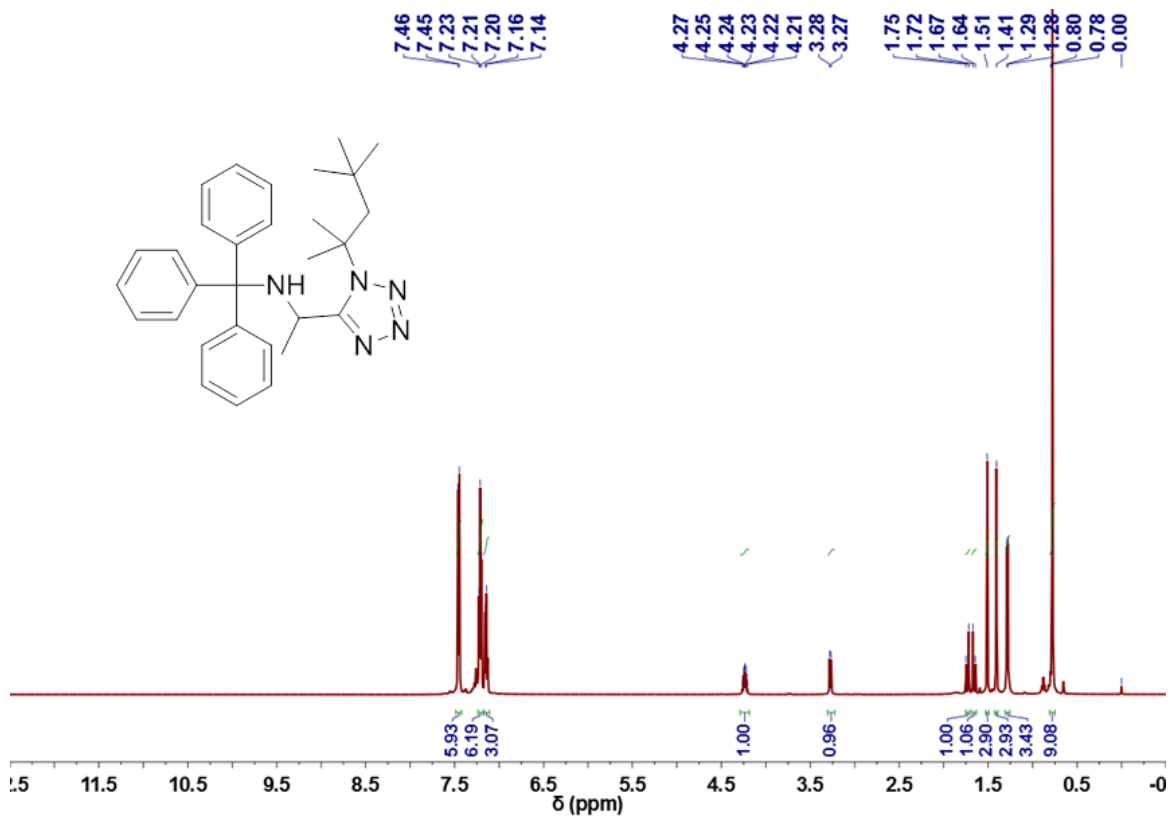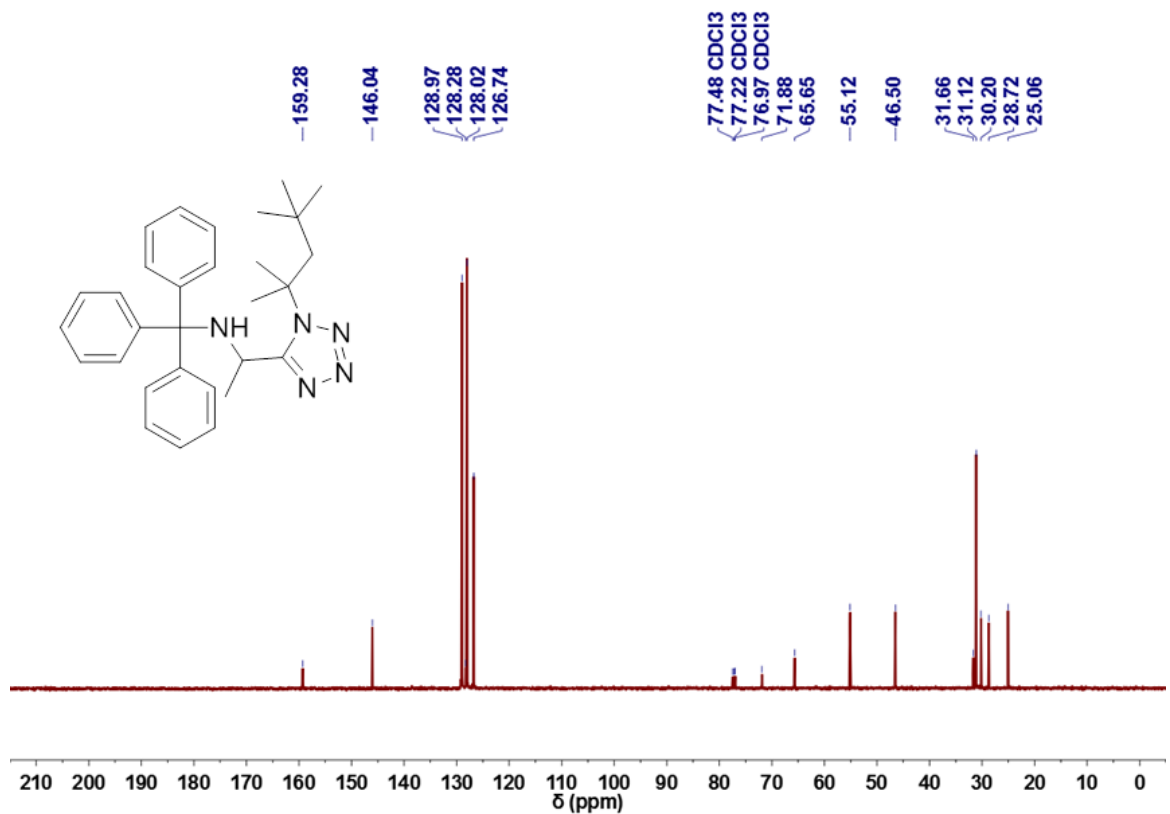

TZ361\_1\_EthPyr\_4.6X250\_MeOH\_5-30%\_6min

TZ361\_1

3: Diode Array  
Range: 6.26f

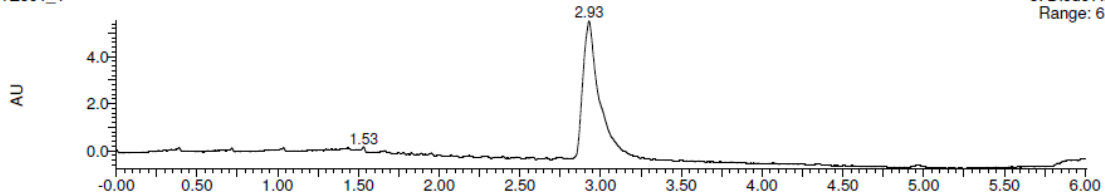

TZ361\_1

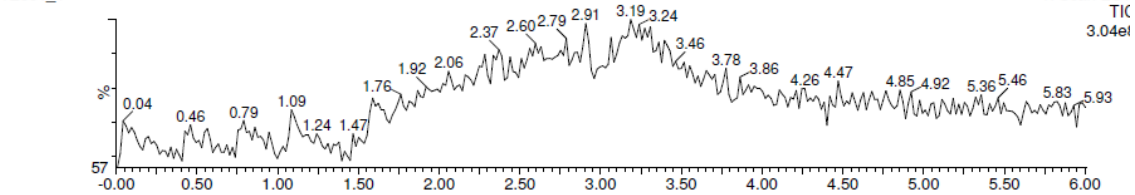

TZ361\_1

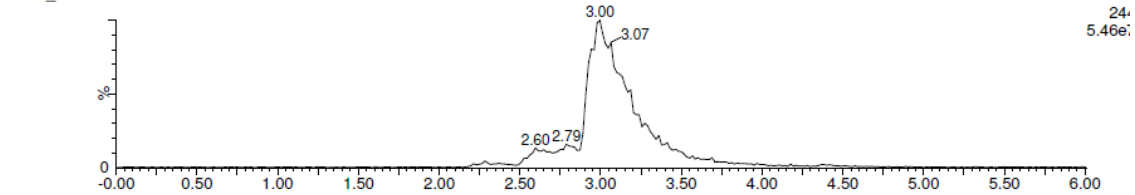

TZ361\_1

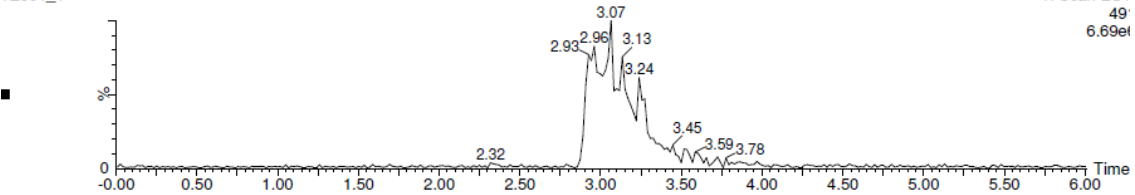

TZ361\_1 184 (3.187) Cm (166:216)

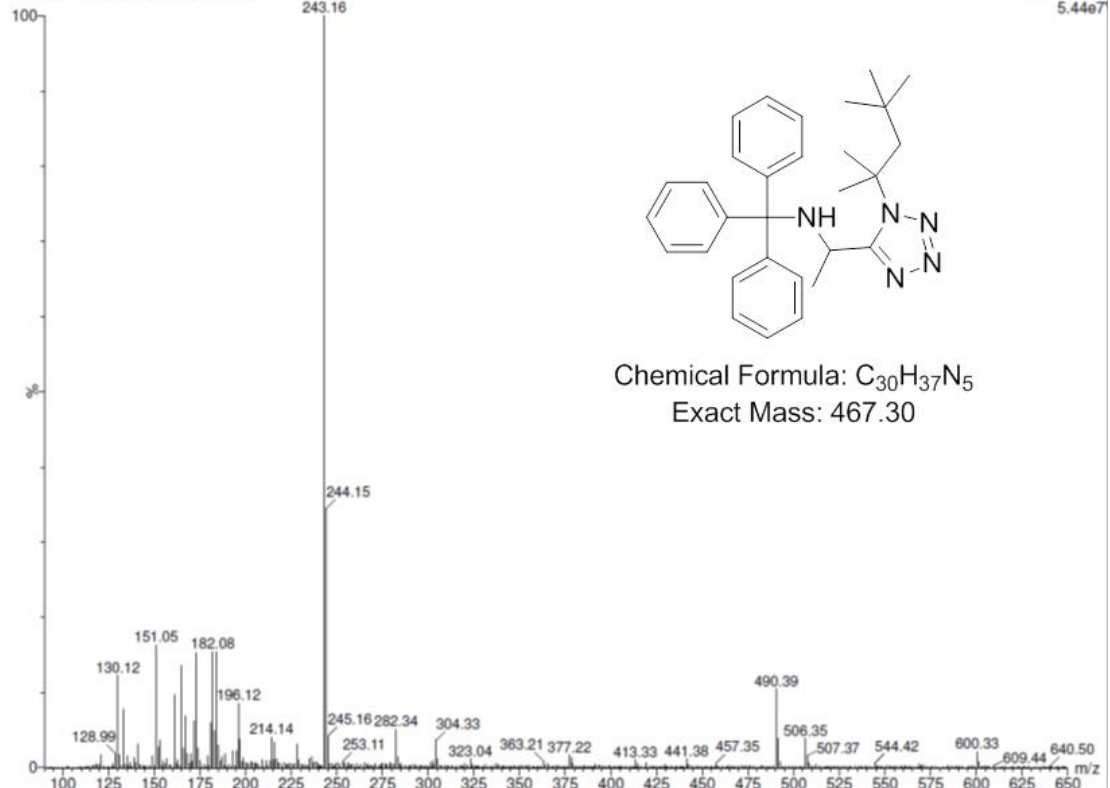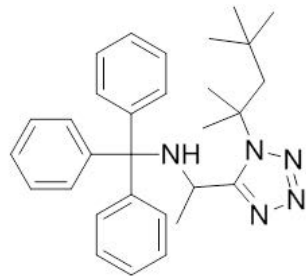

Chemical Formula: C<sub>30</sub>H<sub>37</sub>N<sub>5</sub>  
Exact Mass: 467.30

Methyl 4-(1-(2,4,4-trimethylpentan-2-yl)-1H-tetrazol-5-yl)-4-(tritylamino)butanoate (5d)

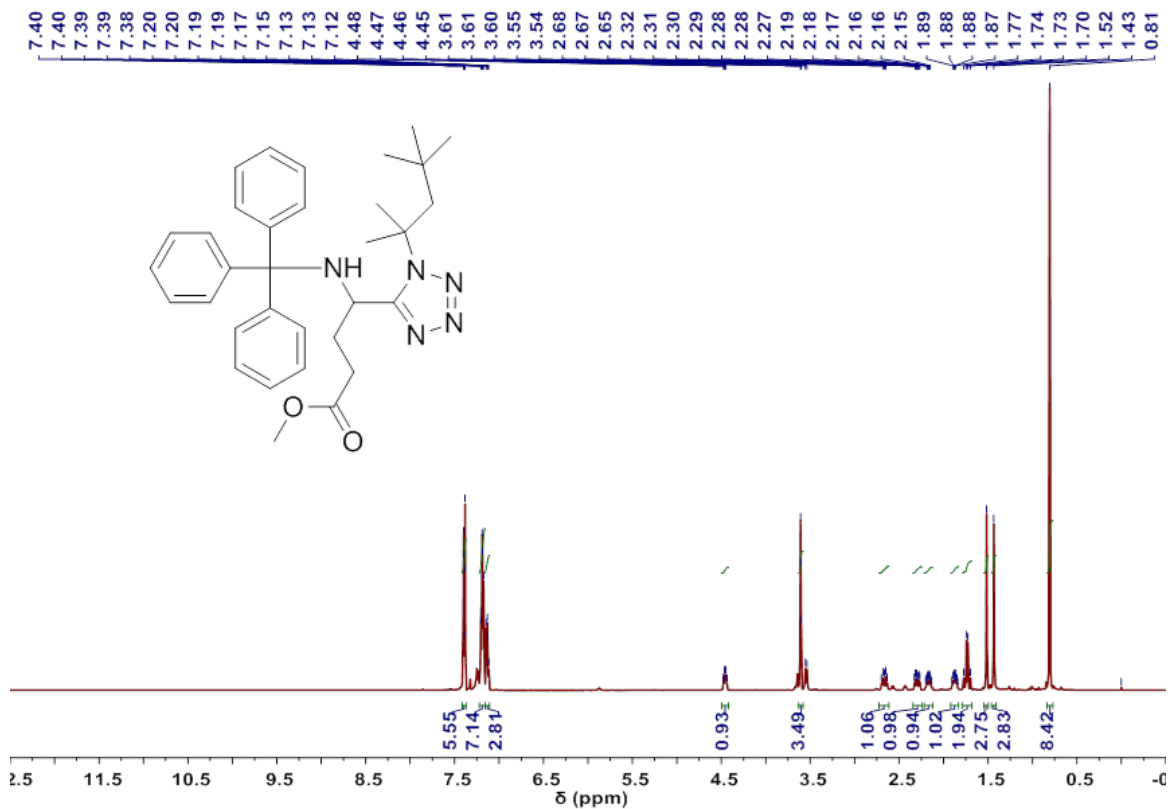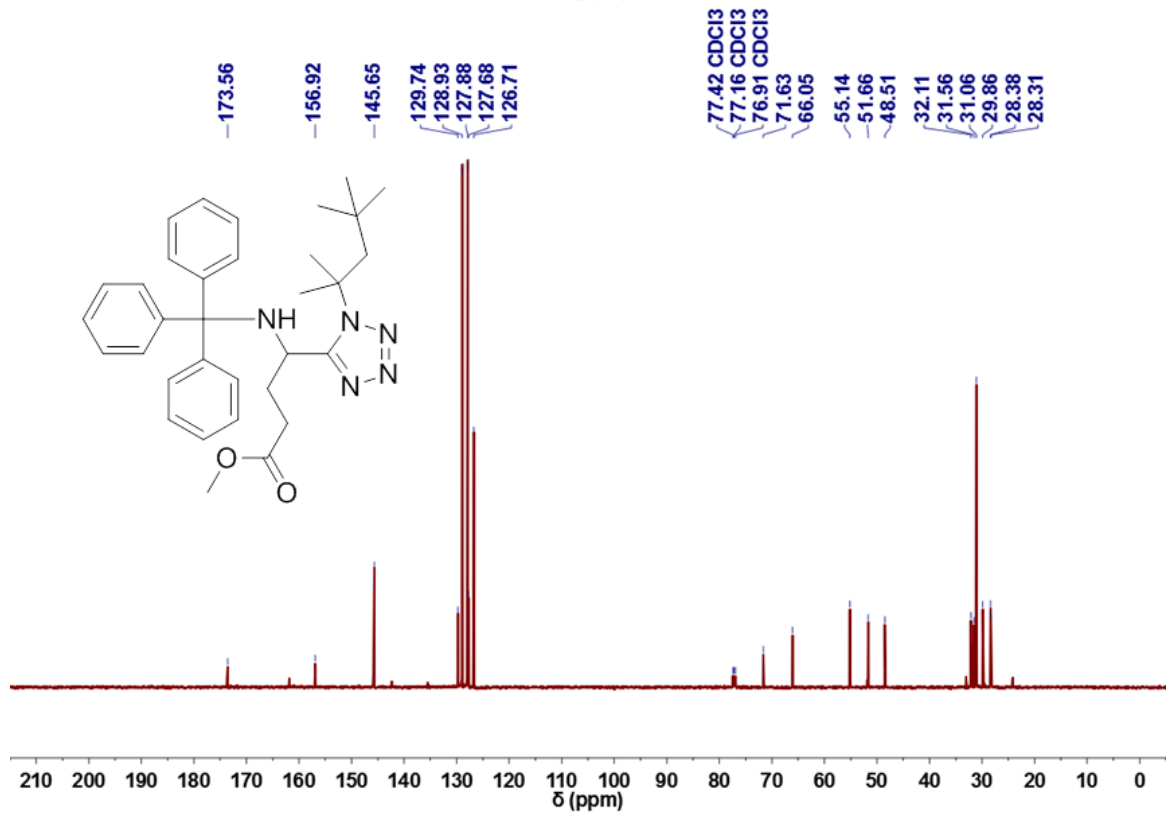

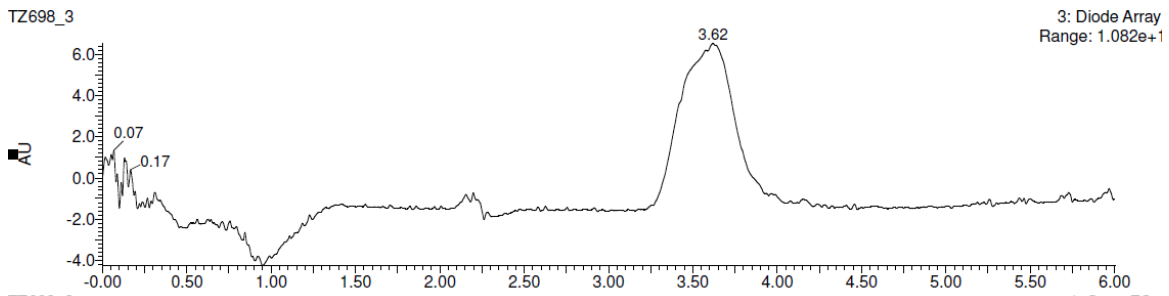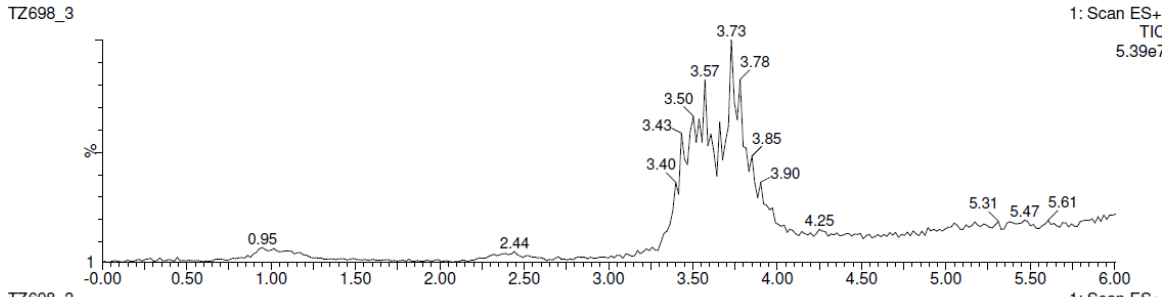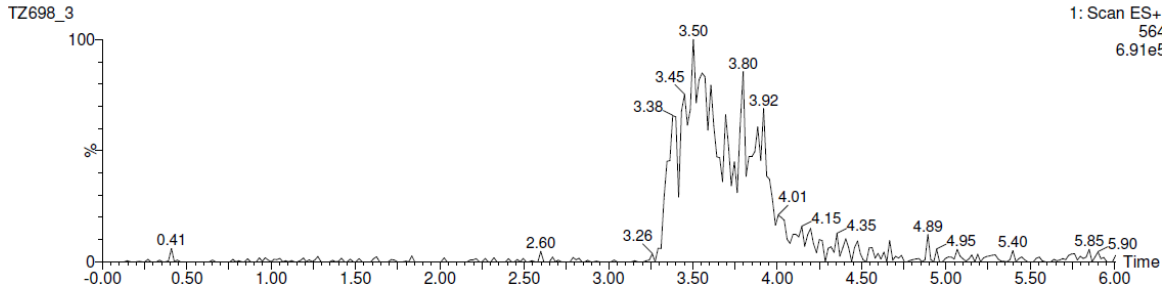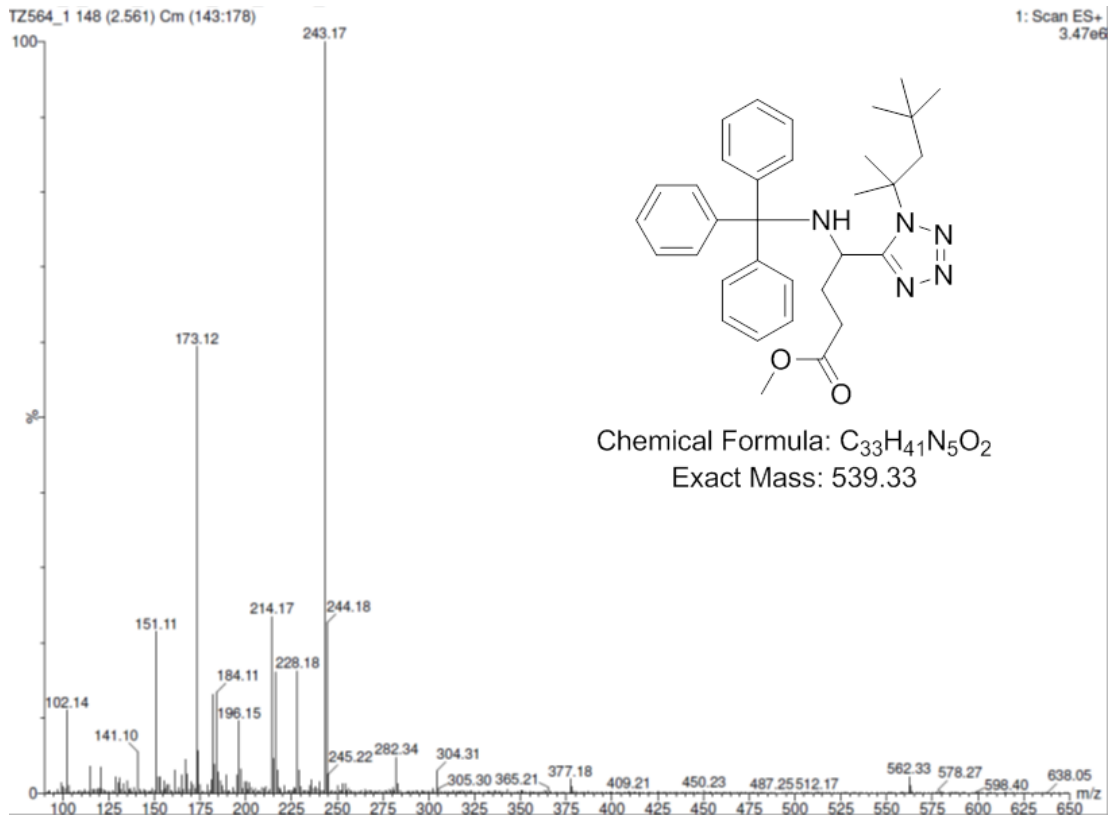

***tert*-Butyl (5-(1-(2,4,4-trimethylpentan-2-yl)-1H-tetrazol-5-yl)-5-(tritylamino)pentyl)carbamate (5e)**

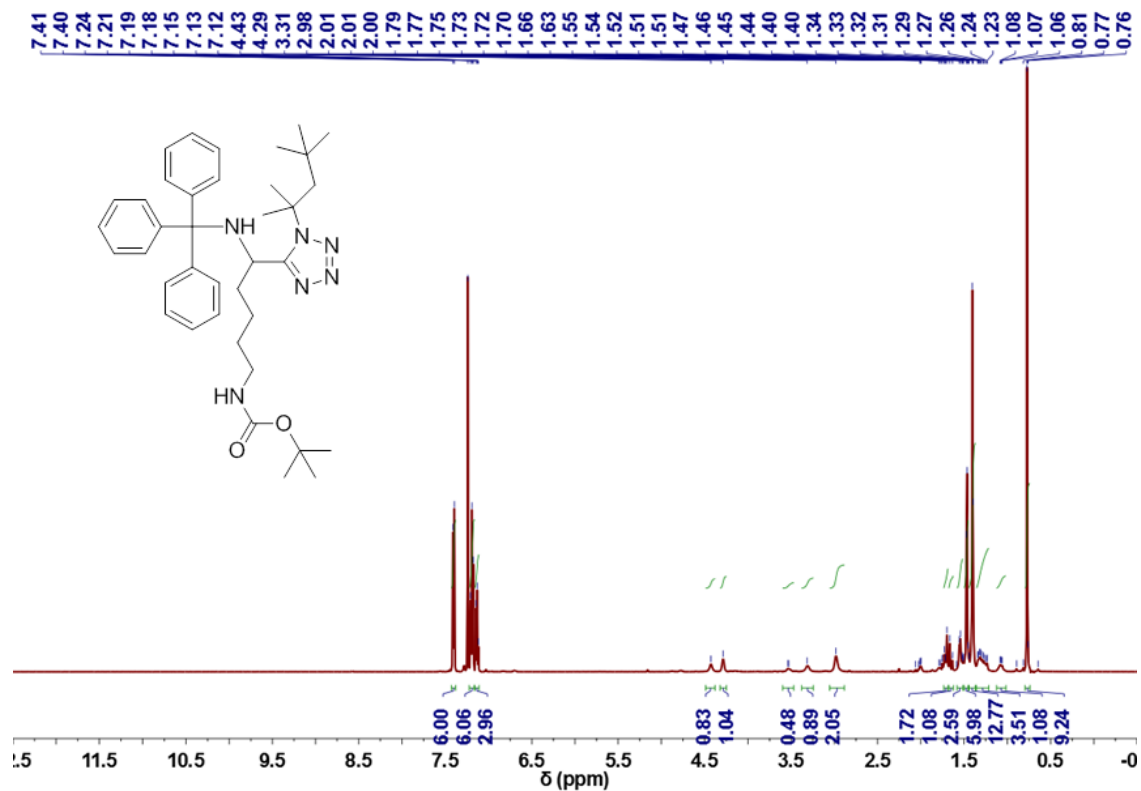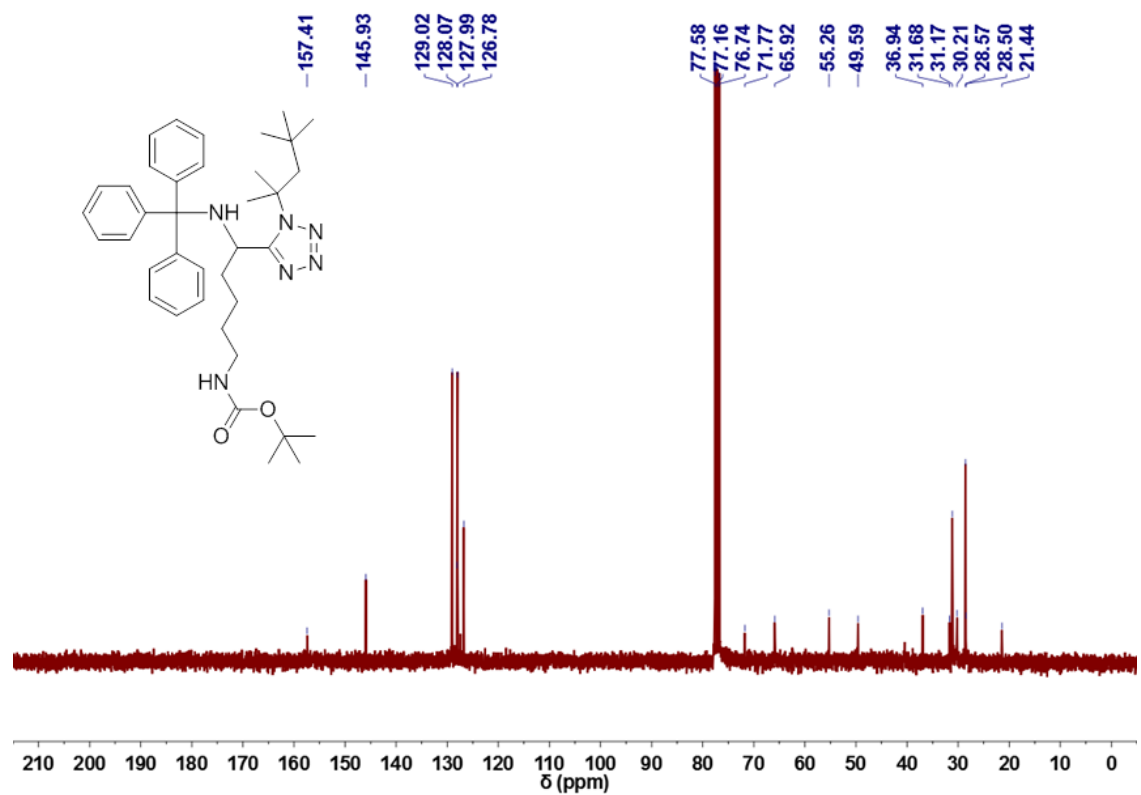



TZ491\_3\_Col3\_sol1\_5-30%\_6min  
TZ491\_4

3: Diode Array  
Range: 1.22e+

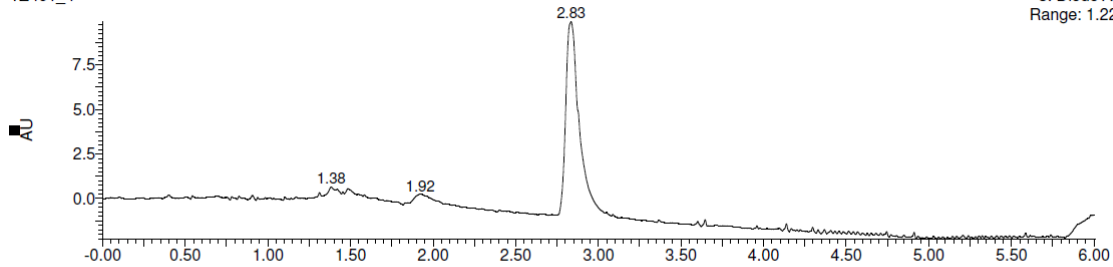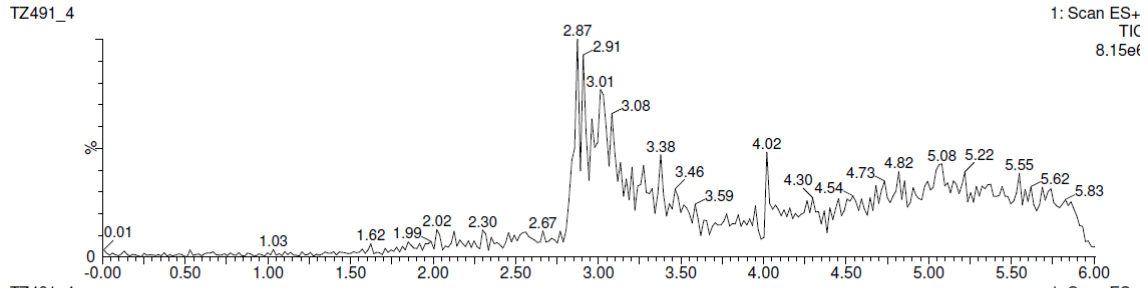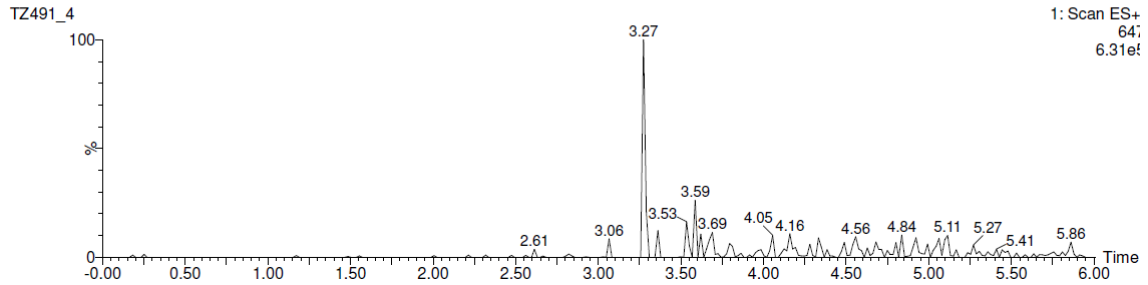

TZ491\_3\_Col3\_sol1\_5-30%\_6min  
TZ491\_4 166 (2.874) Cm (160:207)

1: Scan ES+  
6.62e6

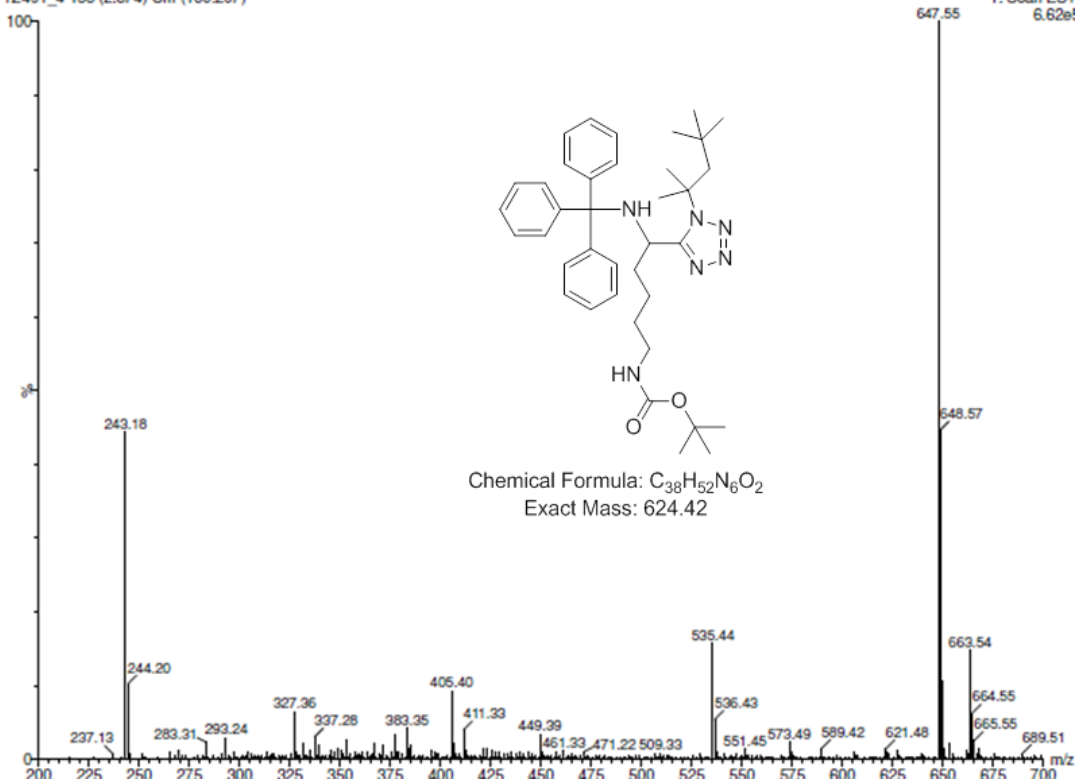

**3-Methyl-1-(1-(2,4,4-trimethylpentan-2-yl)-1H-tetrazol-5-yl)-N-tritylbutan-1-amine (5f)**

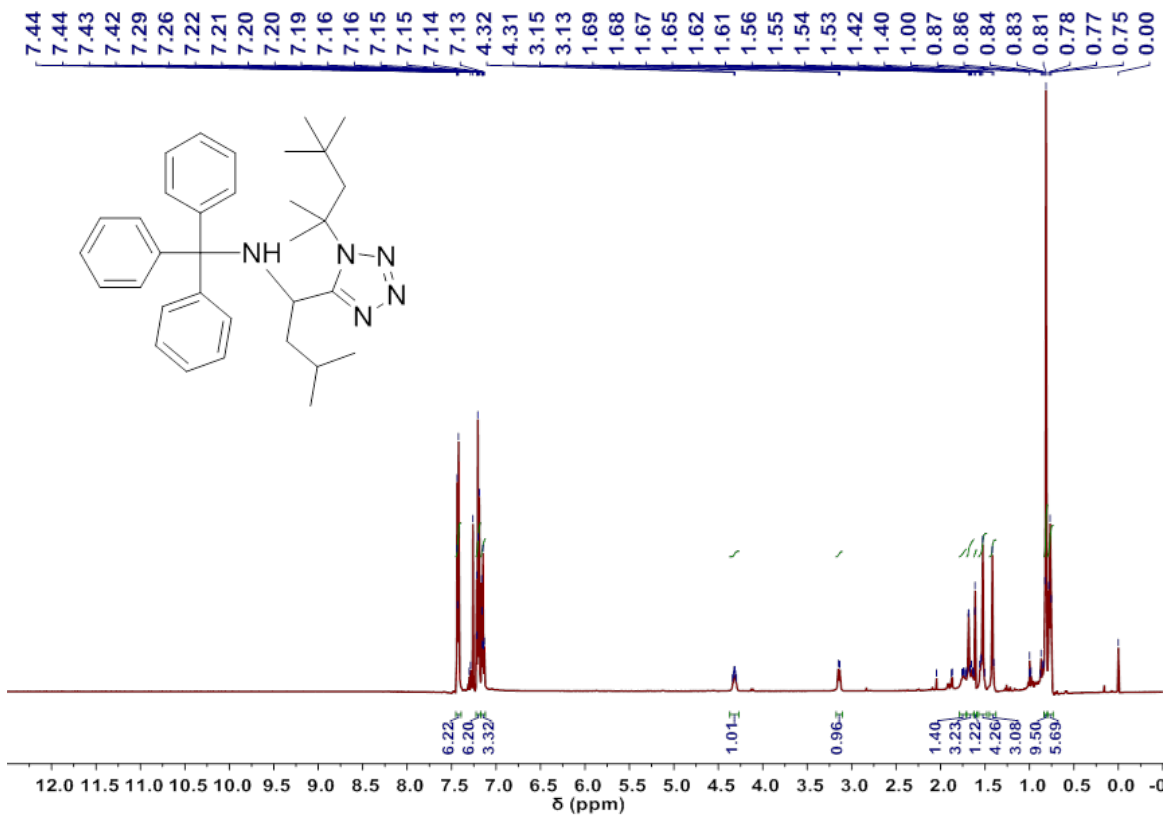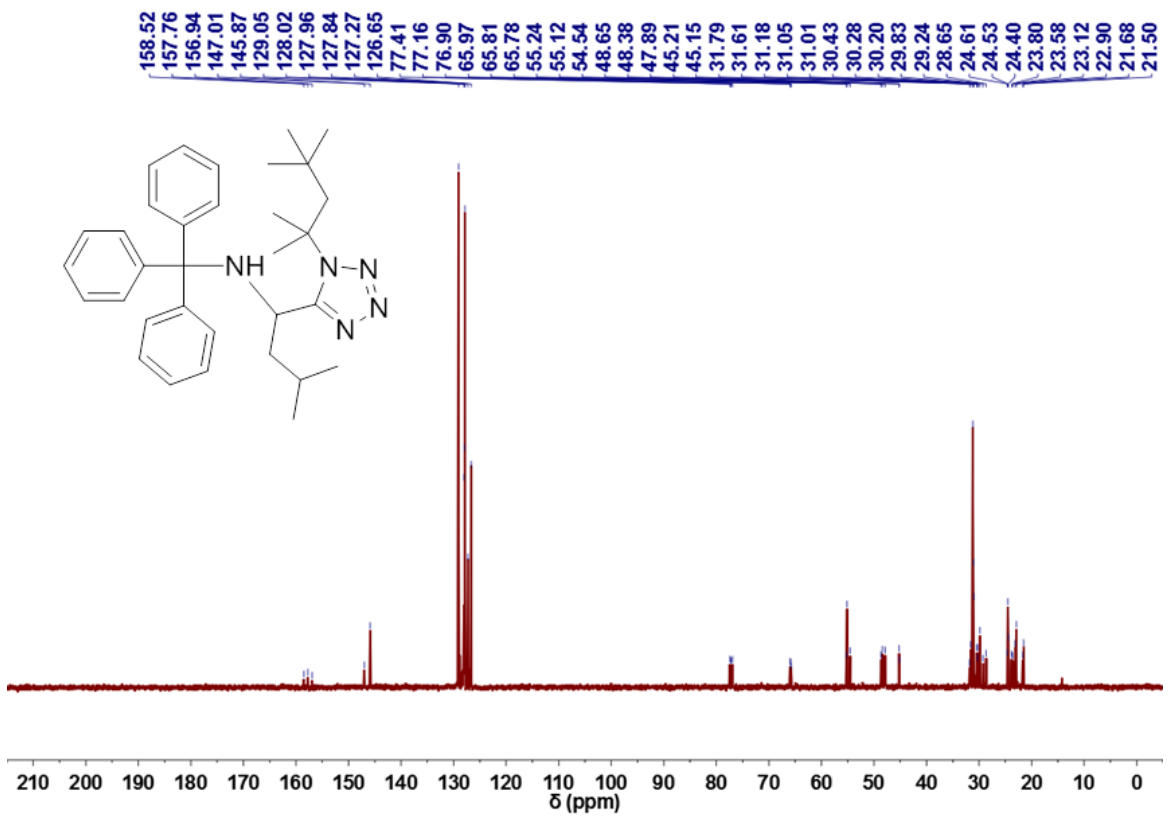

TZ387\_3\_Col3\_sol1\_5-30%\_6min  
TZ387\_3

3: Diode Array  
Range: 1.169e+

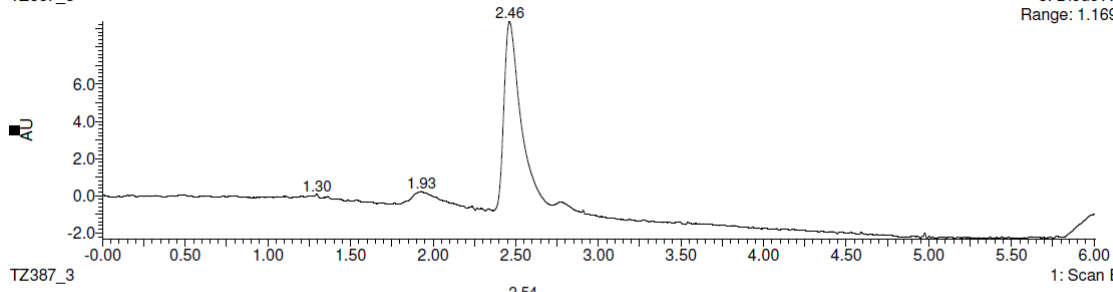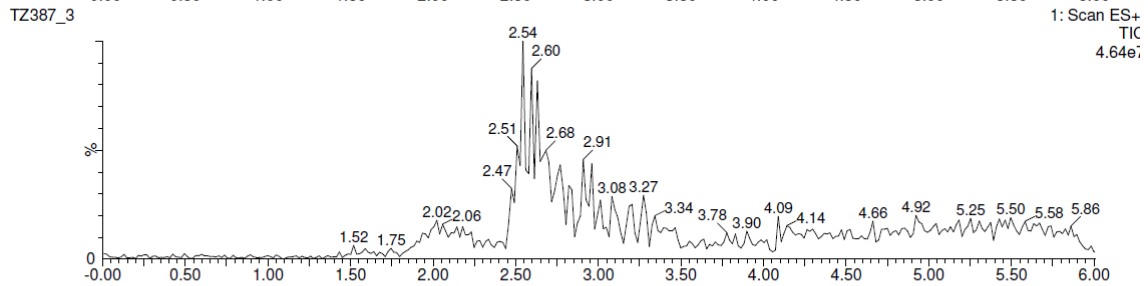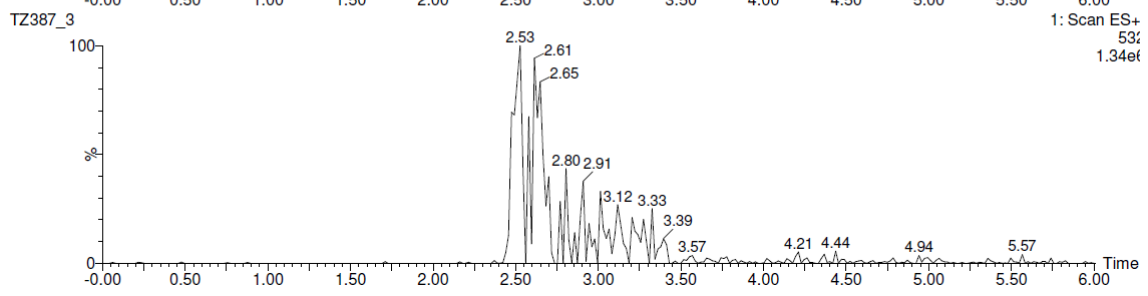

TZ387\_3\_Col3\_sol1\_5-30%\_6min  
TZ387\_3 147 (2.544) Cm (141:189)

1: Scan ES+  
7.26e8

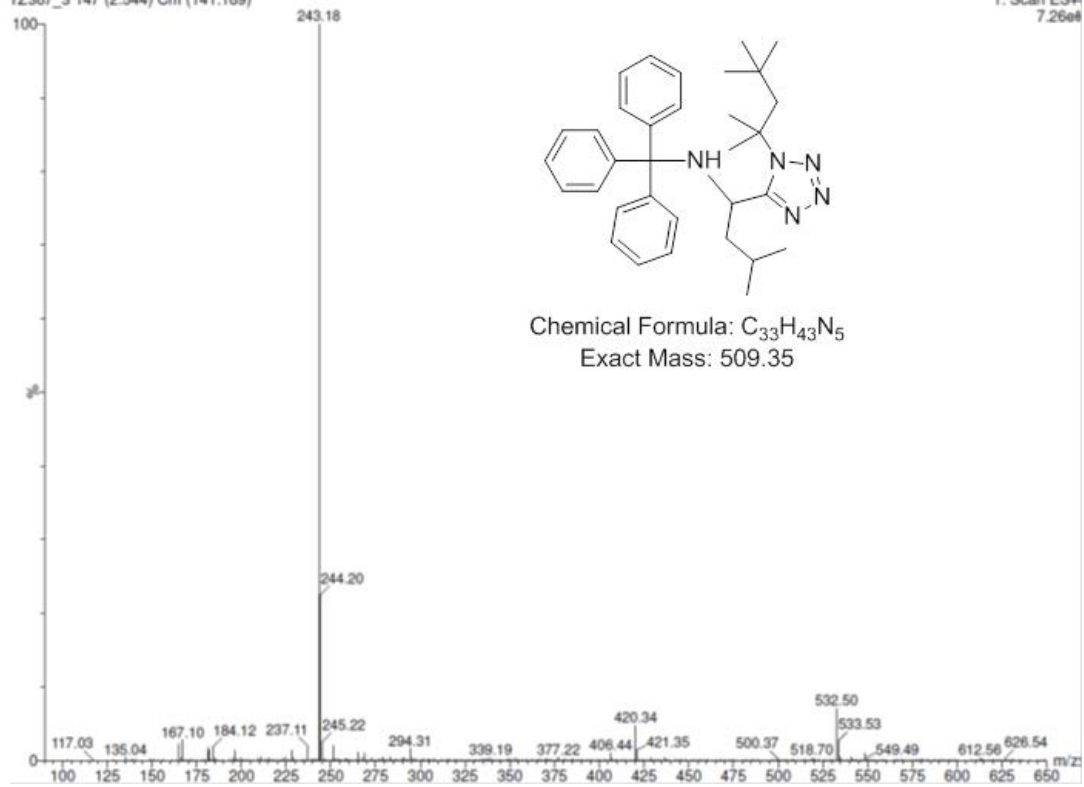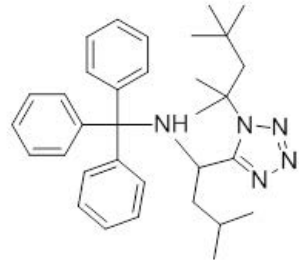

Chemical Formula:  $C_{33}H_{43}N_5$   
Exact Mass: 509.35

**3-(Methylthio)-1-(1-(2,4,4-trimethylpentan-2-yl)-1H-tetrazol-5-yl)-N-tritylpropan-1-amine**  
**(5g)**

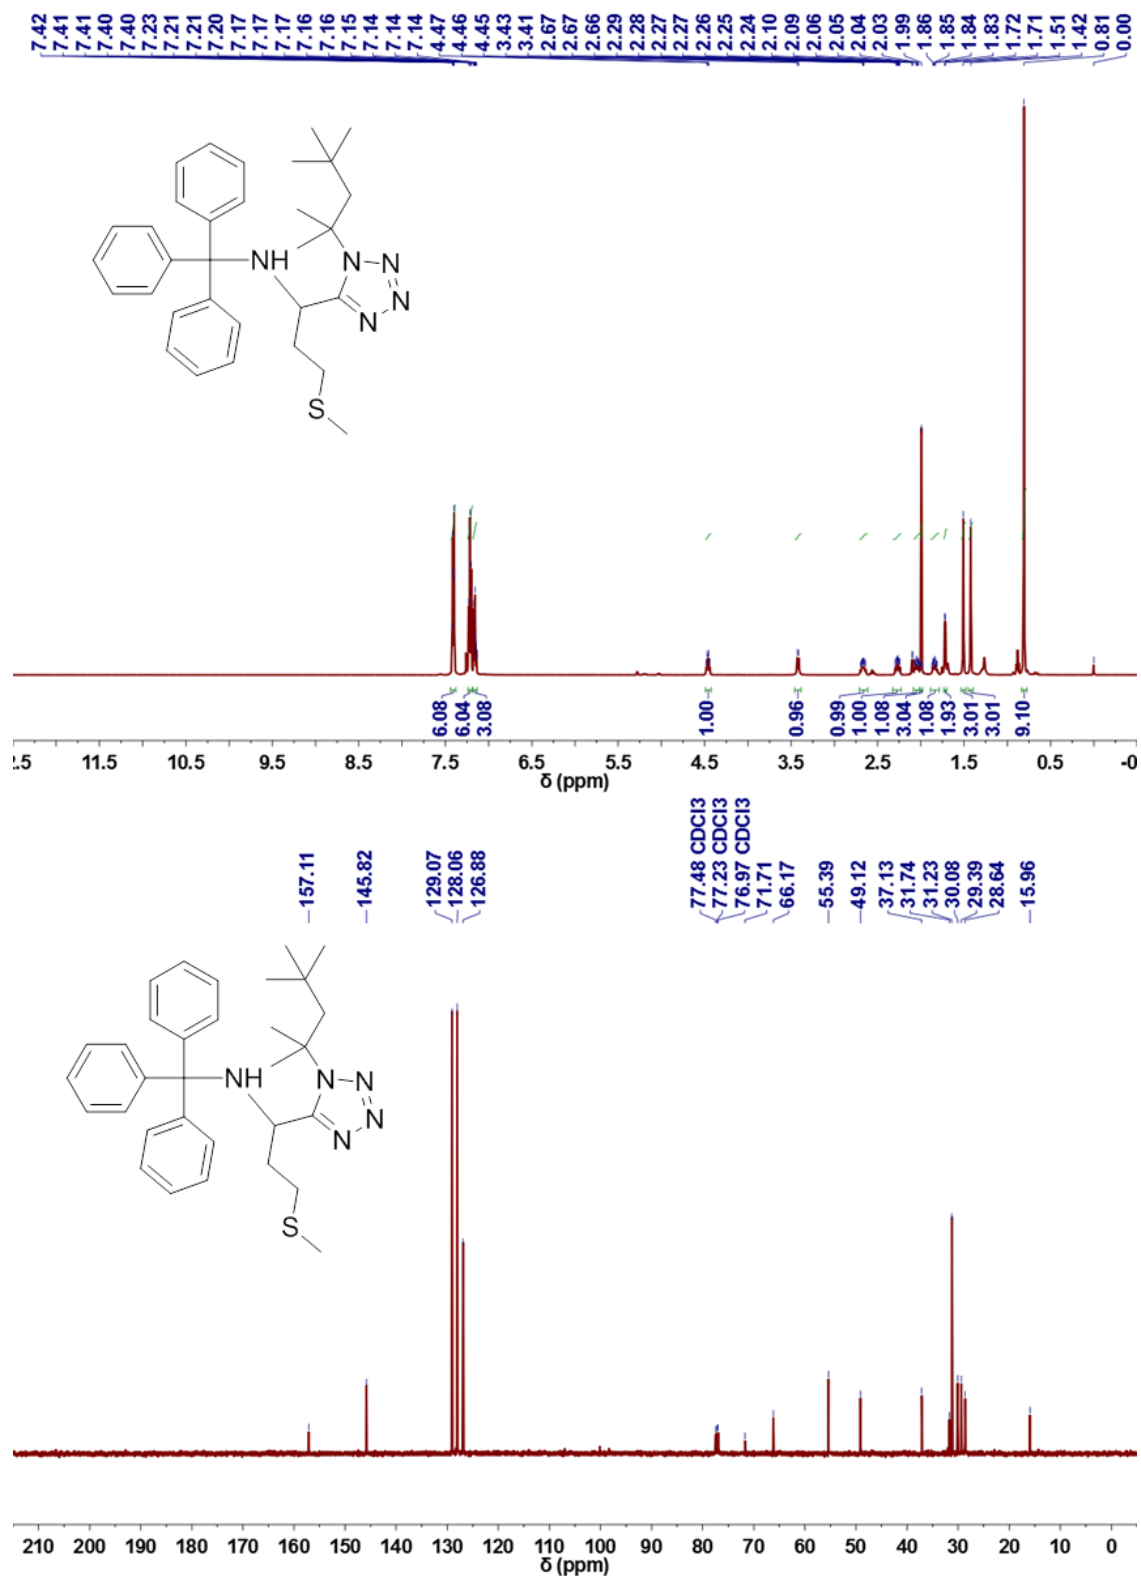

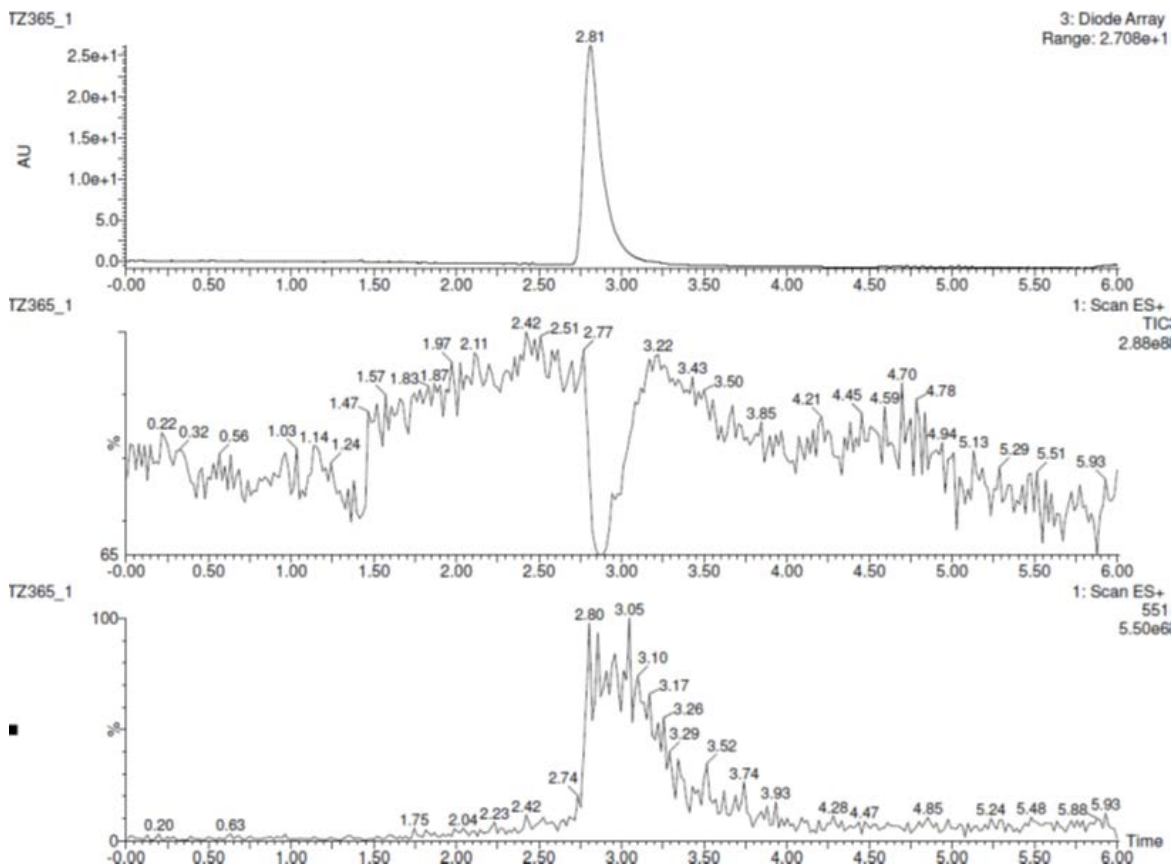

TZ365\_1\_Etpyr\_4.6X250\_MeOH\_5-30%\_6min  
TZ365\_1 160 (2.770) Cm (157.213)

1: Scan ES+  
5.95e1

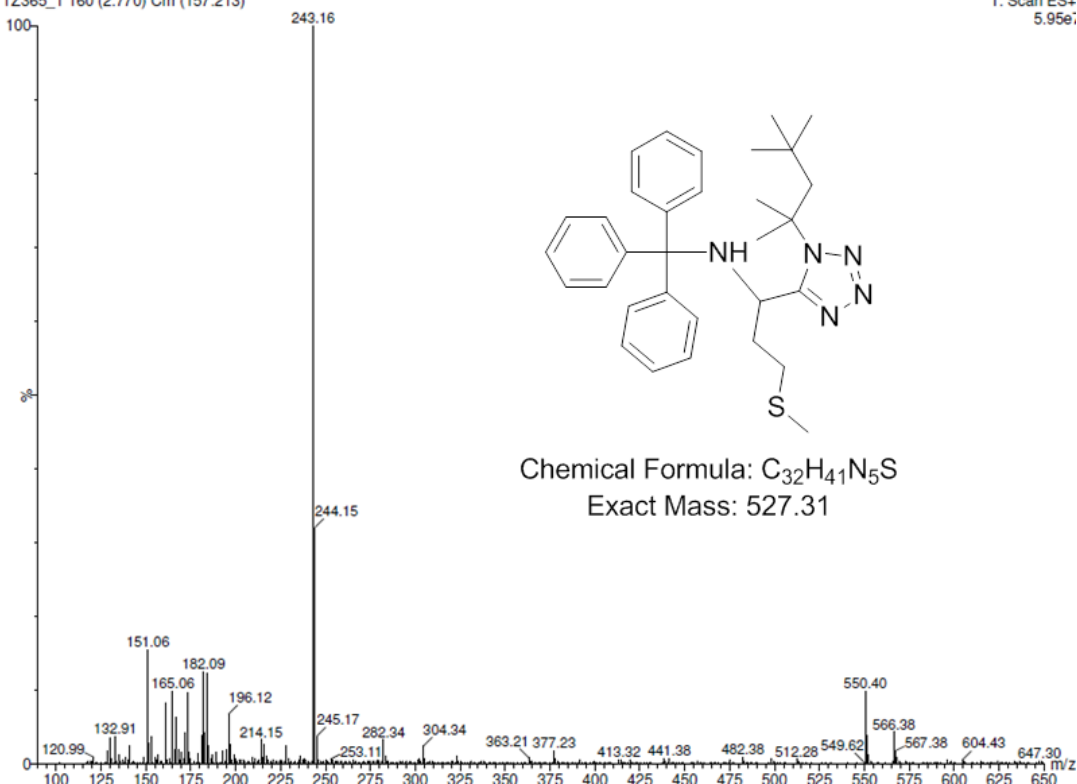

**2-Methyl-1-(1-(2, 4, 4-trimethylpentan-2-yl)-1H-tetrazol-5-yl)-N-tritylbutan-1-amine (5h)**

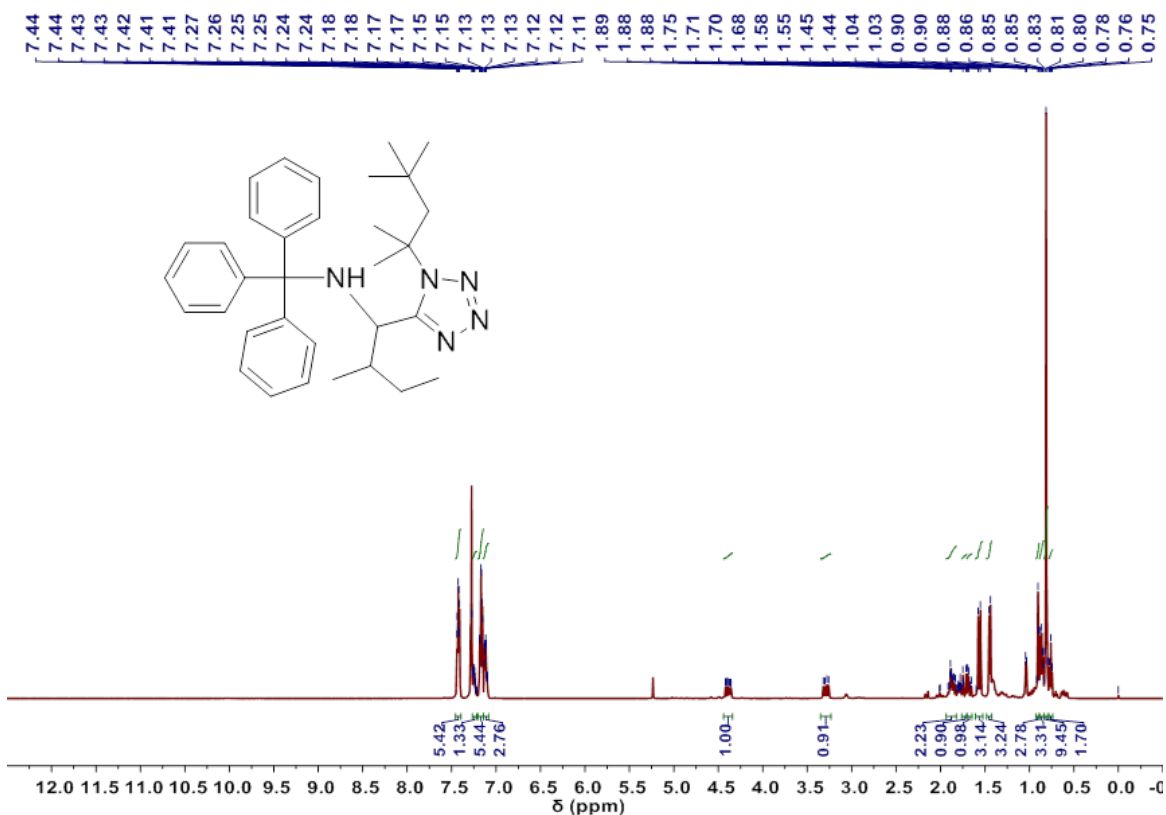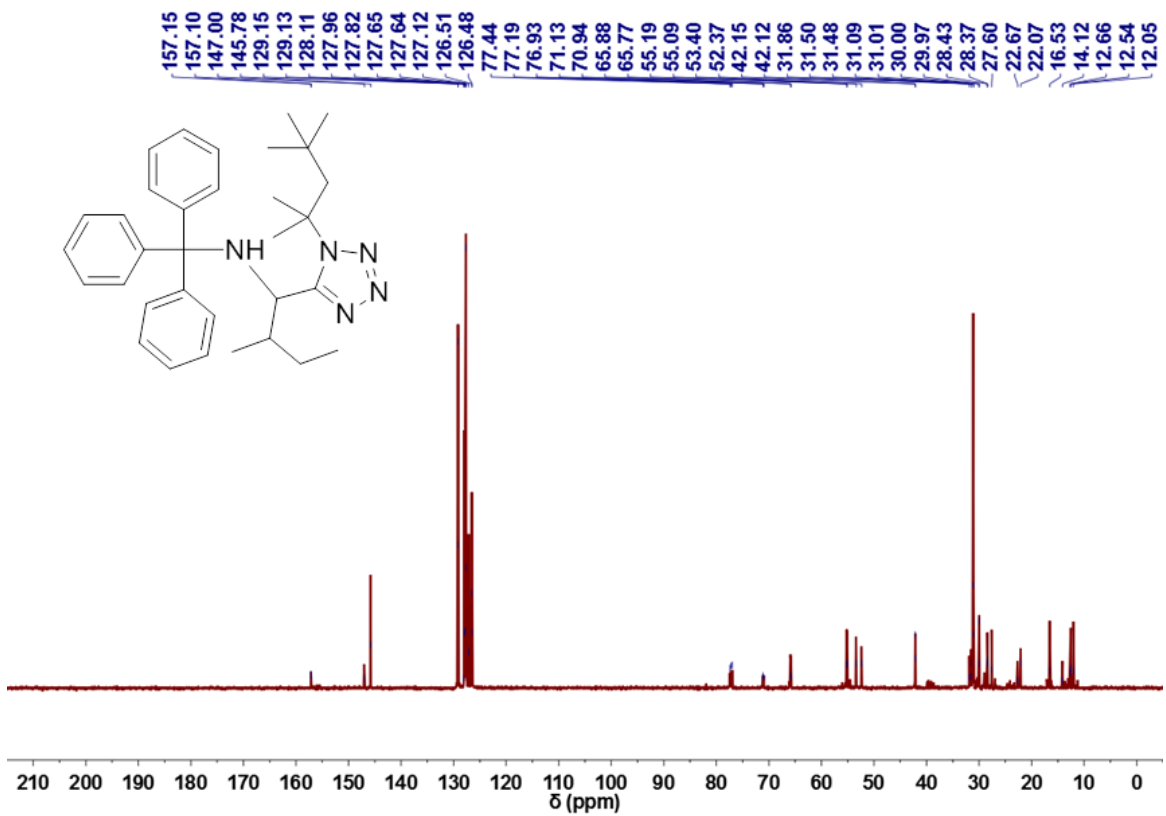

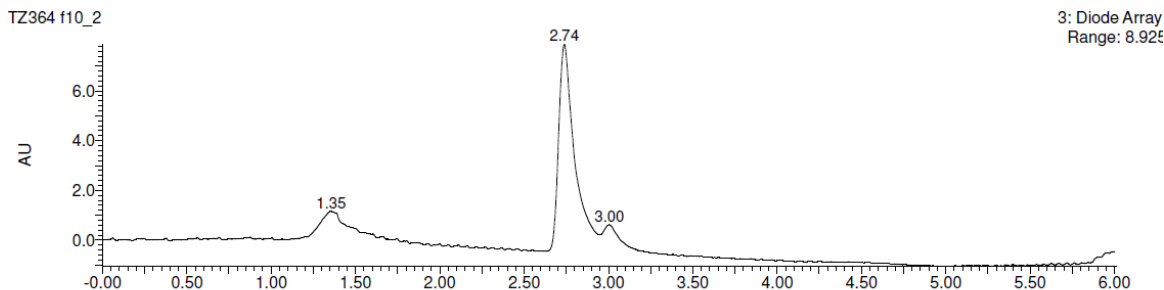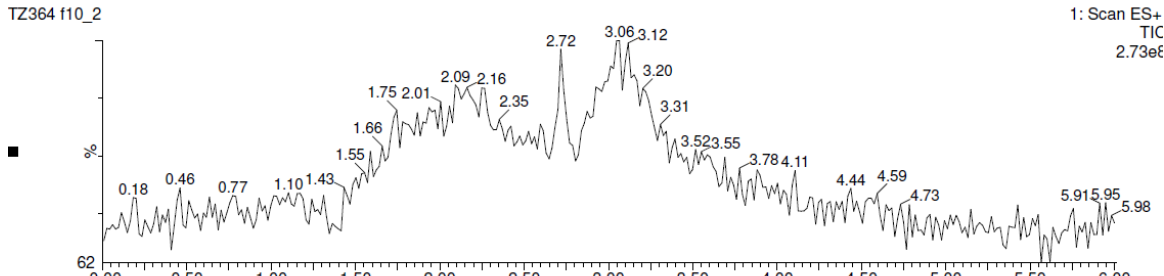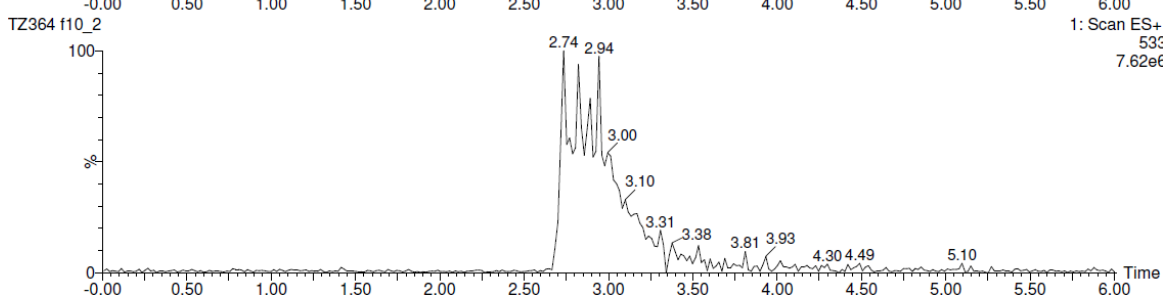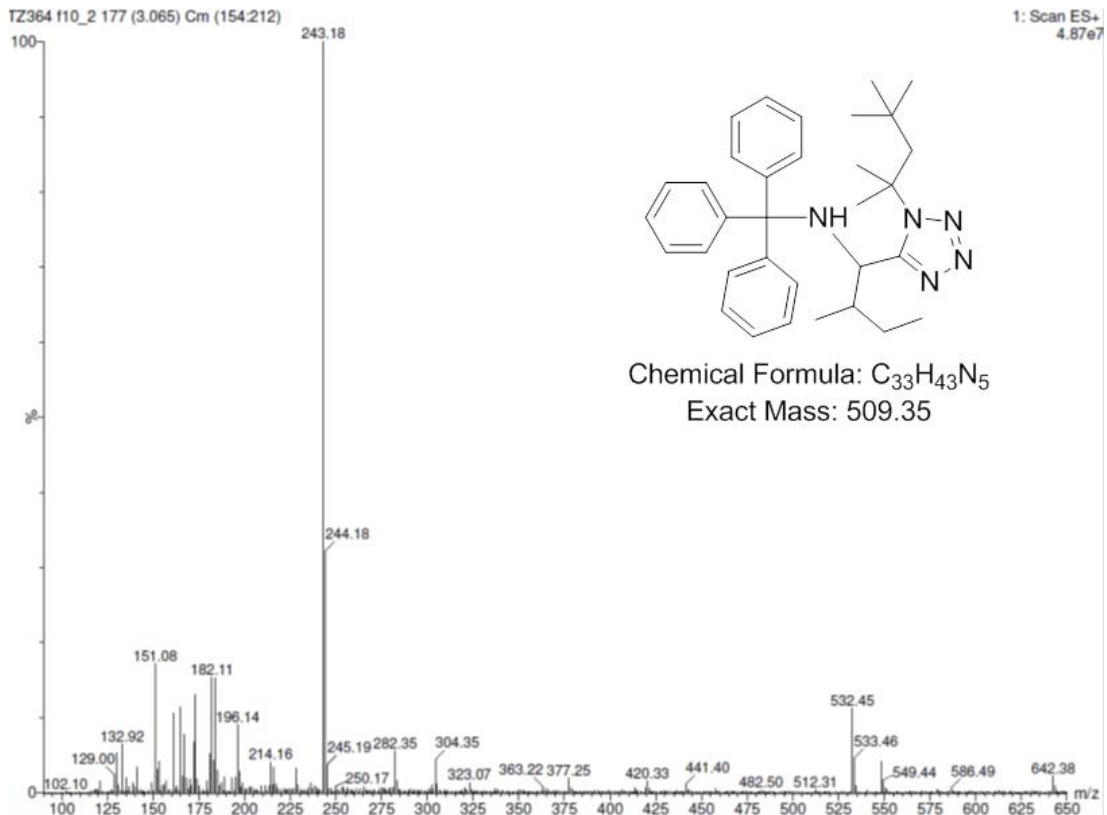

2-Methyl-1-(1-(2,4,4-trimethylpentan-2-yl)-1H-tetrazol-5-yl)-N-tritylpropan-1-amine (5i)

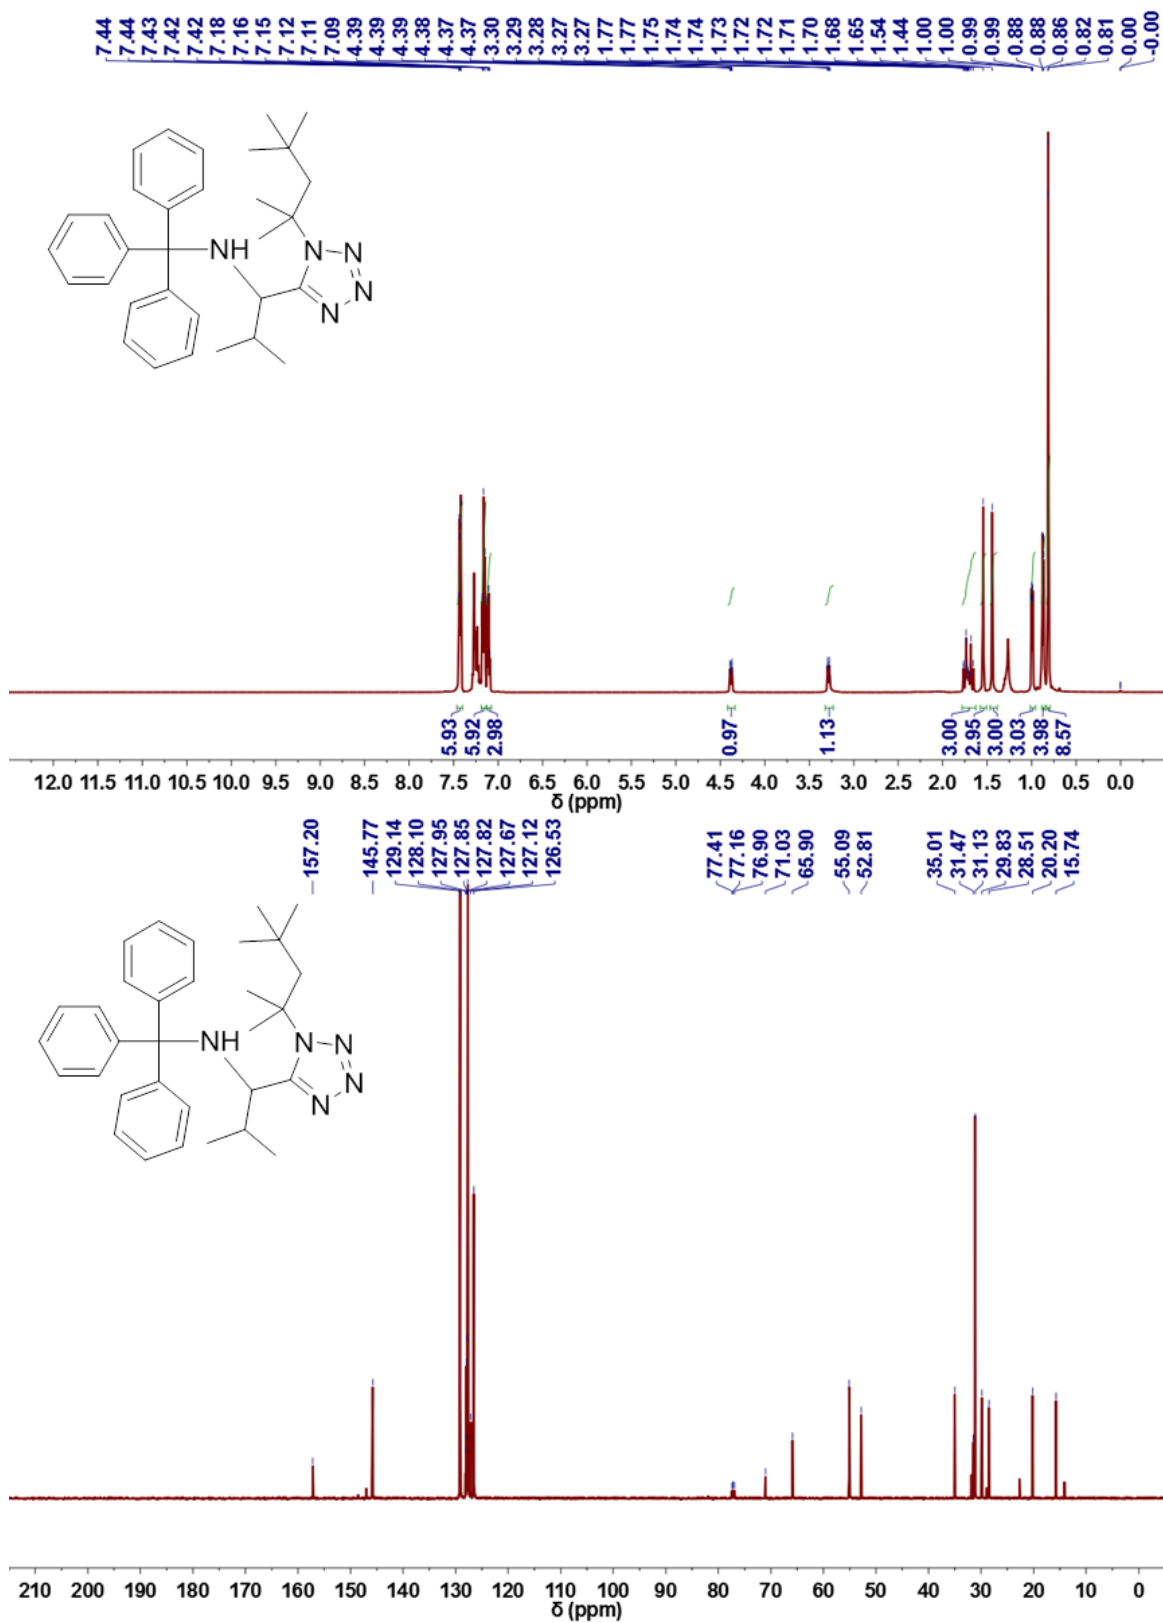



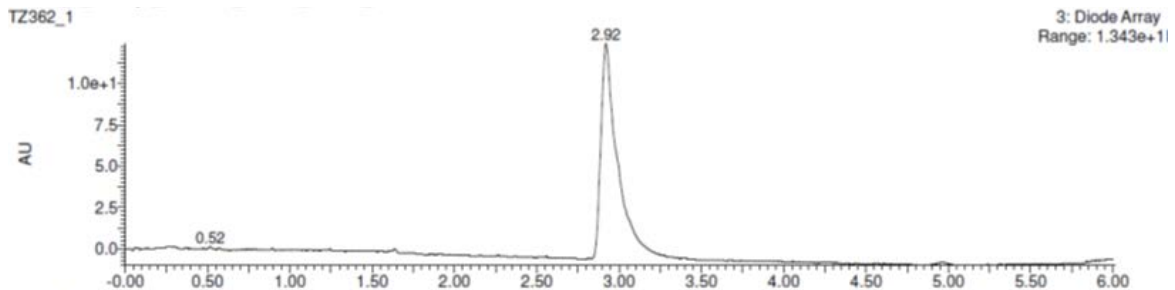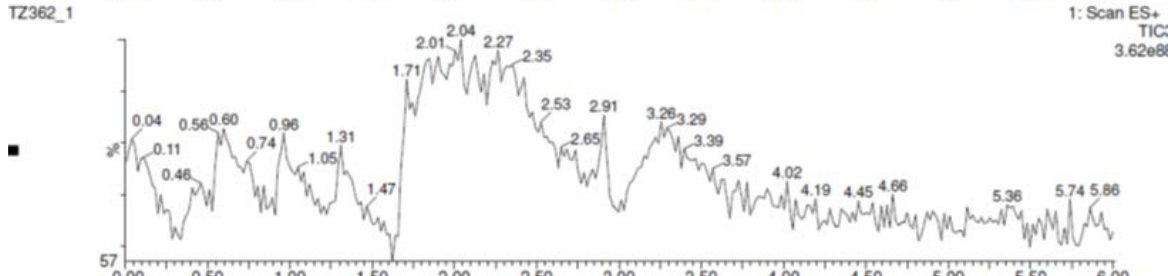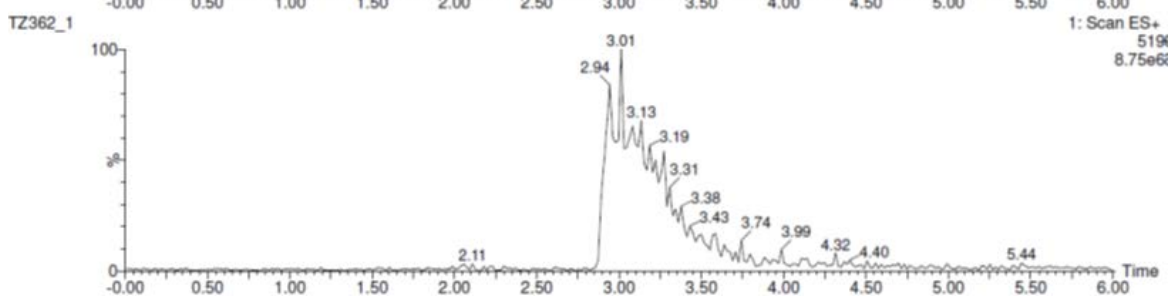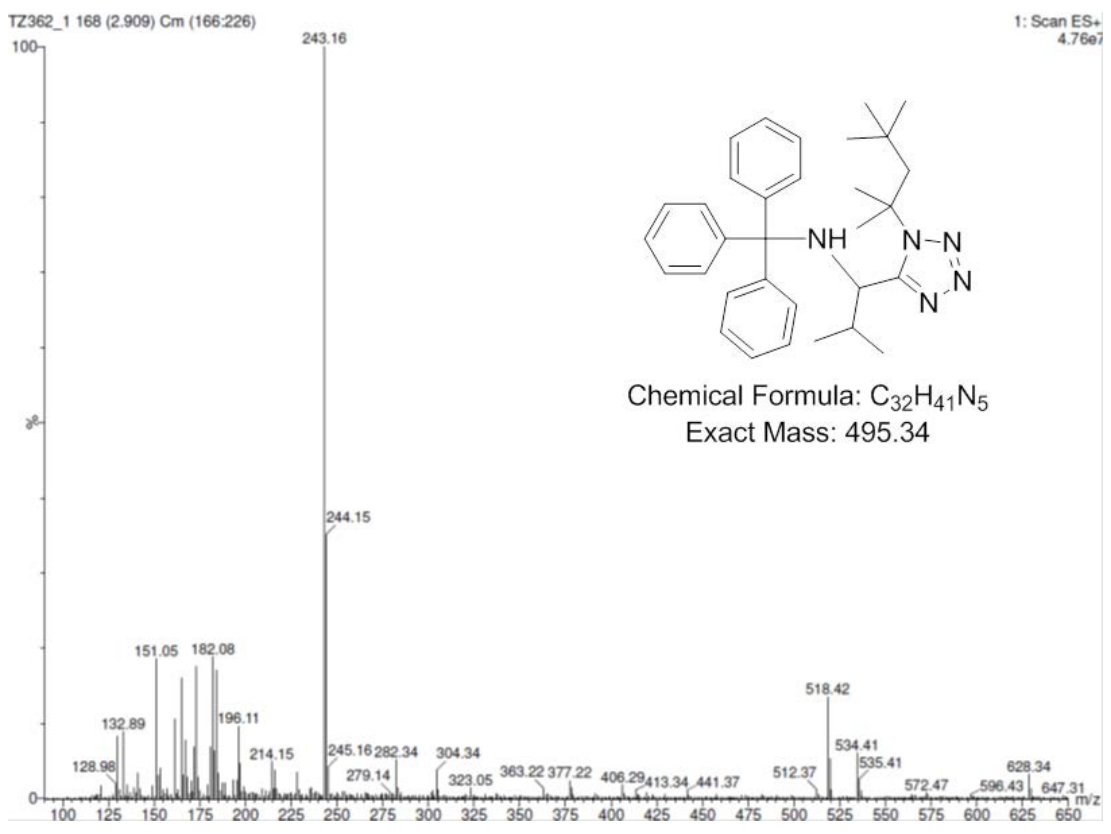

***N*-(Cyclopropyl(1-(2,4,4-trimethylpentan-2-yl)-1H-tetrazol-5-yl)methyl)-1,1,1-triphenylmethanamine (5j)**

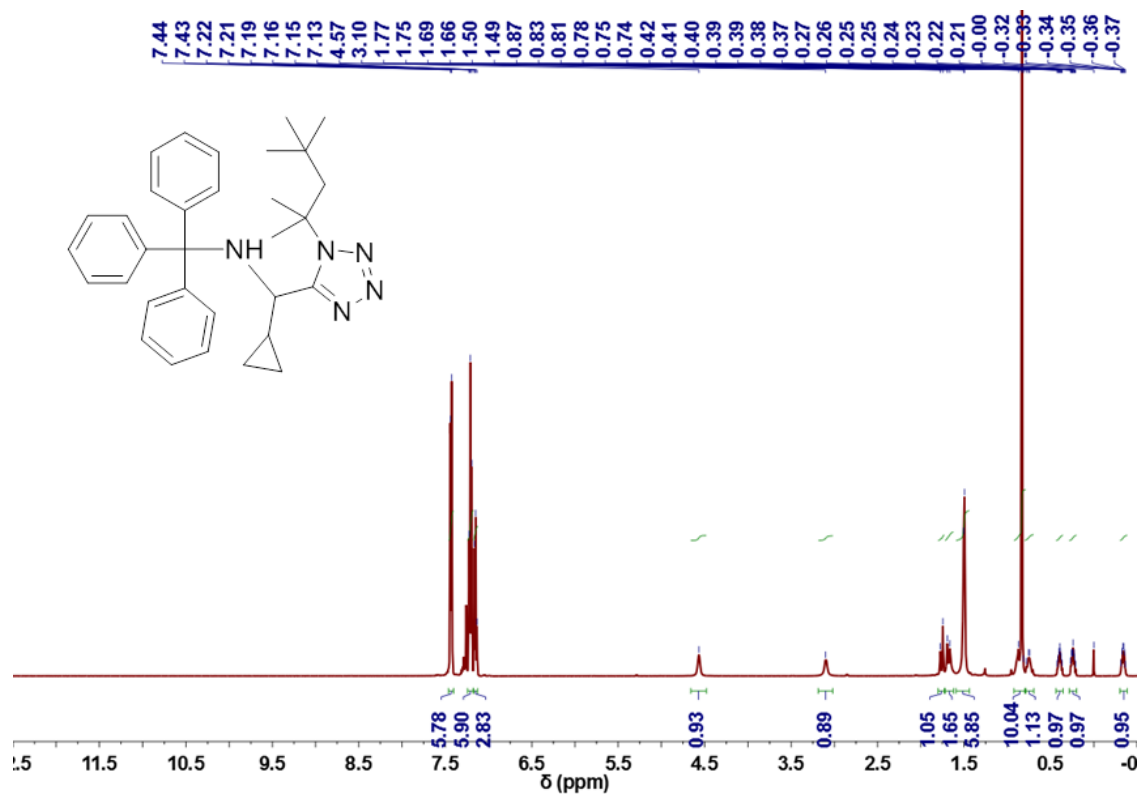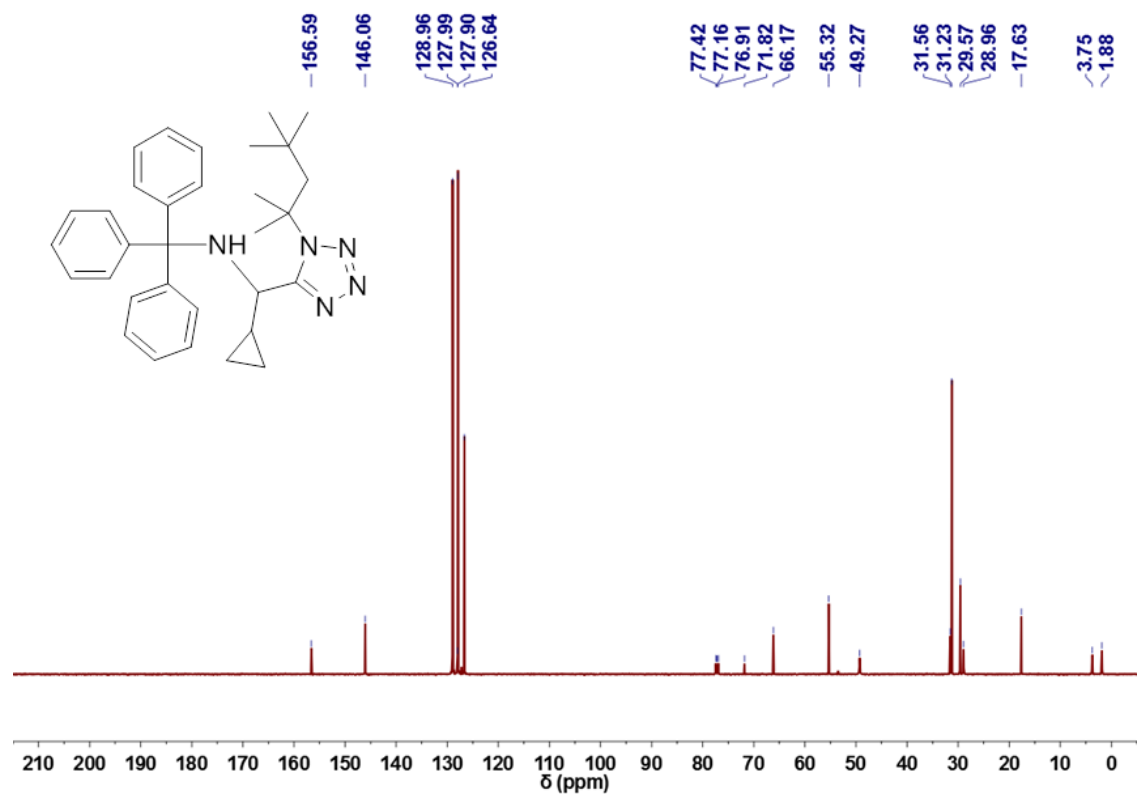

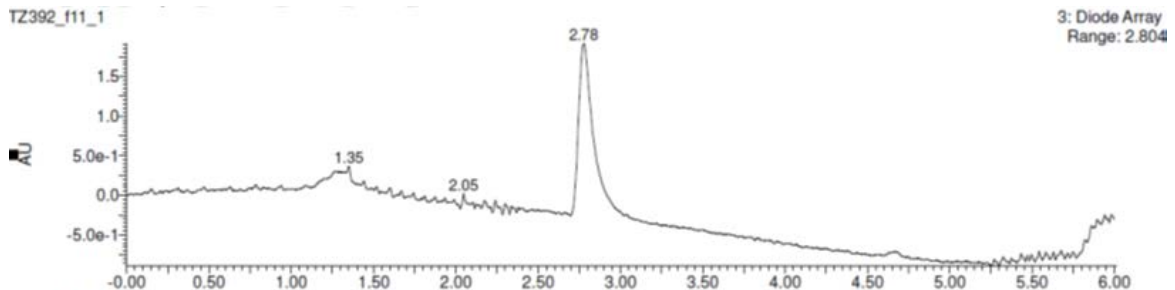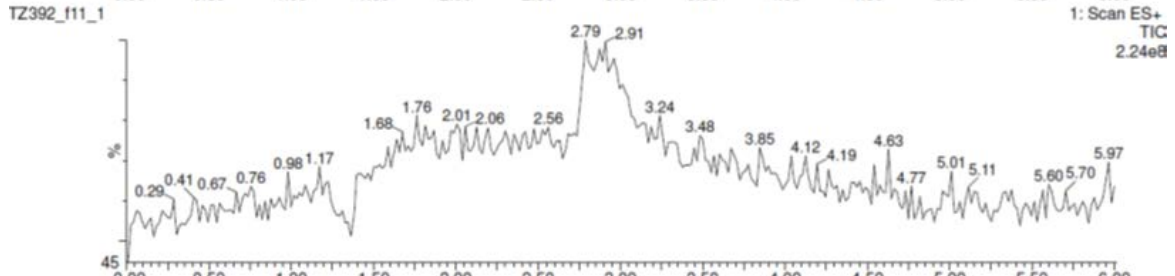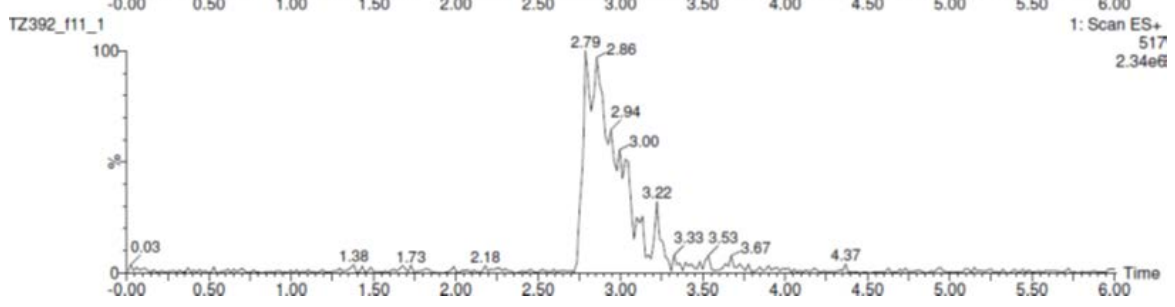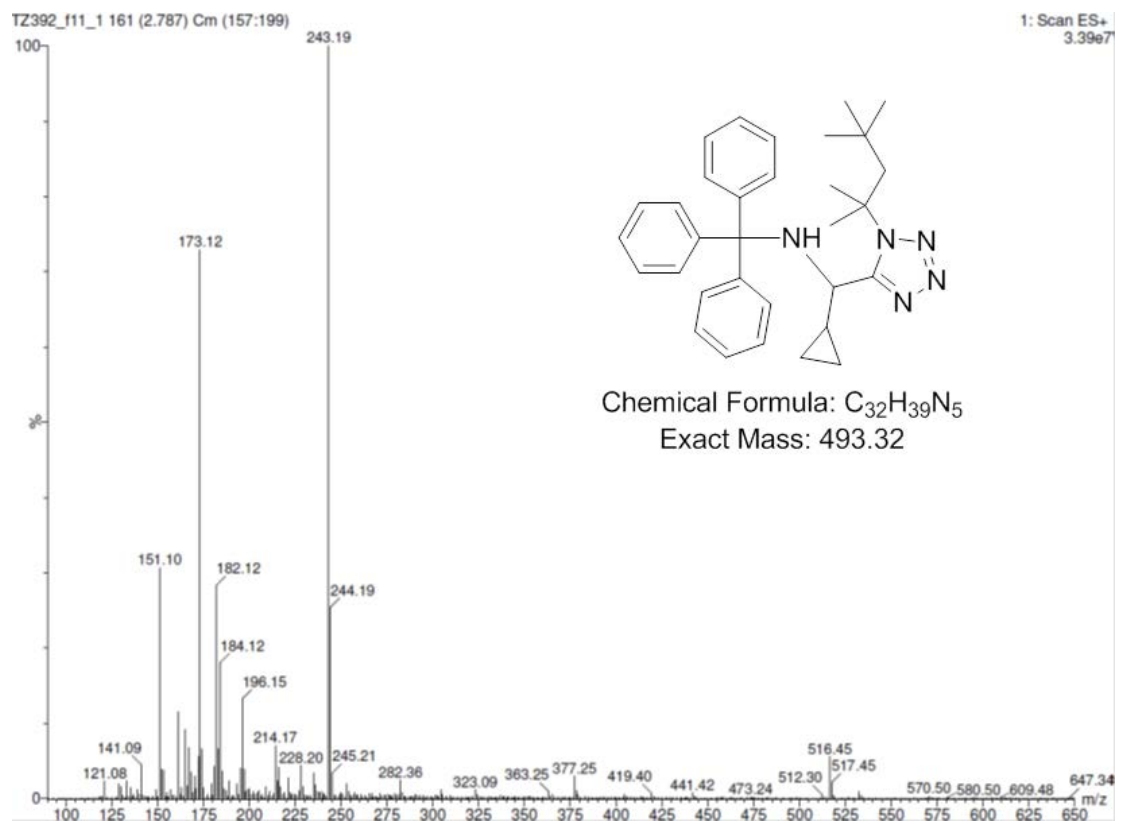

***N*-(Cyclohexyl(1-(2,4,4-trimethylpentan-2-yl)-1H-tetrazol-5-yl)methyl)-1,1,1-triphenylmethanamine (5k)**

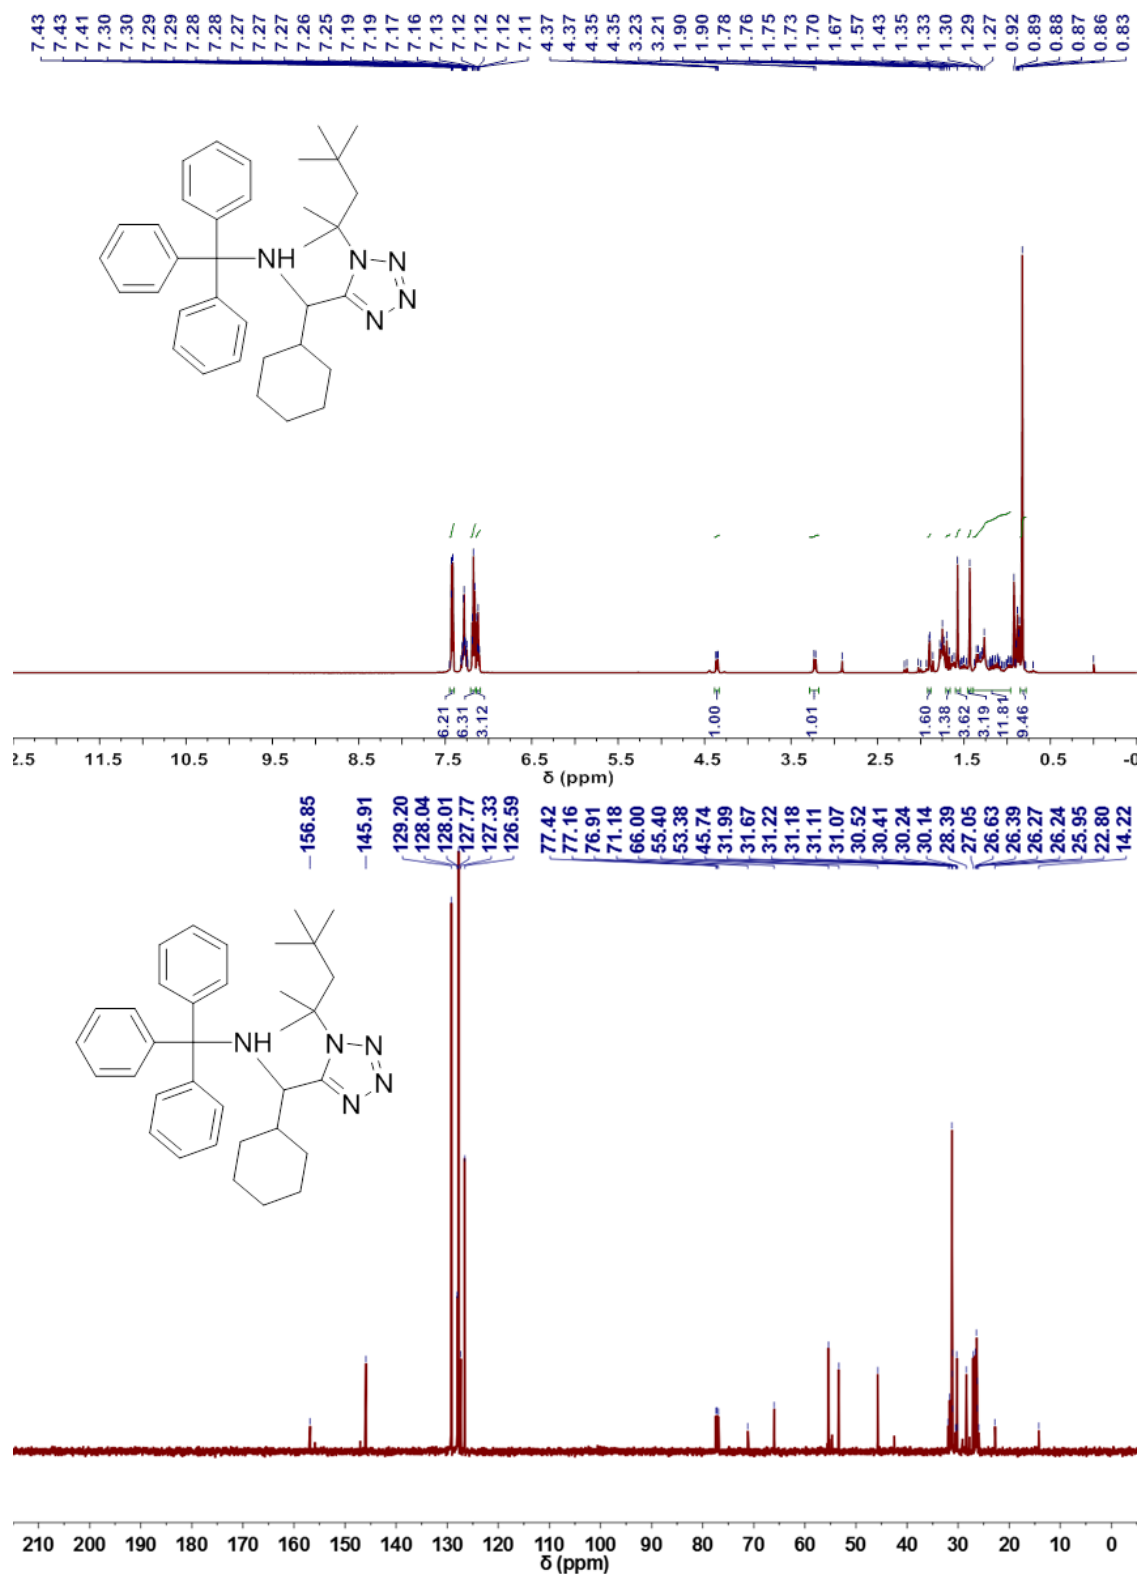

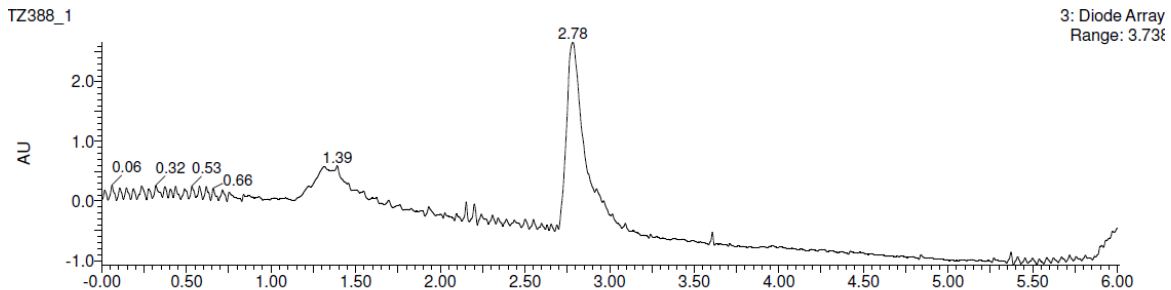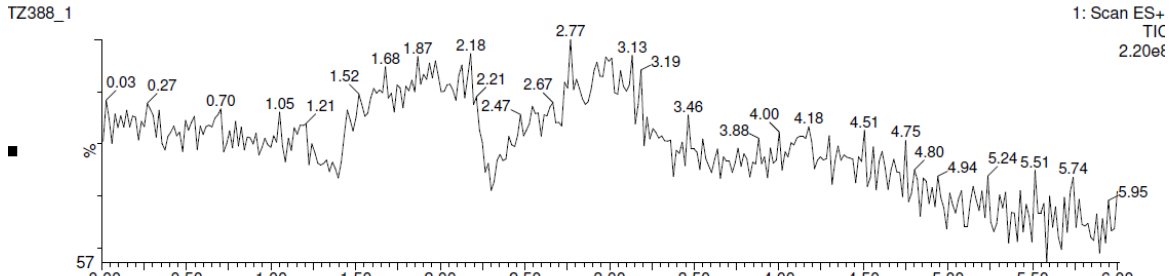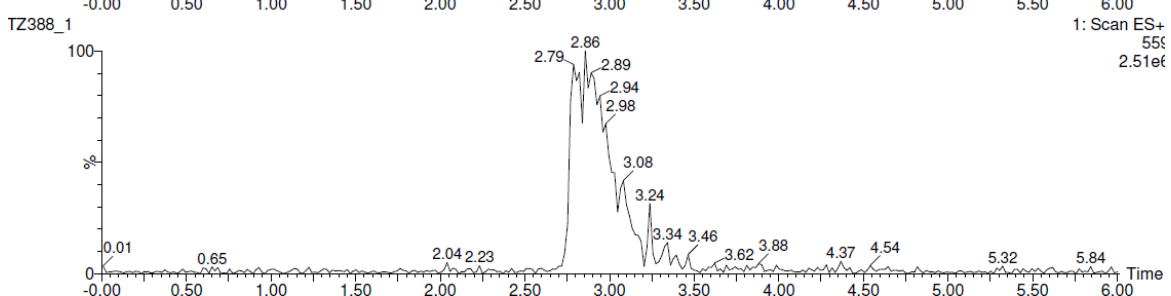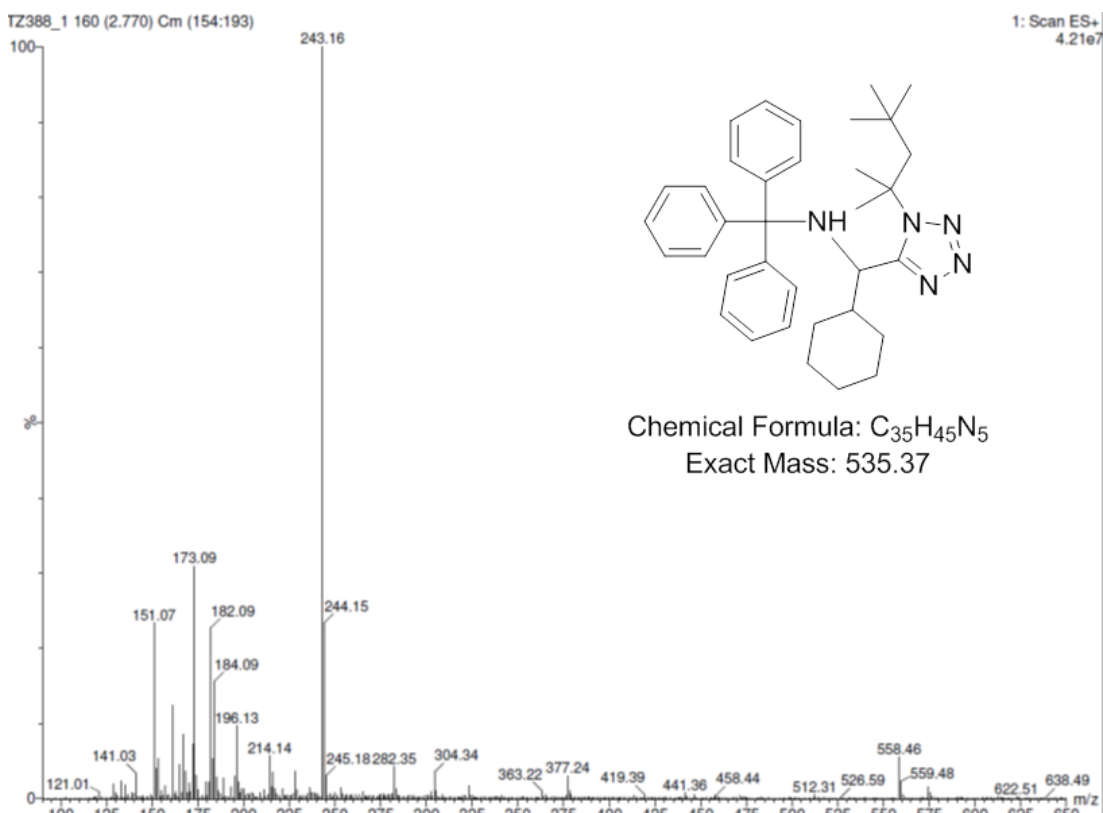

**3-Phenyl-1-(1-(2,4,4-trimethylpentan-2-yl)-1H-tetrazol-5-yl)-N-tritylpropan-1-amine (5l)**

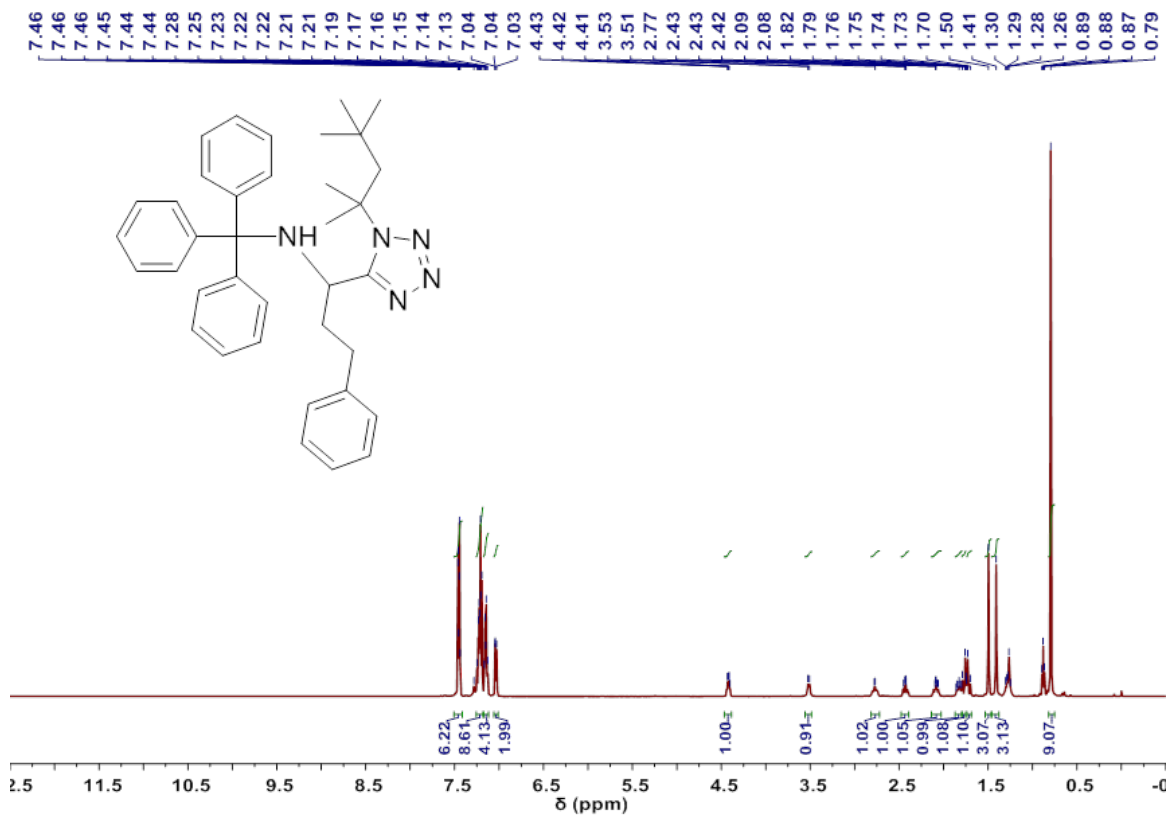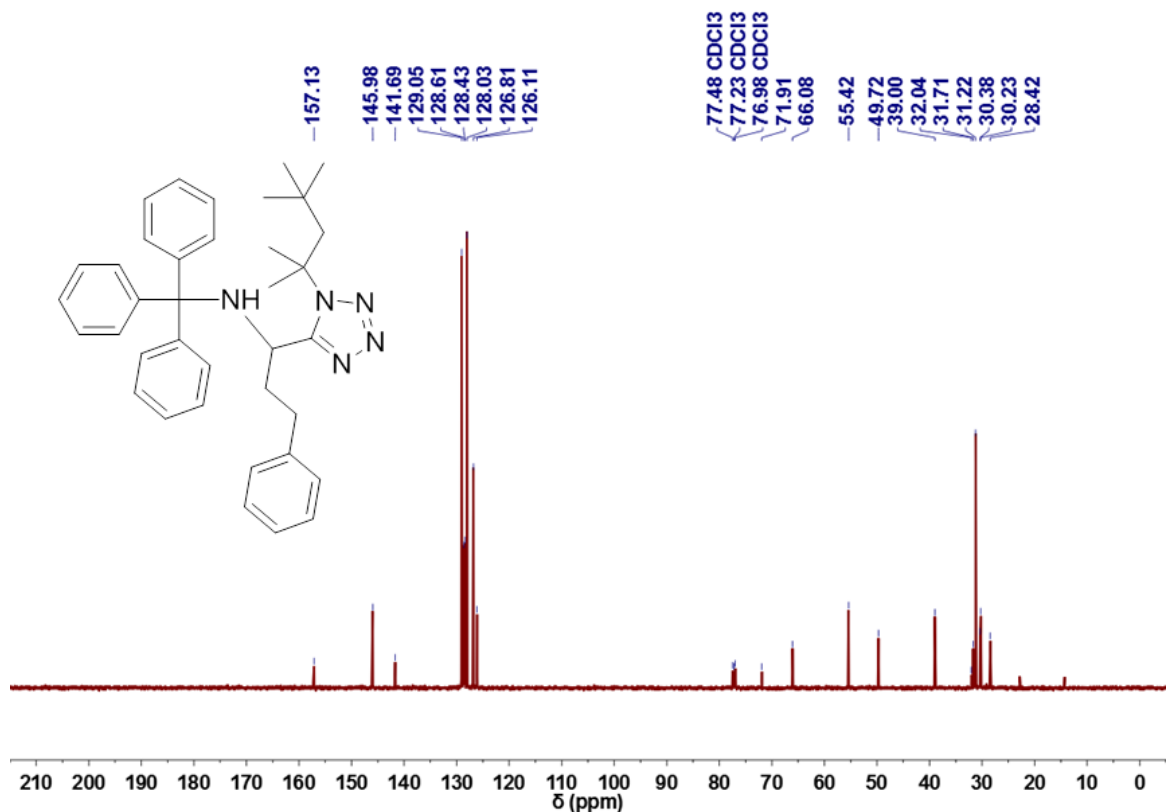

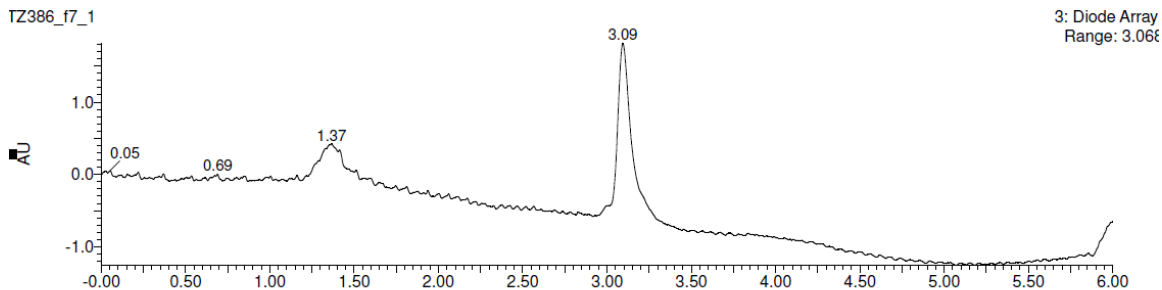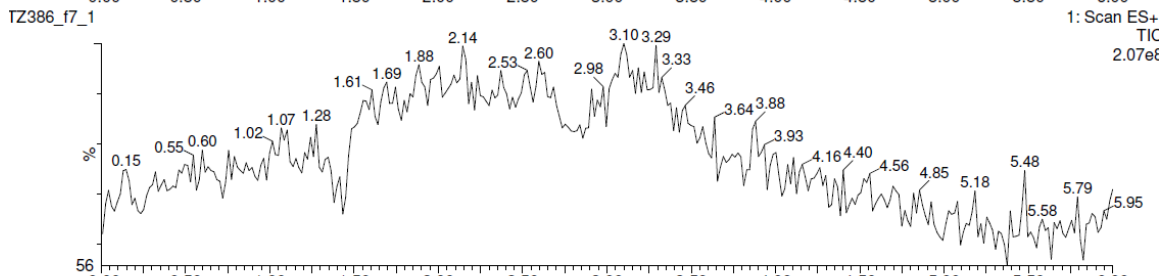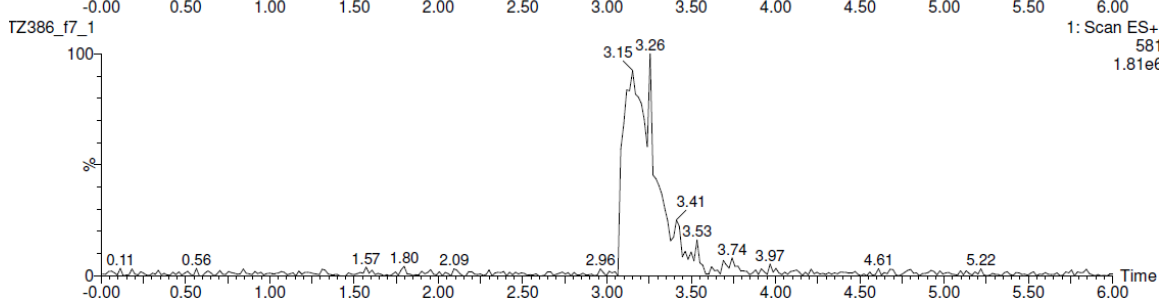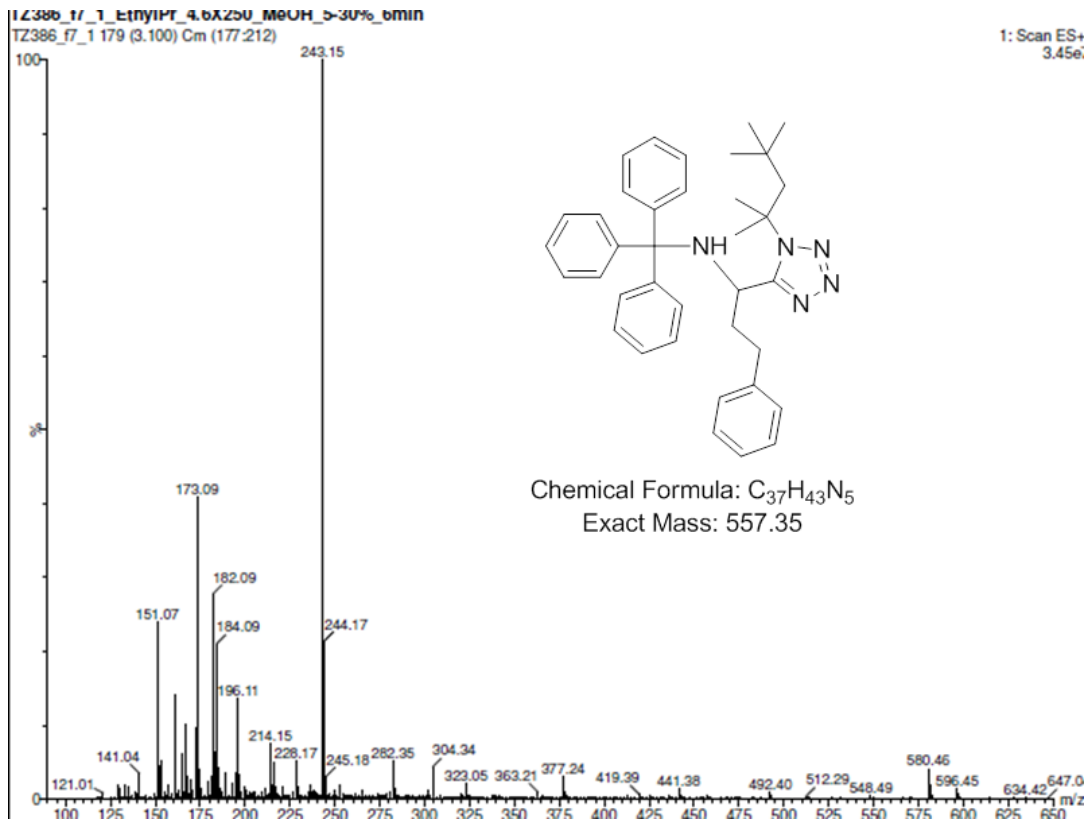

Methyl 4-(1-benzyl-1H-tetrazol-5-yl)-4-(tritylamino)butanoate (5m)

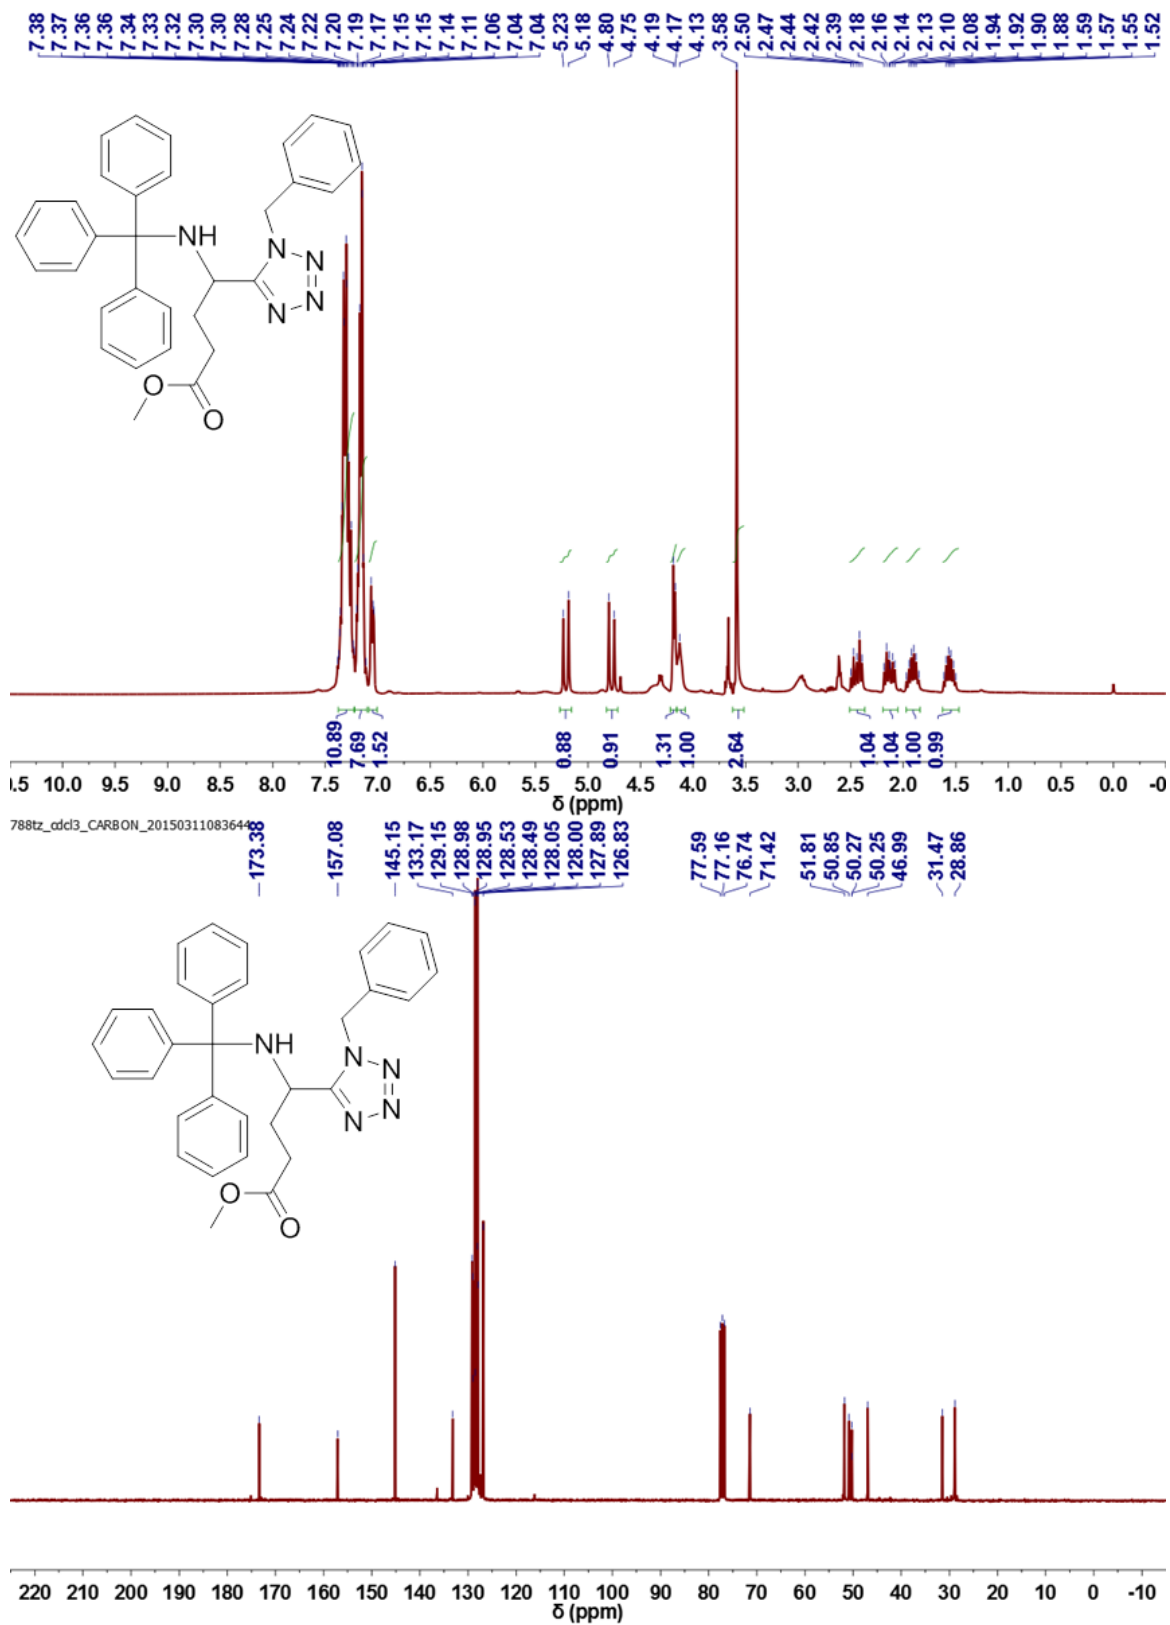



TZ788\_2\_Col4\_Sol1\_5-30%\_6min  
TZ788\_2

3: Diode Array  
Range: 4.09e+1

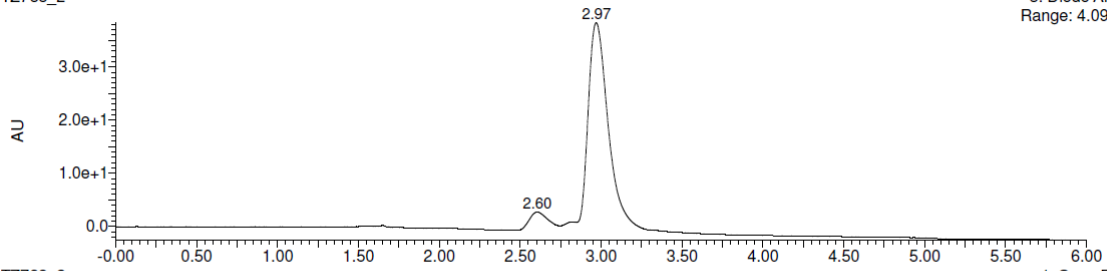

TZ788\_2  
1: Scan ES+ TIC  
3.58e7

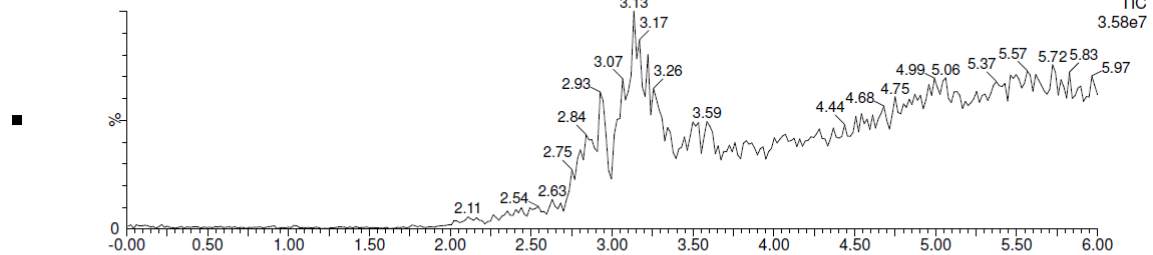

TZ788\_2  
1: Scan ES+  
540  
5.79e6

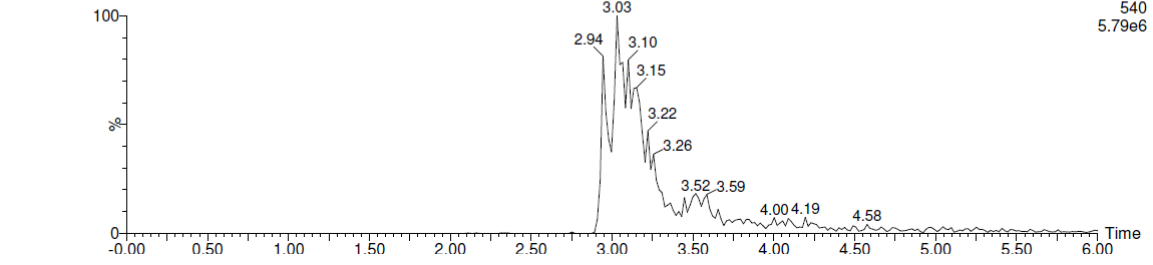

TZ788\_2\_Col4\_Sol1\_5-30%\_6min  
TZ788\_2\_177 (3.065)

1: Scan ES+  
1.05e7

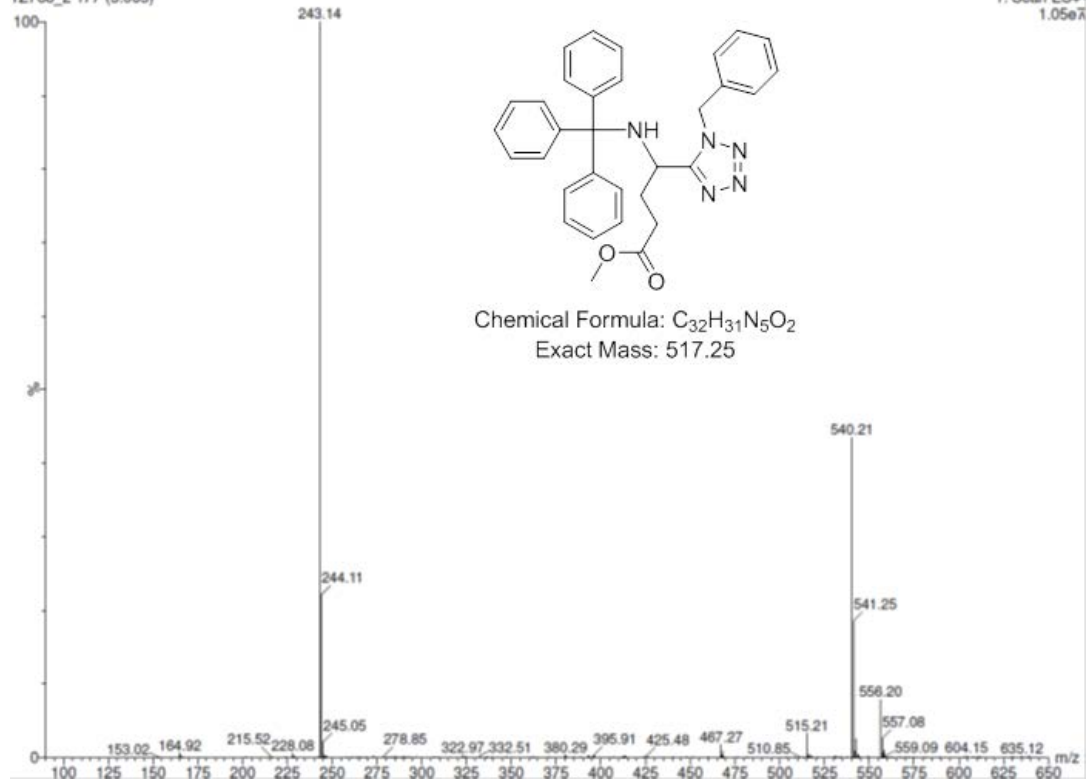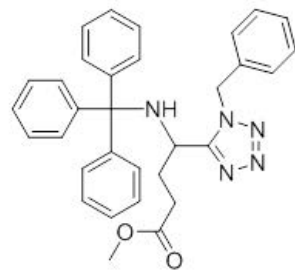

Chemical Formula: C<sub>32</sub>H<sub>31</sub>N<sub>5</sub>O<sub>2</sub>  
Exact Mass: 517.25

4-(1-Benzyl-1H-tetrazol-5-yl)-4-(tritylamino)butanamide (5m')

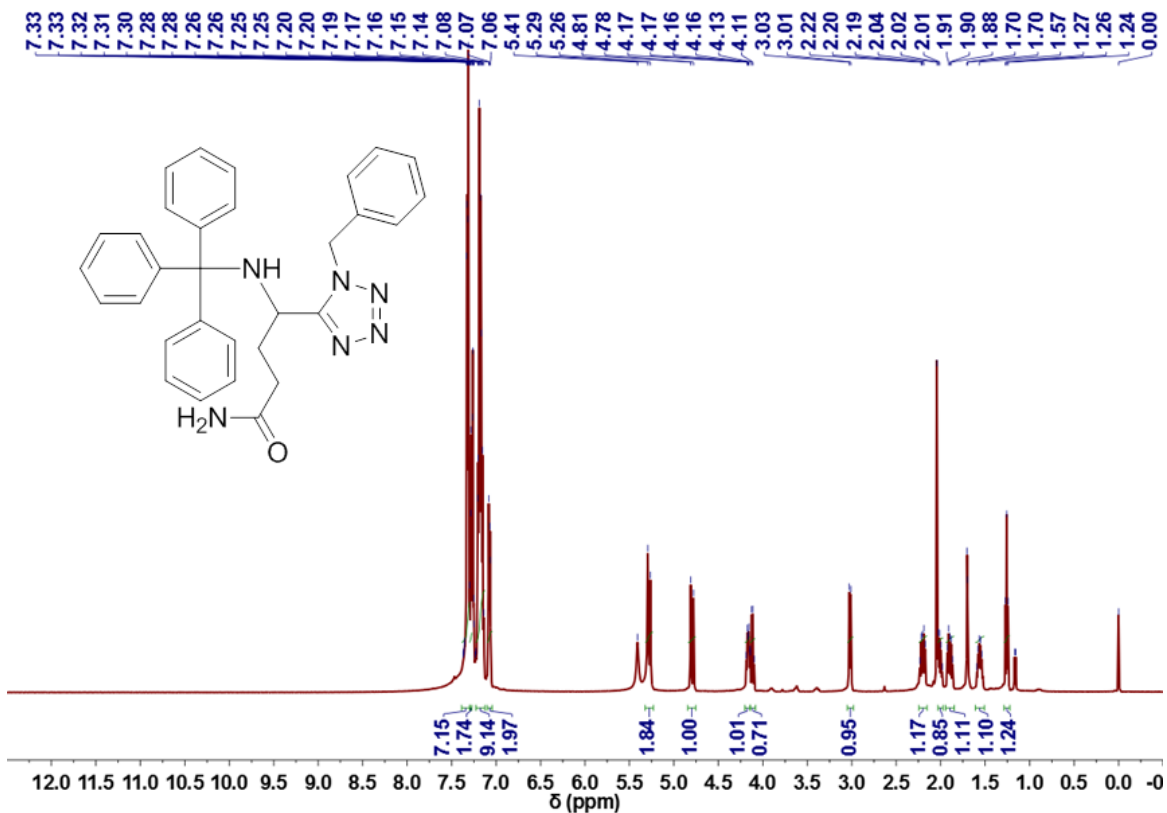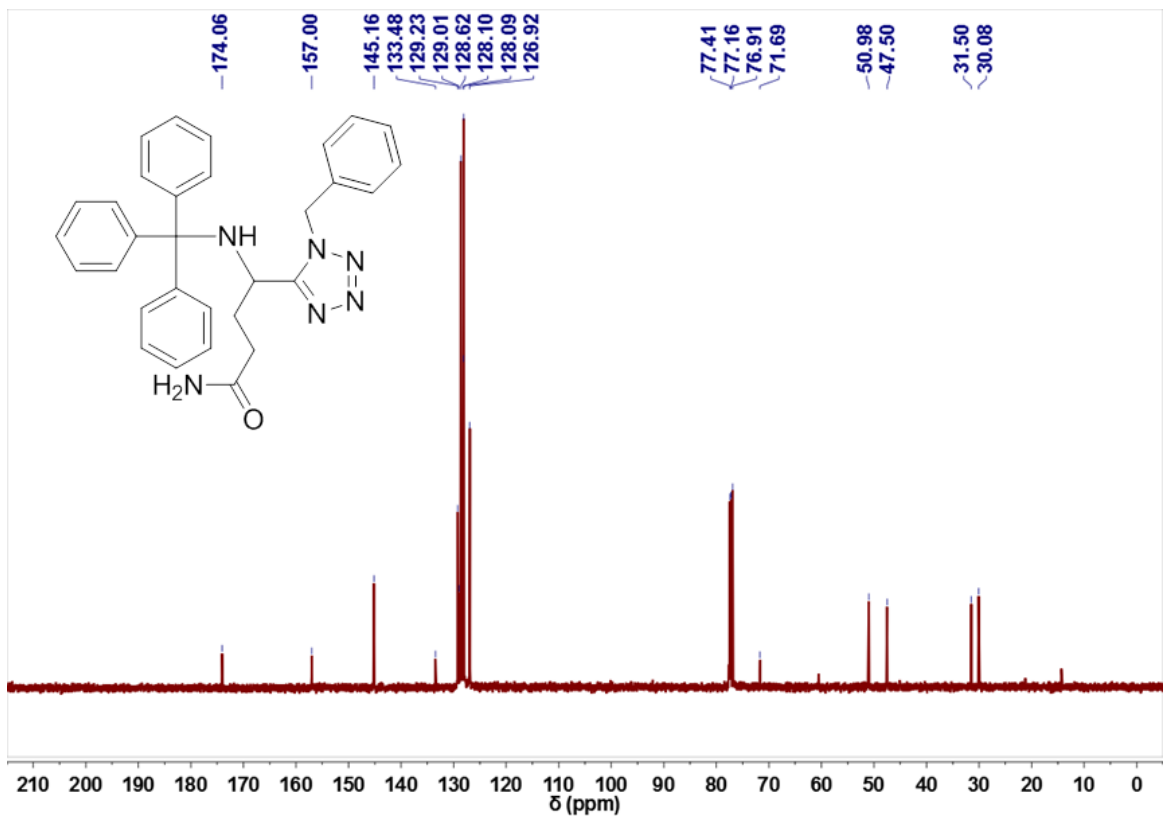

TZ790\_2\_Col4\_sol1\_5-30%\_6min

TZ790\_2

3: Diode Array  
Range: 2.179e+

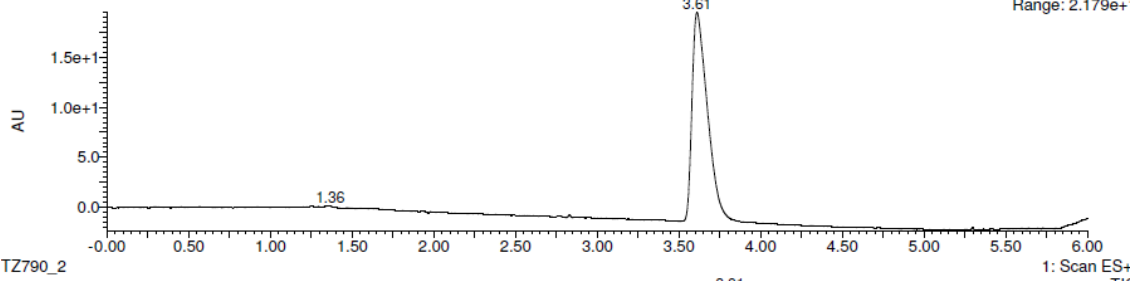

TZ790\_2

1: Scan ES+  
TIC  
4.10e

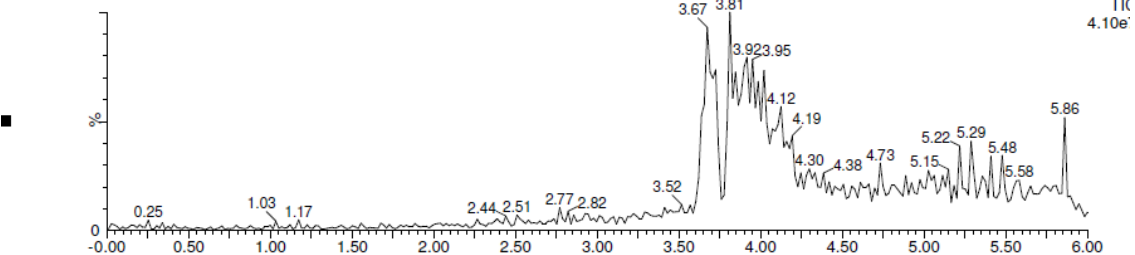

TZ790\_2

1: Scan ES+  
52  
6.86e

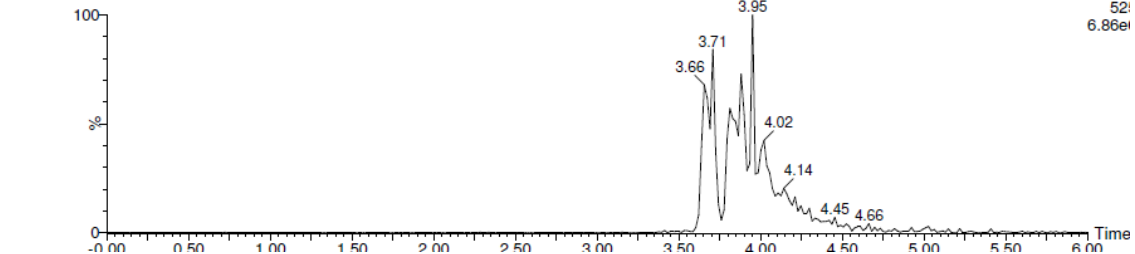

TZ790\_1\_Col4\_Sol5\_30%\_6min

TZ790\_1 213 (3.690) Cm (211:231)

1: Scan ES+  
7.02e6

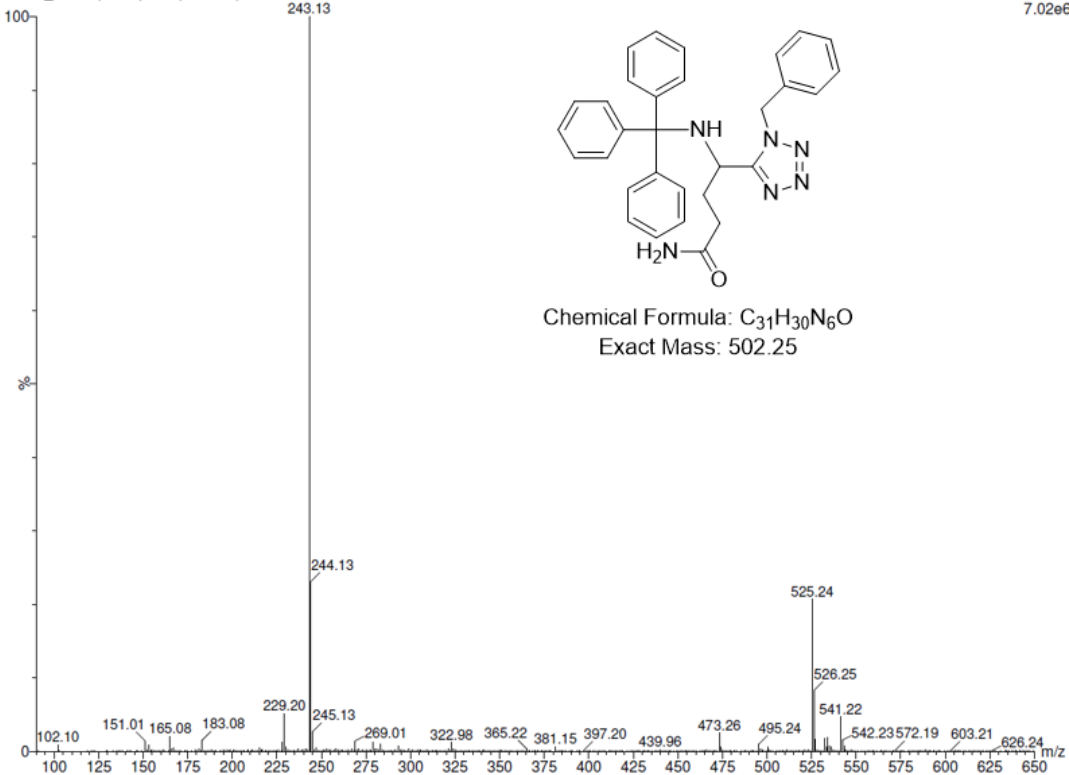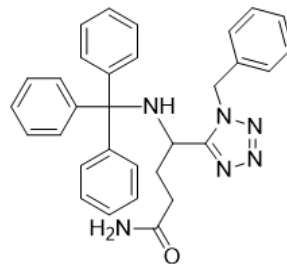

Chemical Formula: C<sub>31</sub>H<sub>30</sub>N<sub>6</sub>O

Exact Mass: 502.25

1-Benzyl-5-(1-benzyl-1H-tetrazol-5-yl)pyrrolidin-2-one (5m'')

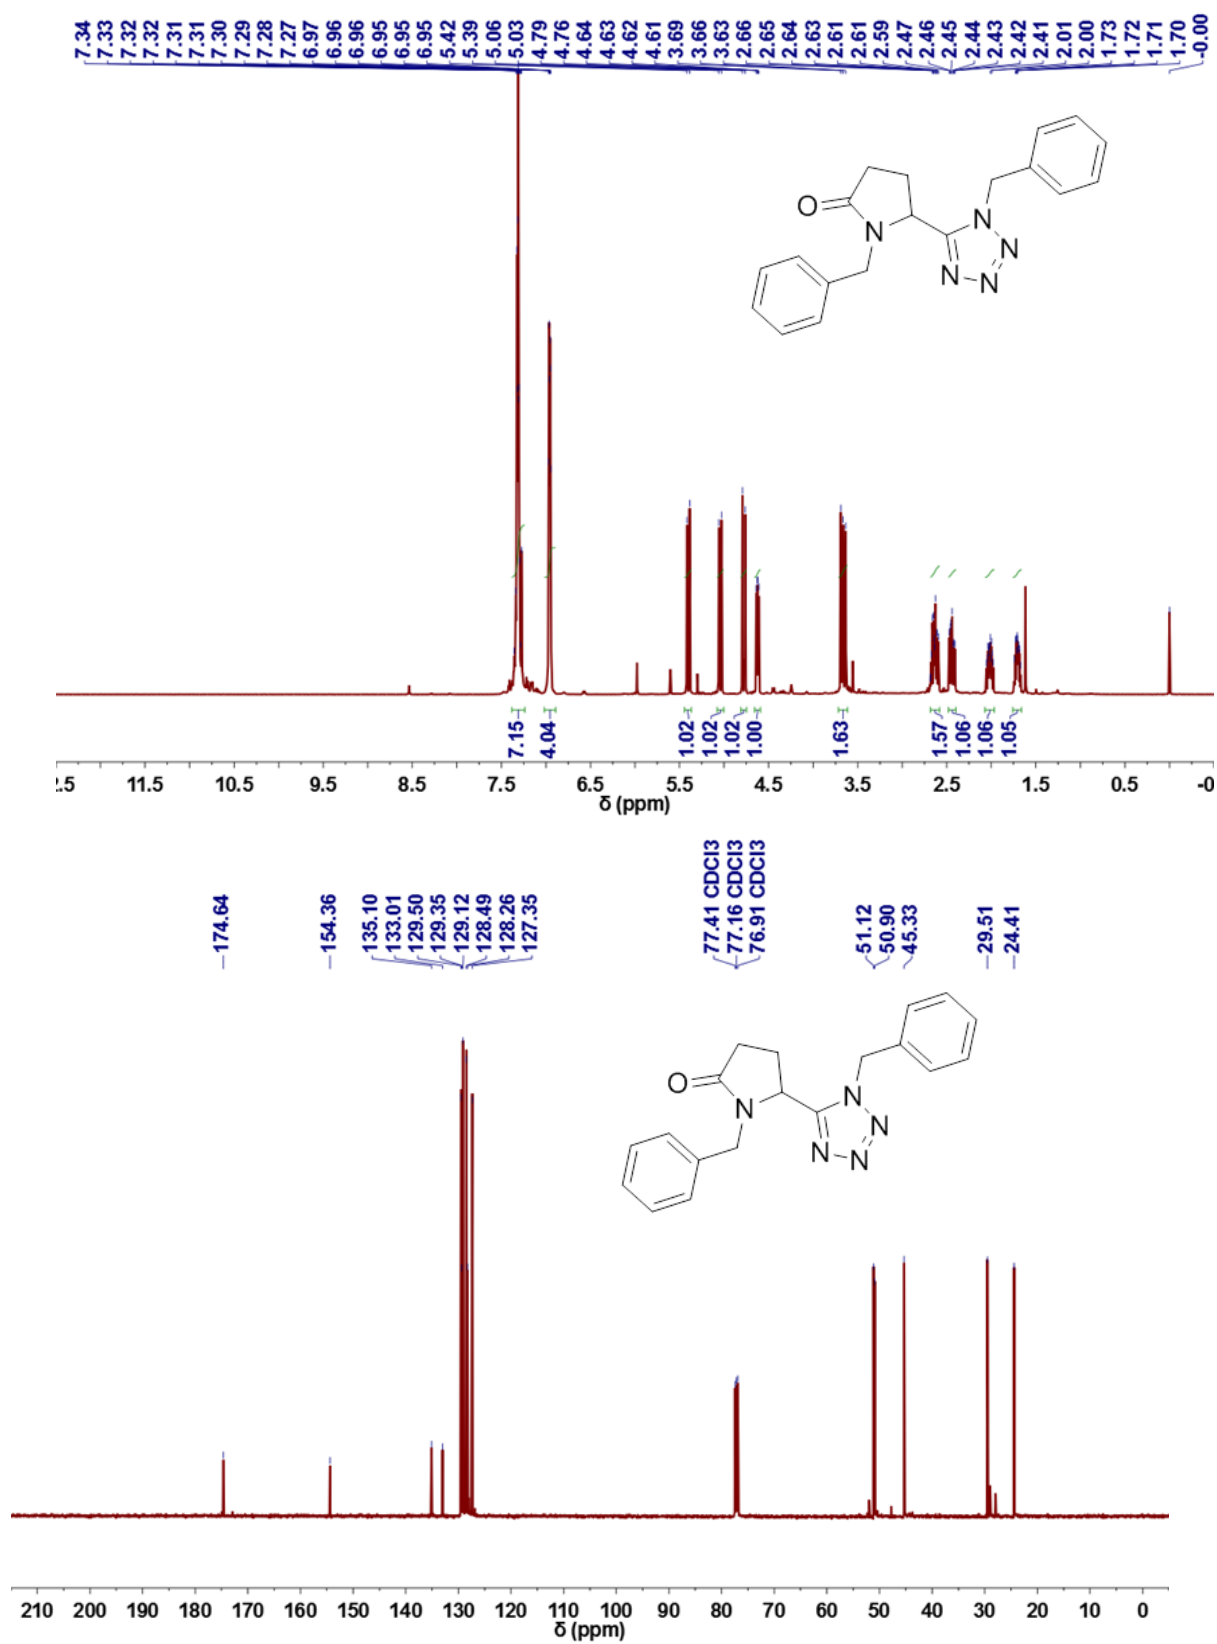

TZ653\_17\_2\_Col4\_Sol1\_5-30%\_6miN

TZ653\_17\_2

3: Diode Array  
Range: 6.75e

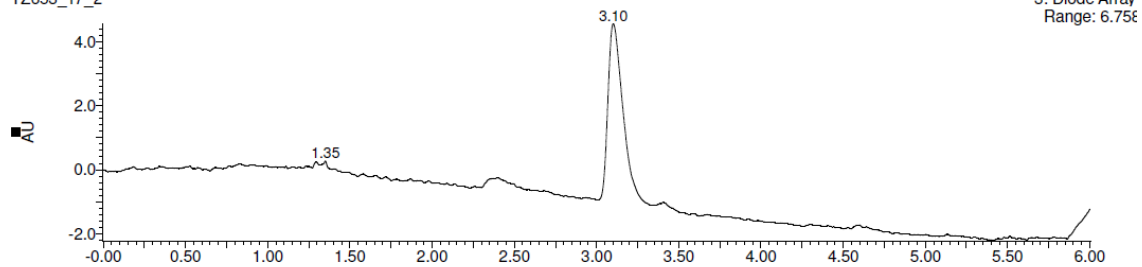

TZ653\_17\_2

1: Scan ES+  
TIC  
1.65e6

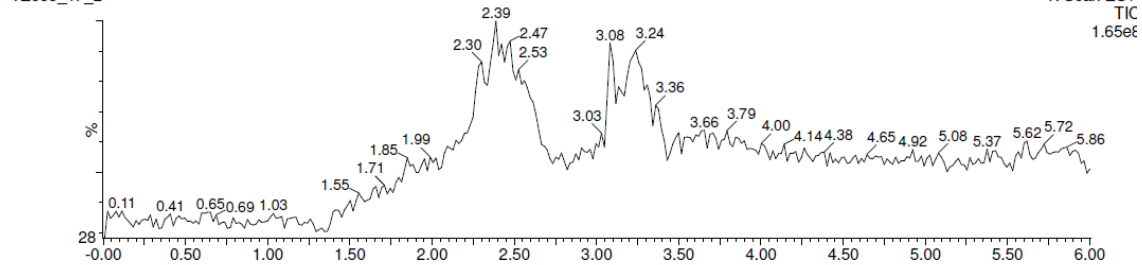

TZ653\_17\_2

1: Scan ES+  
35e  
6.61e7

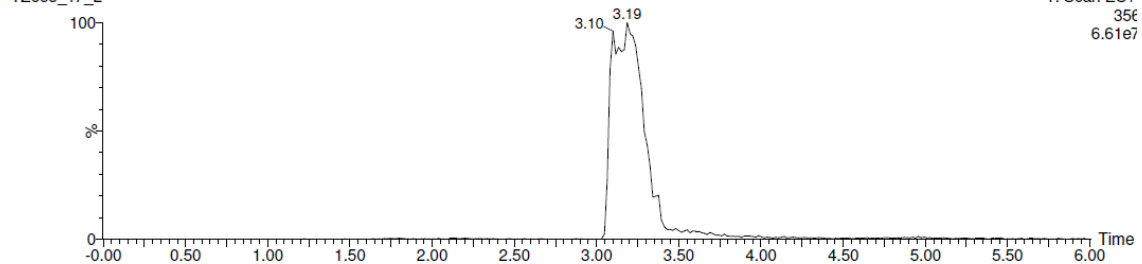

TZ653\_17\_2\_Col4\_Sol1\_5-30%\_6miN

TZ653\_17\_2\_185 (3.204)

1: Scan ES+  
6.27e7

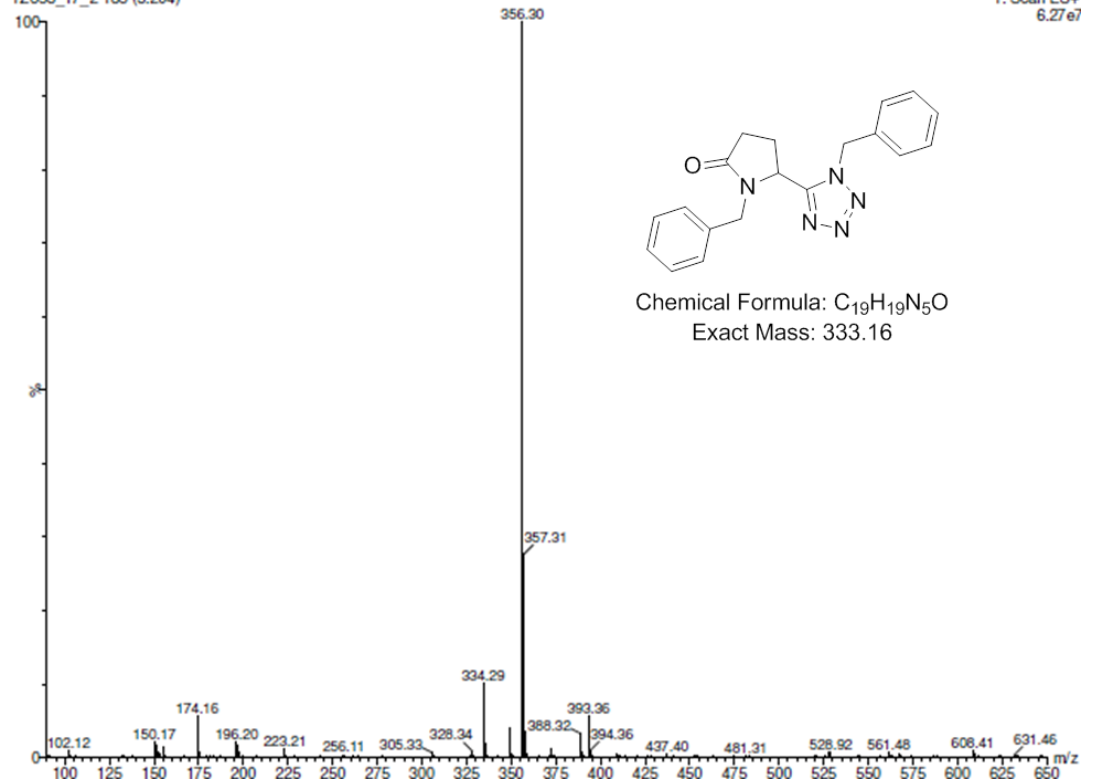

**Ethyl 3-(1-benzyl-1H-tetrazol-5-yl)-3-(benzylamino)propanoate (5n)**

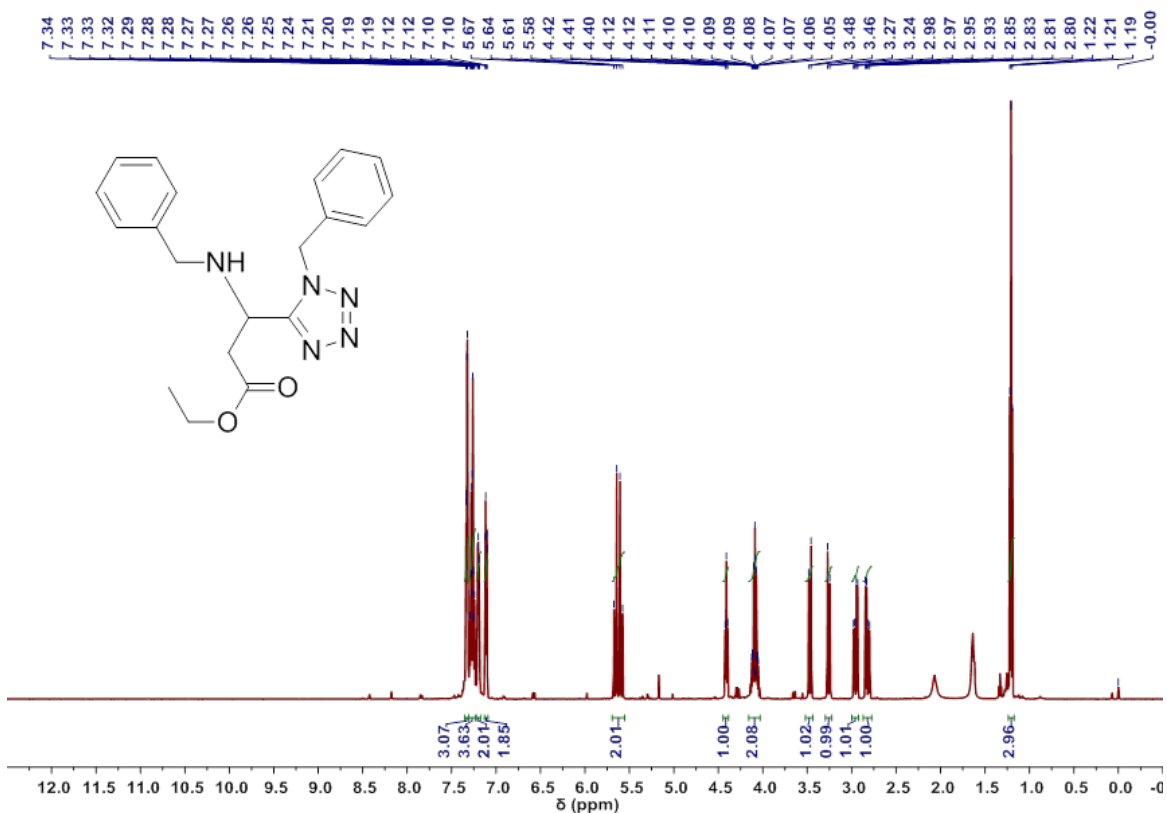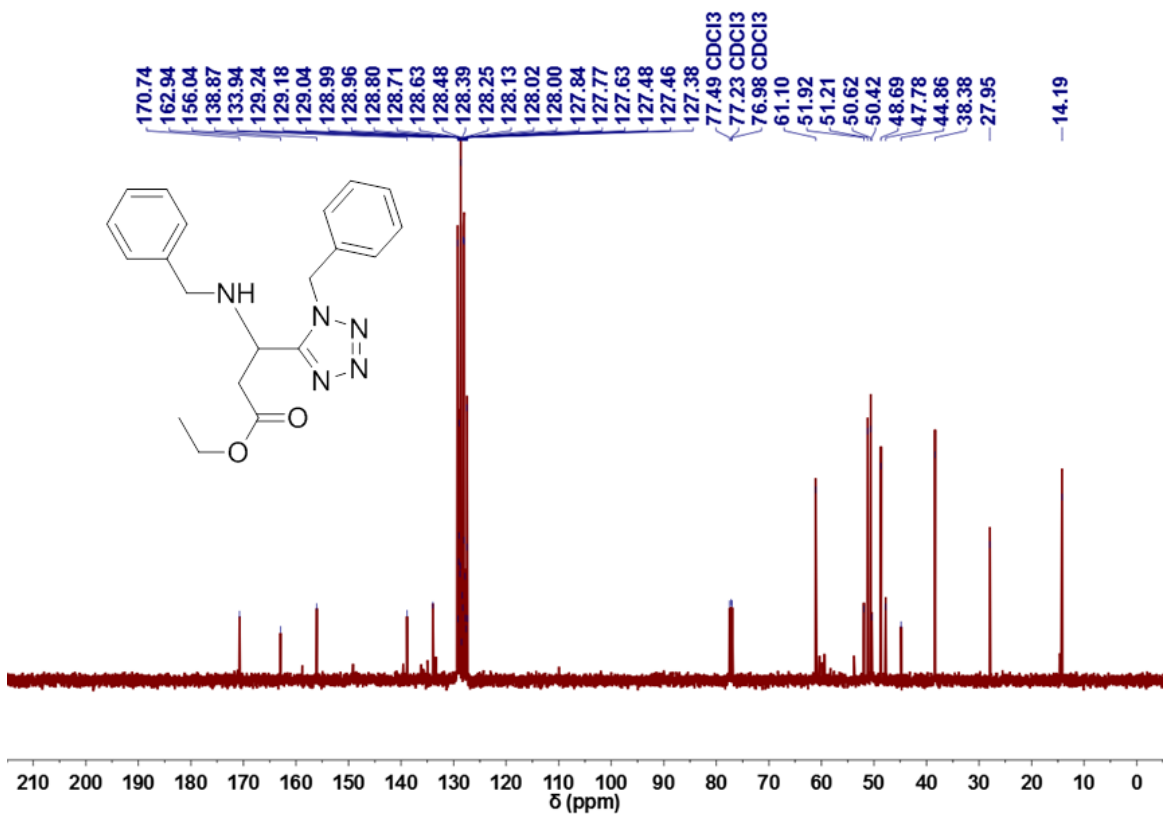

TZ559\_2\_SILICA\_4.6x250\_sol1\_5-30%\_6min  
TZ559\_2

3: Diode Array  
Range: 2.585

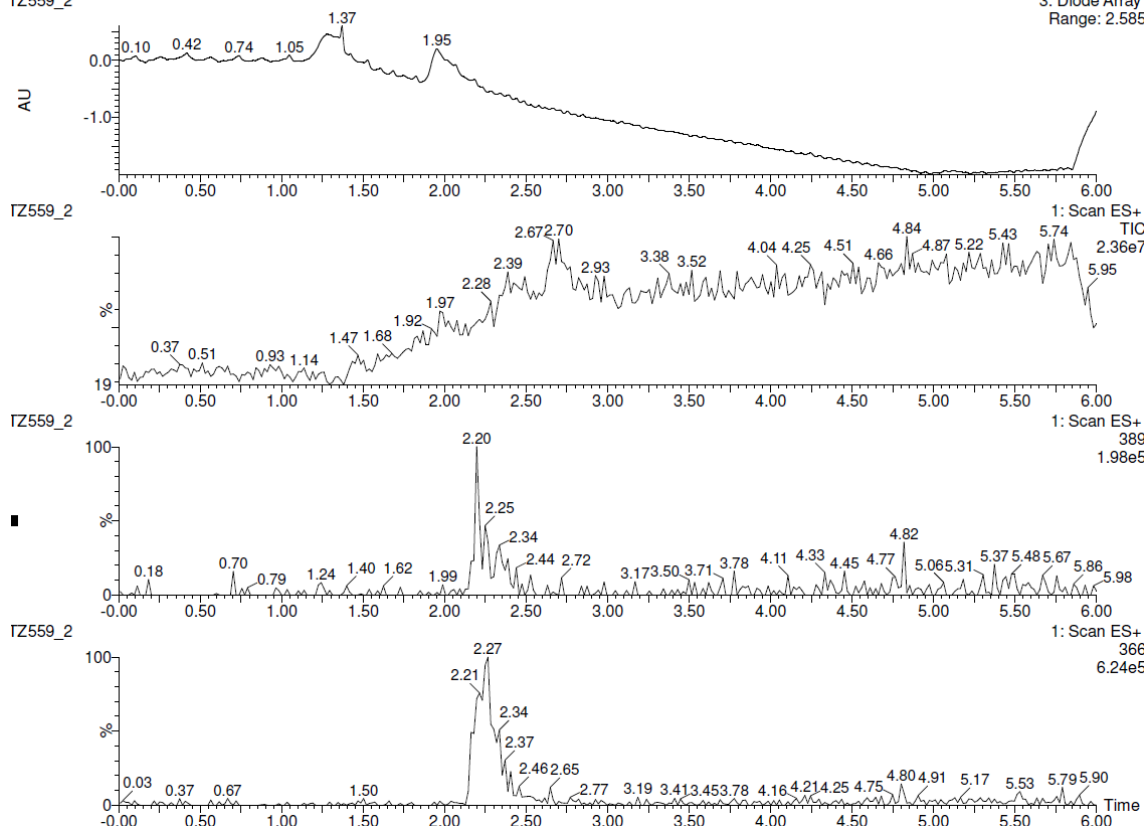

TZ559\_2\_SILICA\_4.6x250\_sol1\_5-30%\_6min  
TZ559\_2\_138 (2.388) Cm (122:145)

1: Scan ES+  
1.96e6

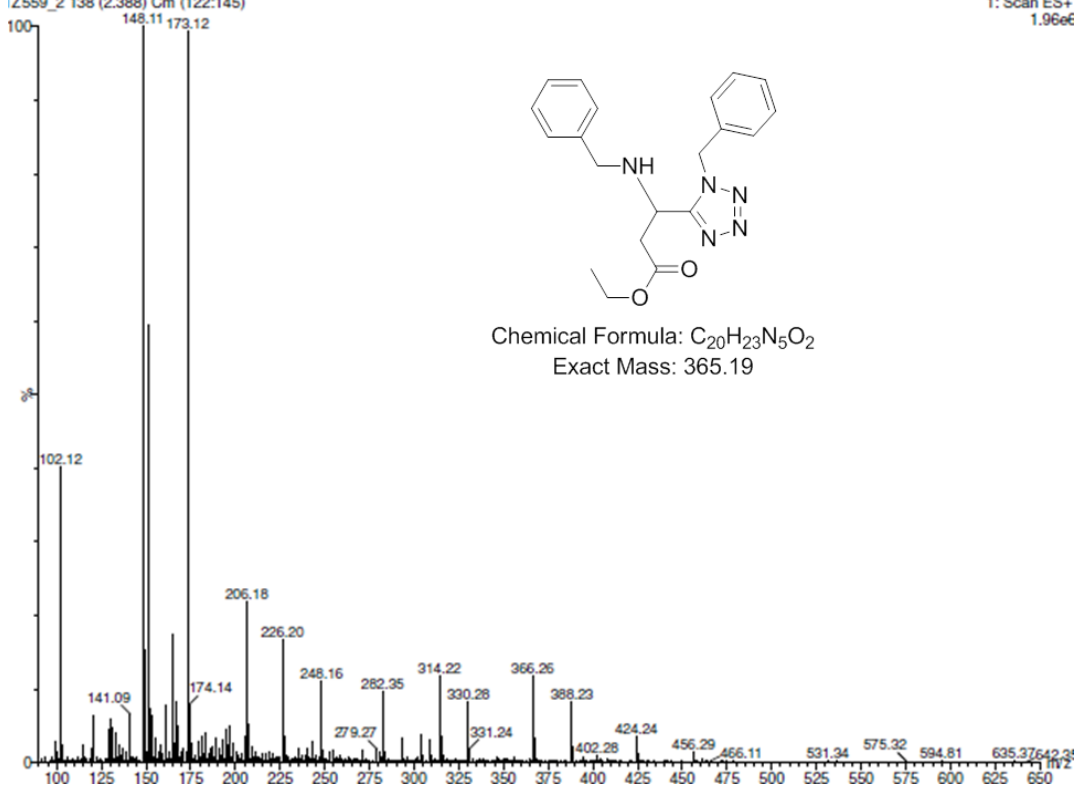

3-(1-Benzyl-1H-tetrazol-5-yl)-3-(benzylamino)propanoic acid (5n')

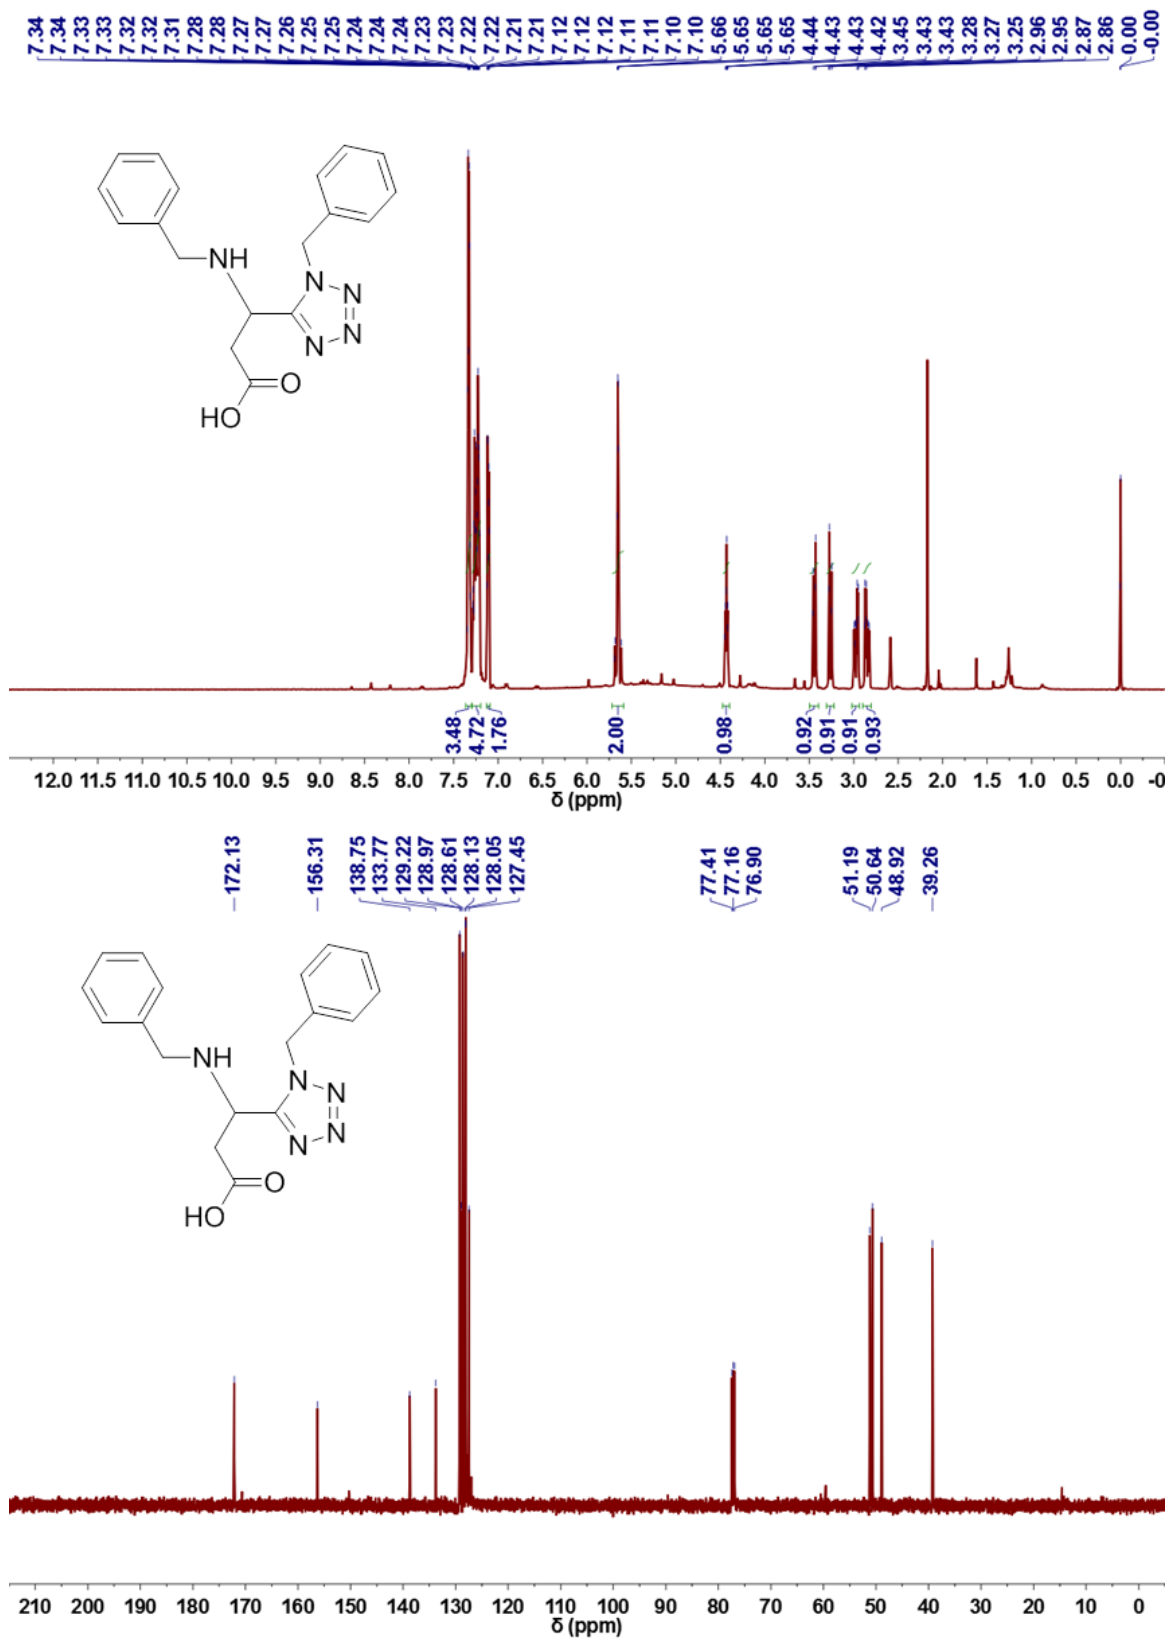



TZ602\_1\_Col4\_Sol1\_5-30%\_6min

TZ602\_1

3: Diode Array  
Range: 2.273

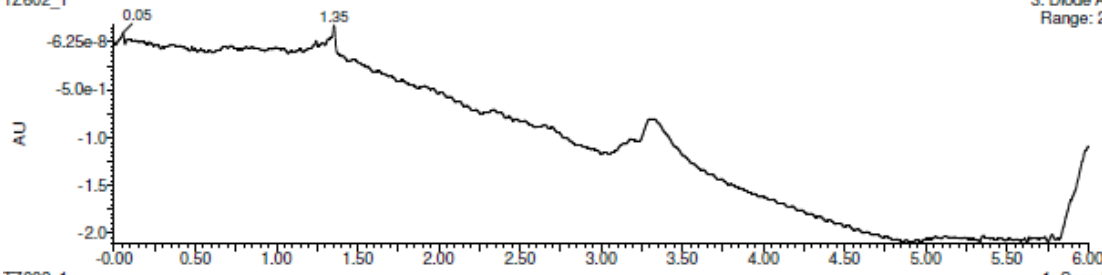

TZ602\_1

1: Scan ES+  
TIC  
2.34e6

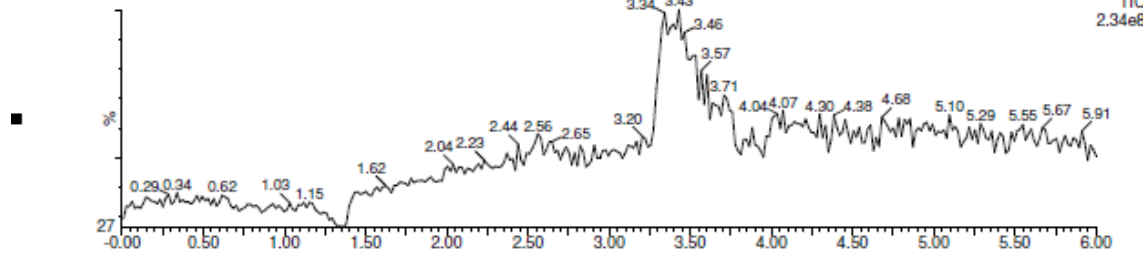

TZ602\_1

1: Scan ES+  
338  
2.79e6

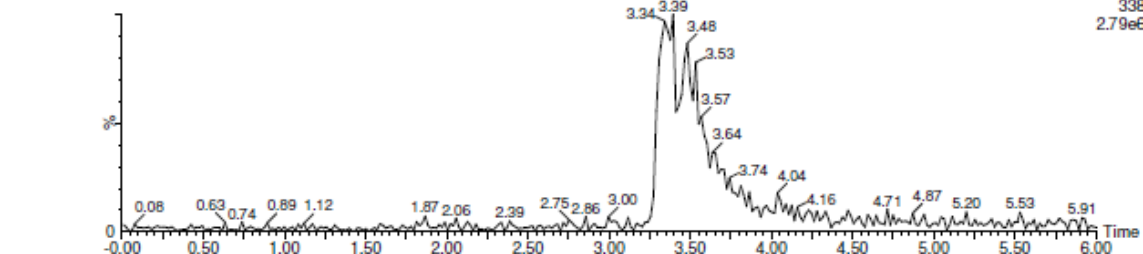

TZ602\_1\_Col4\_Sol1\_5-30%\_6min

TZ602\_1\_195 (3.378)

1: Scan ES+  
7.63e7

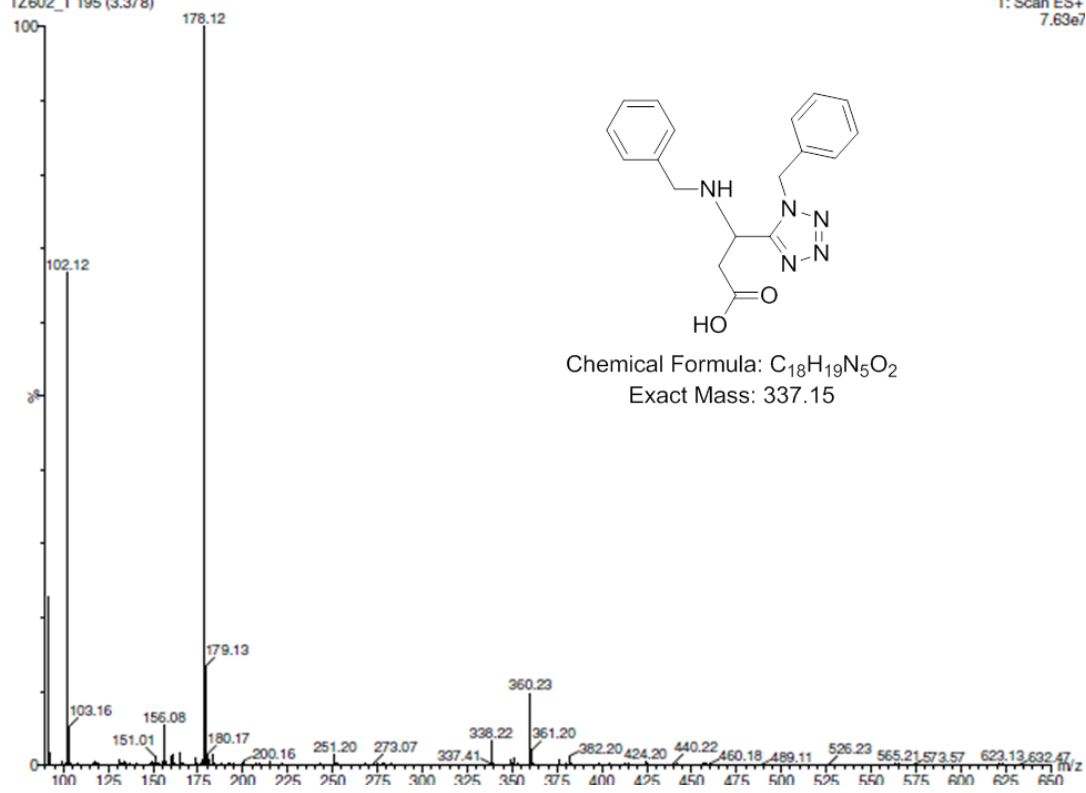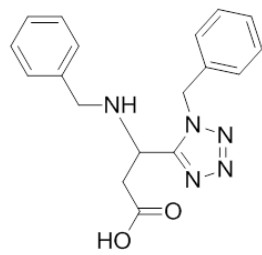

Chemical Formula: C<sub>18</sub>H<sub>19</sub>N<sub>5</sub>O<sub>2</sub>  
Exact Mass: 337.15

3-(1-Benzyl-1H-tetrazol-5-yl)-3-(benzylamino)propanamide (50')

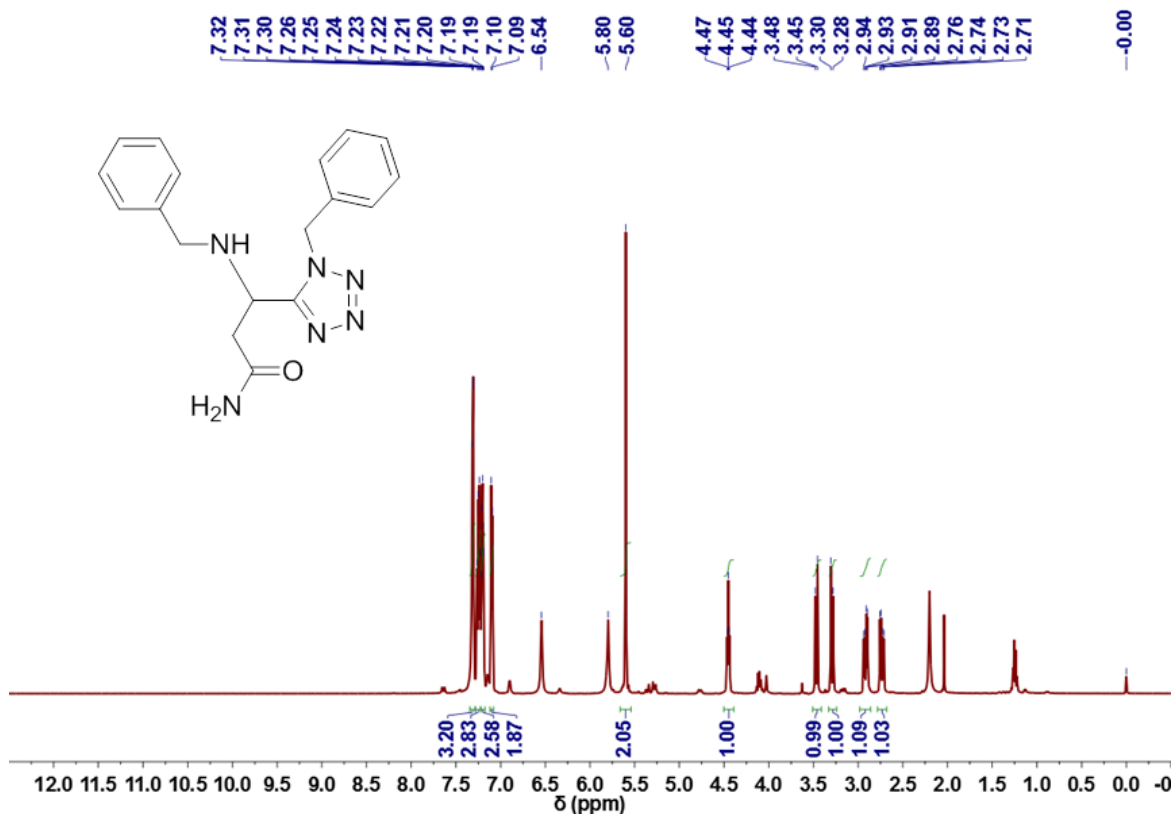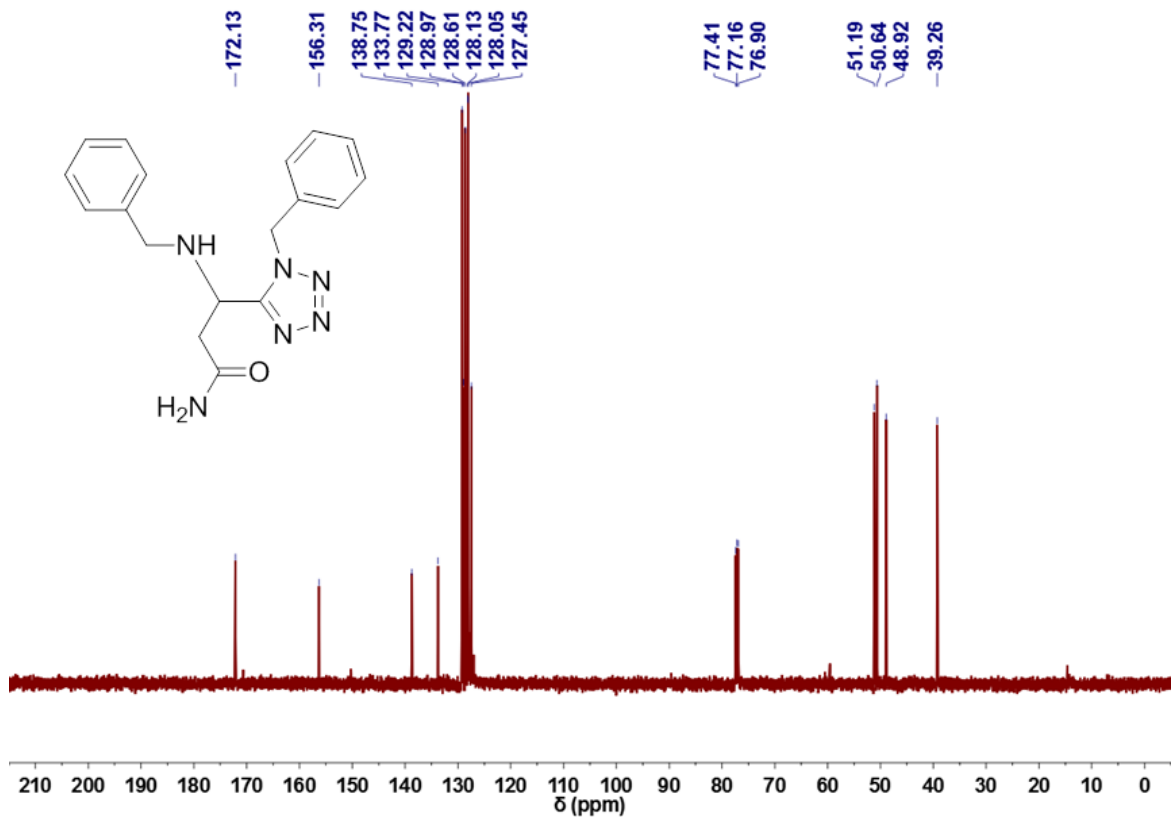

TZ777\_4\_Col4\_sol1\_5-30%\_6min  
TZ777\_4

3: Diode Array  
Range: 5.083

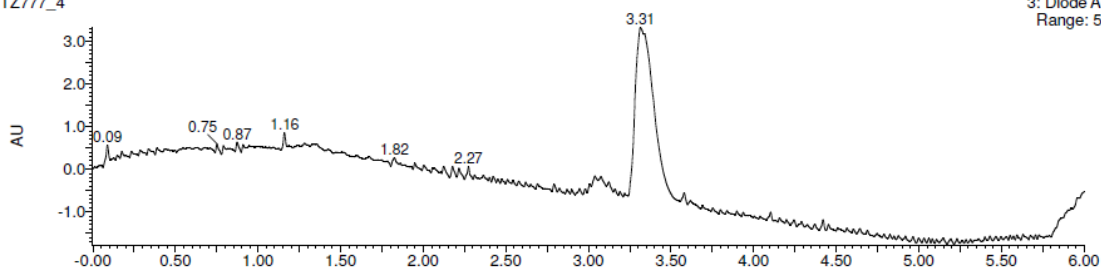

TZ777\_4

1: Scan ES+  
TIC  
2.86e7

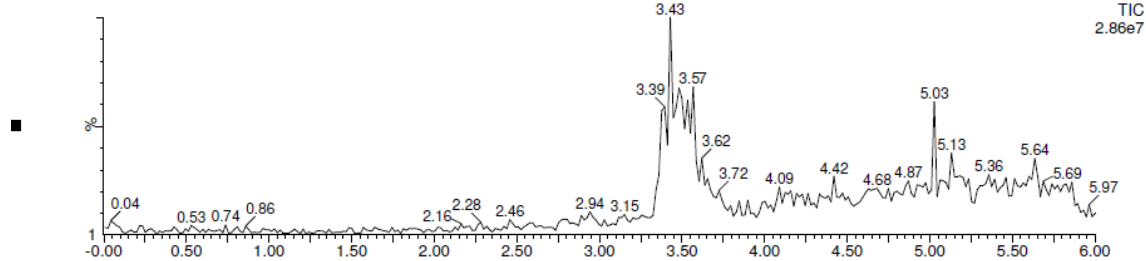

TZ777\_4

1: Scan ES+  
359  
5.34e6

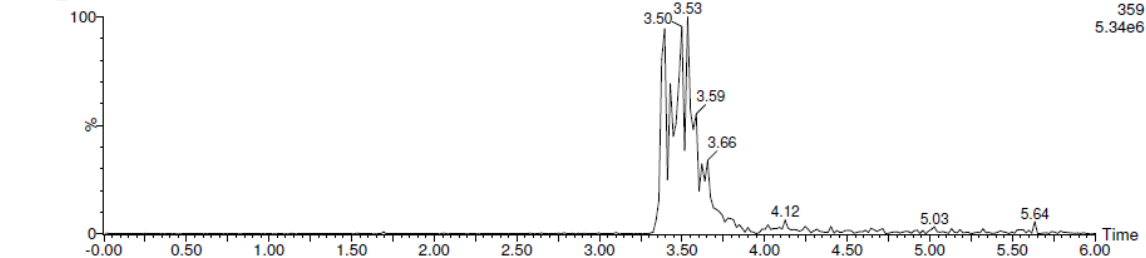

TZ777\_F22\_1\_Col4\_Sol1\_5-30%\_6min  
TZ777\_F22\_1 210 (3.638)

1: Scan ES+  
1.13e7

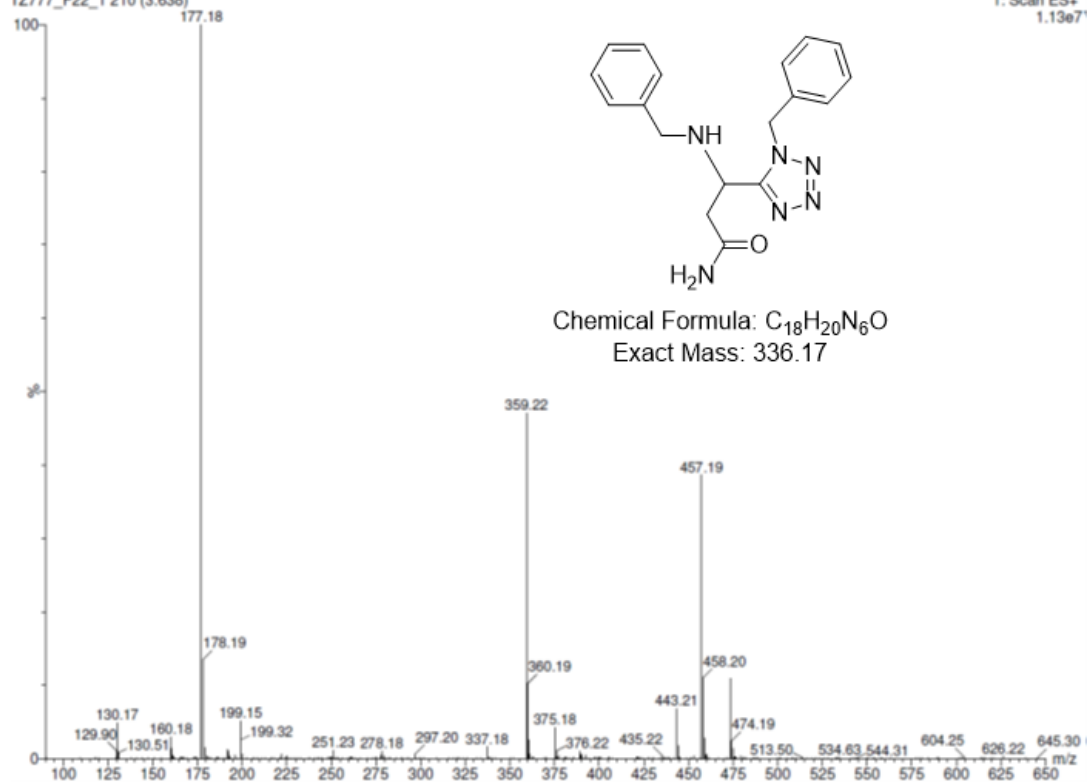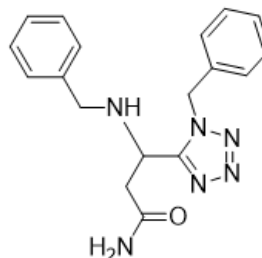

Chemical Formula: C<sub>18</sub>H<sub>20</sub>N<sub>6</sub>O  
Exact Mass: 336.17

2-(1-Benzyl-1H-tetrazol-5-yl)-2-(benzylamino)ethan-1-ol (5p)

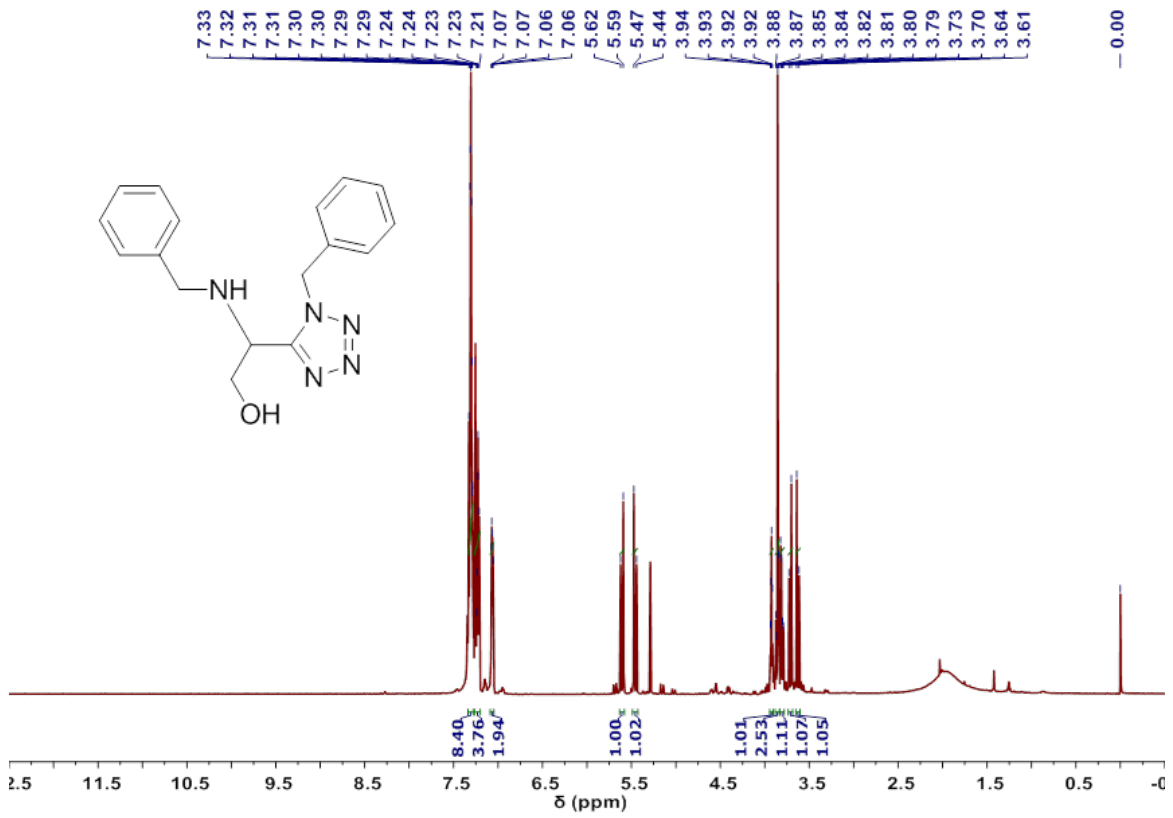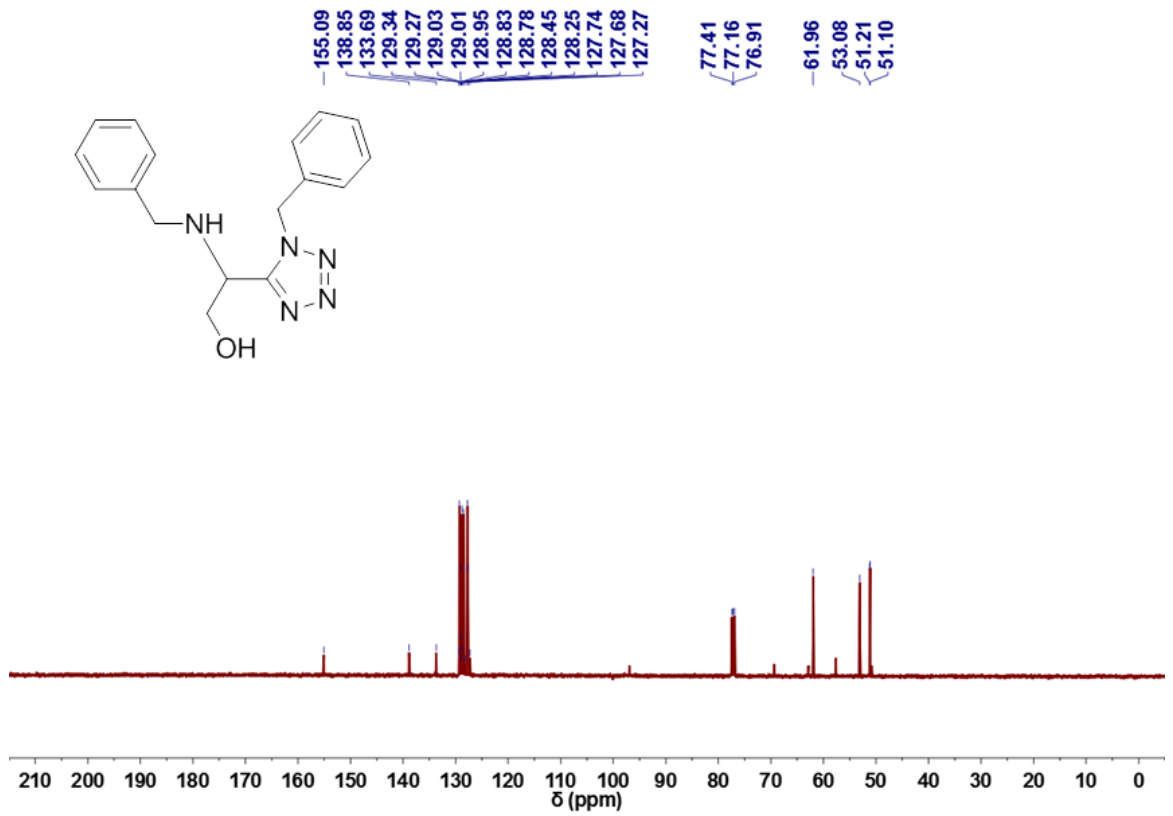

TZ495\_2\_Col4\_sol1\_5-30%\_6min

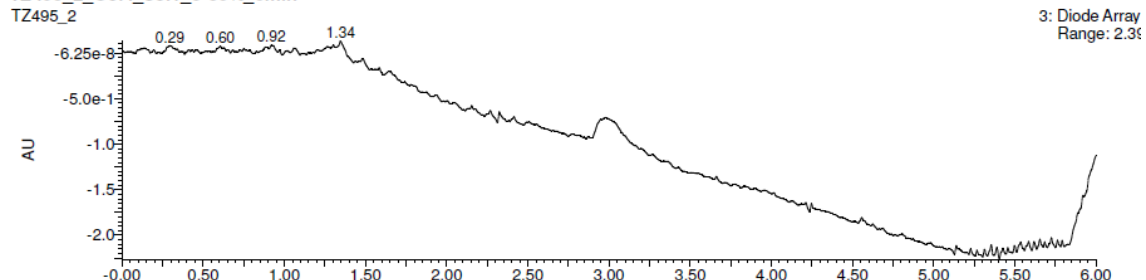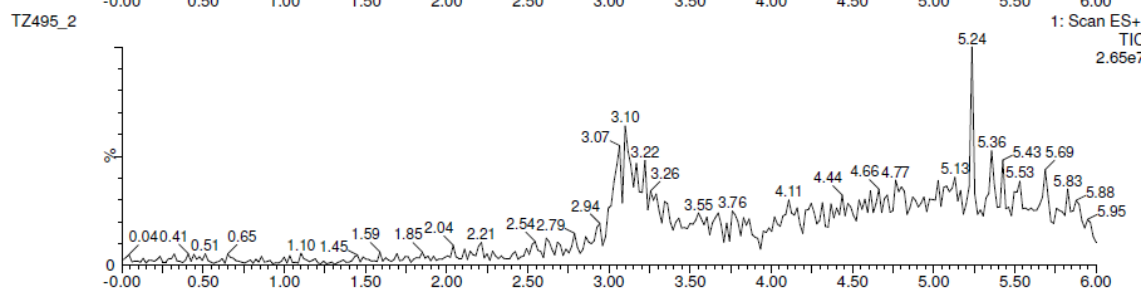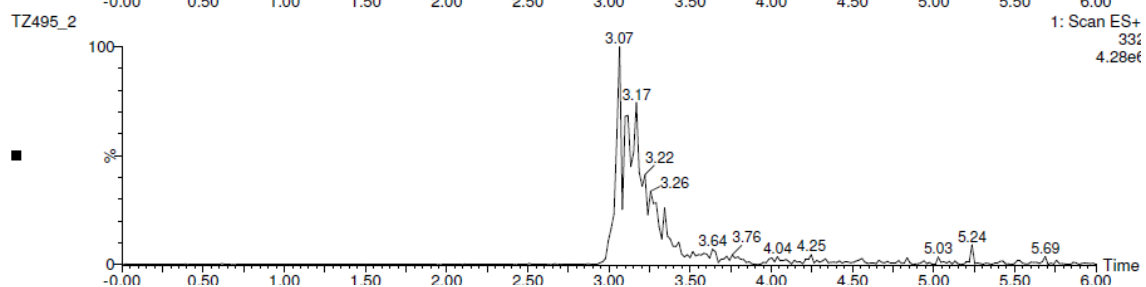

TZ495\_F23\_1\_Col4\_Sol1\_5-30%\_6min

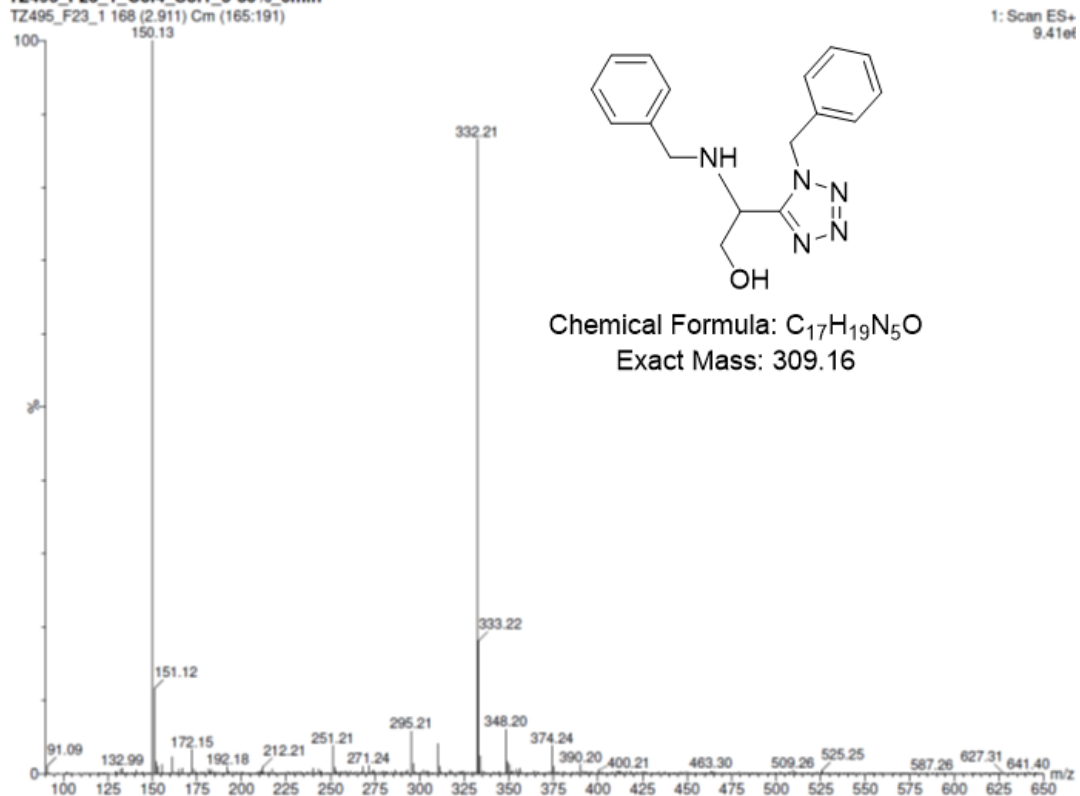

4-(2-(1-Benzyl-1H-tetrazol-5-yl)-2-(benzylamino)ethyl)phenol (5q)

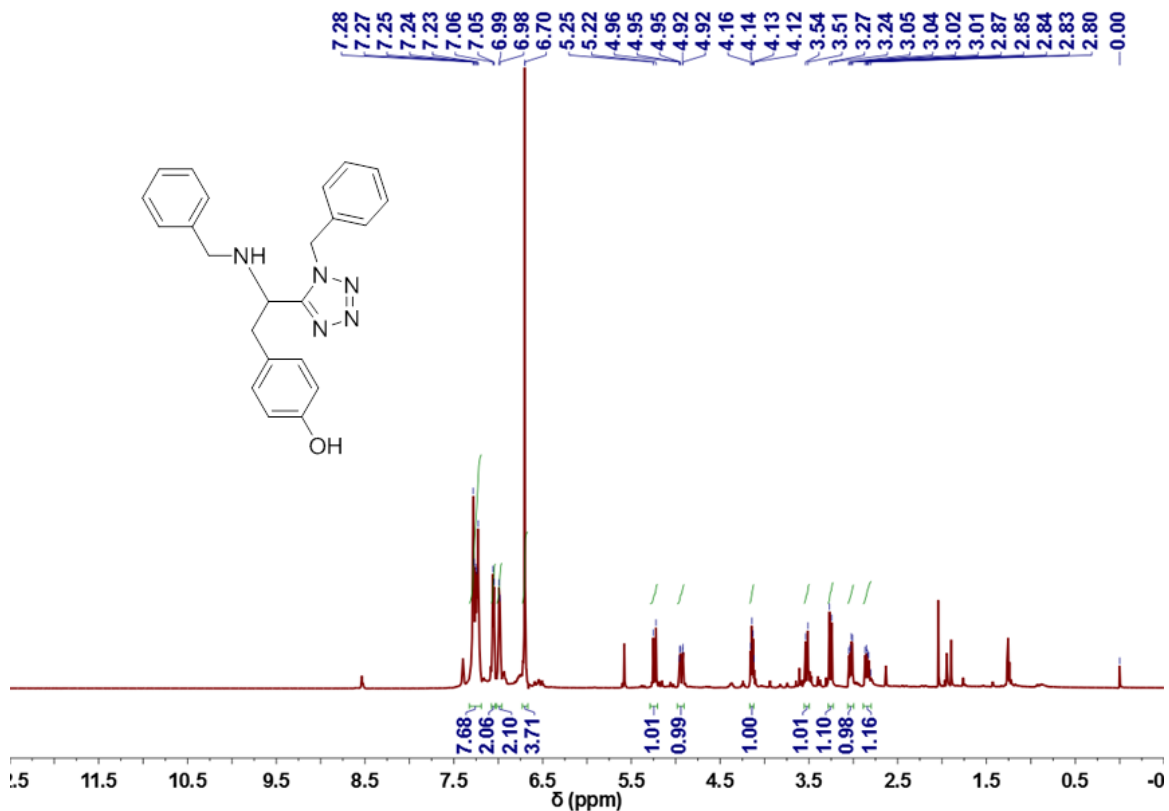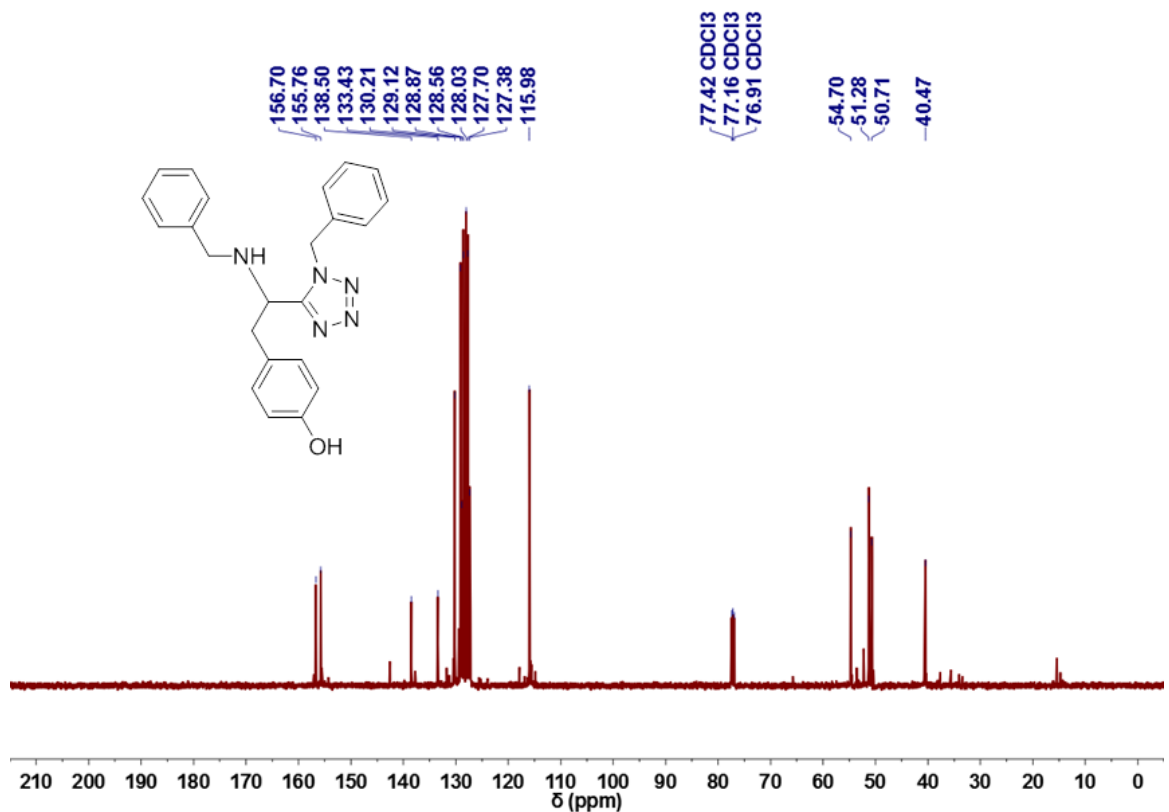

TZ551\_3\_Col4\_sol1\_5-30%\_6min  
TZ551\_3

3: Diode Array  
Range: 4.563e+1

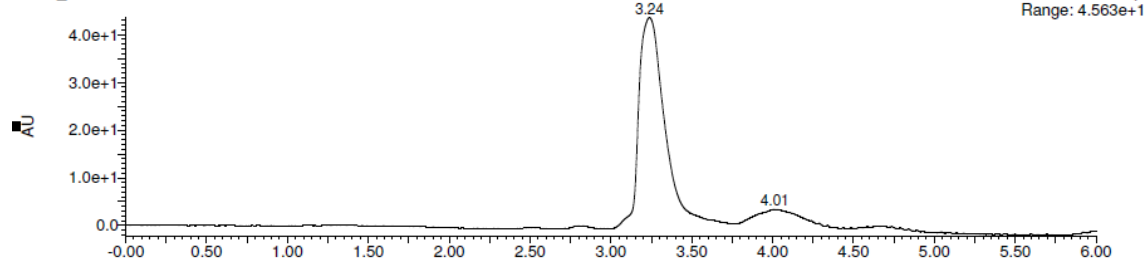

TZ551\_3  
1: Scan ES+  
TIC  
9.01e7

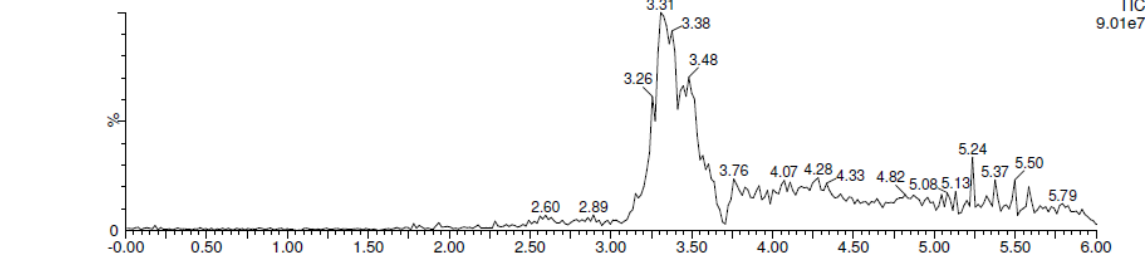

TZ551\_3  
1: Scan ES+  
468  
9.40e6

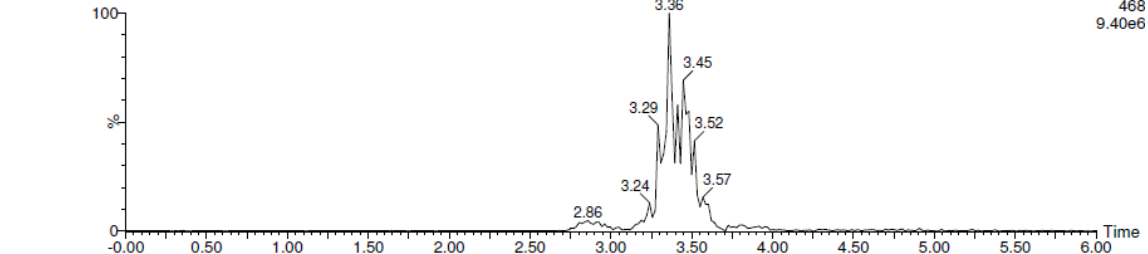

TZ551\_1\_sillica\_4.6x250\_sol1\_5-30%\_6min  
TZ551\_1 184 (3.187) Cm (180:201)

1: Scan ES+  
1.61e6

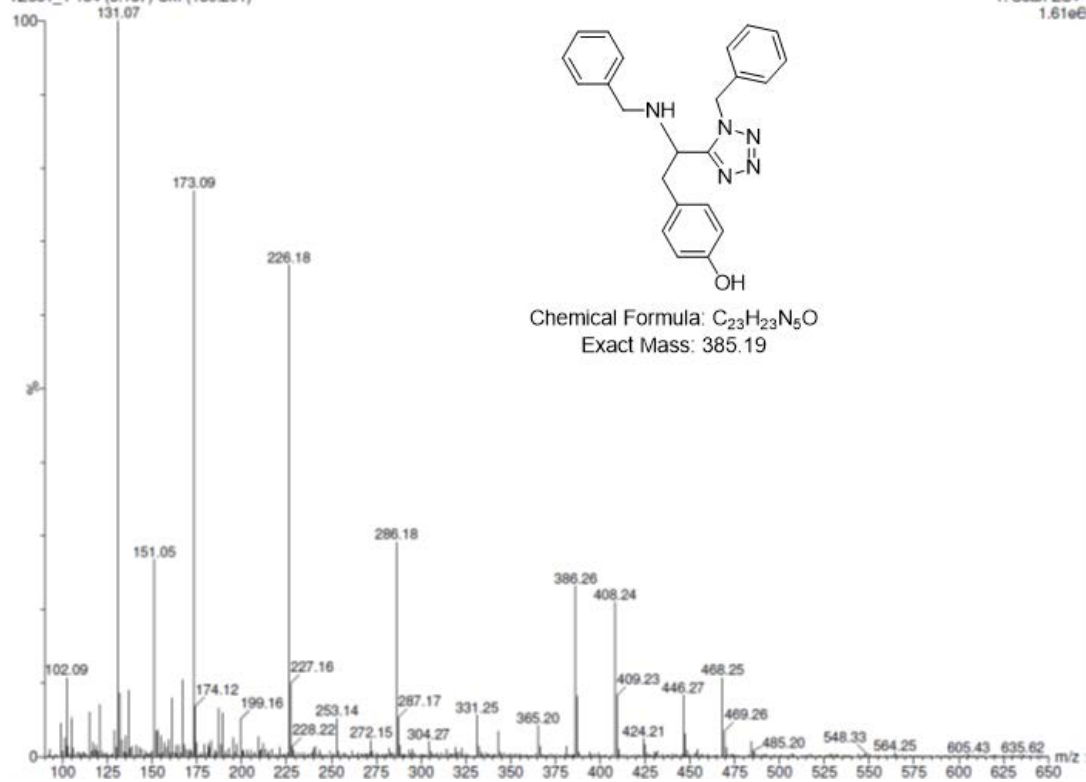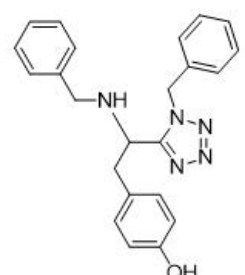

Chemical Formula: C<sub>23</sub>H<sub>23</sub>N<sub>5</sub>O  
Exact Mass: 385.19

**1-(1-Benzyl-1H-tetrazol-5-yl)-1-(benzylamino)propan-2-ol (5r)**

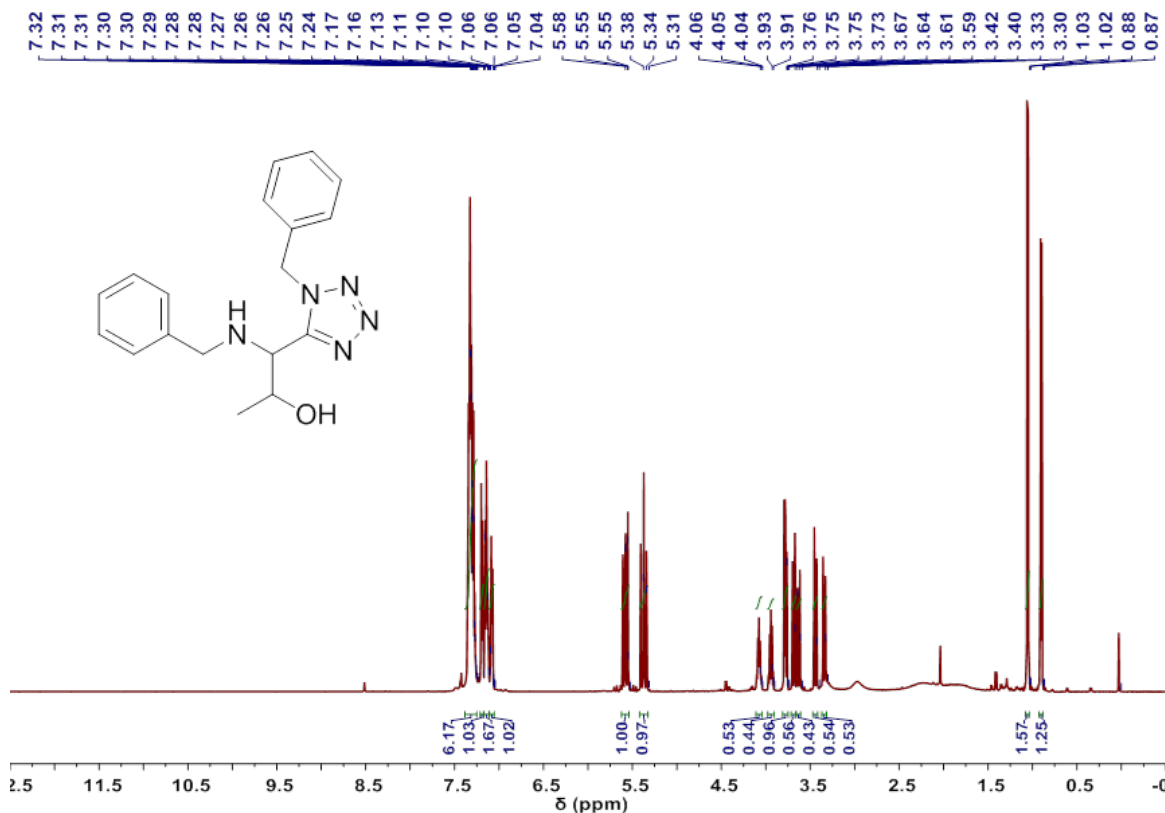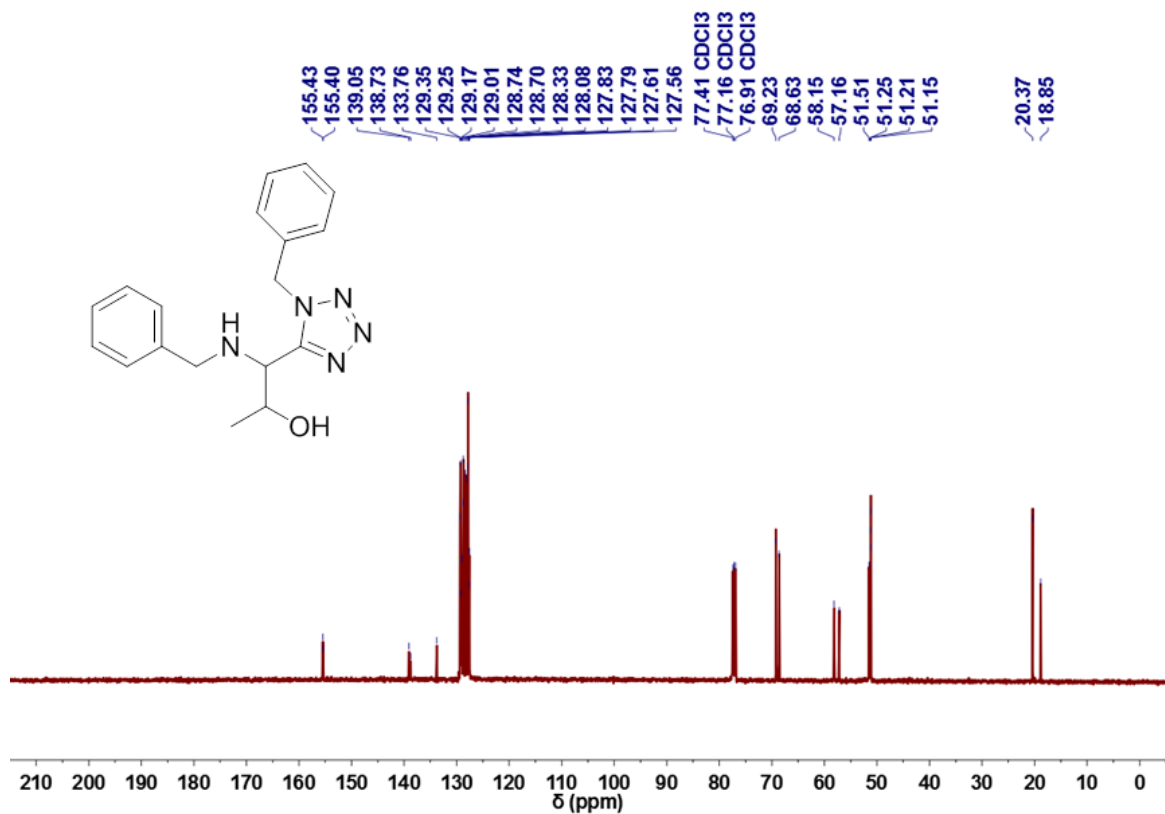



TZ567\_1\_Col4\_Sol1\_5-30%\_6min  
TZ567\_2

3: Diode Array  
Range: 2.865

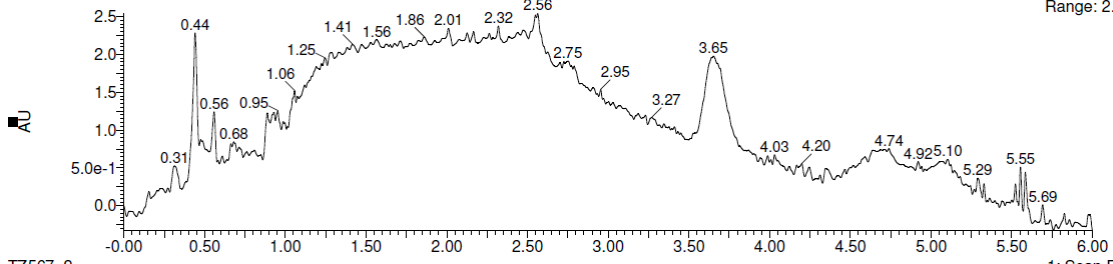

TZ567\_2  
1: Scan ES+  
TIC  
1.43e8

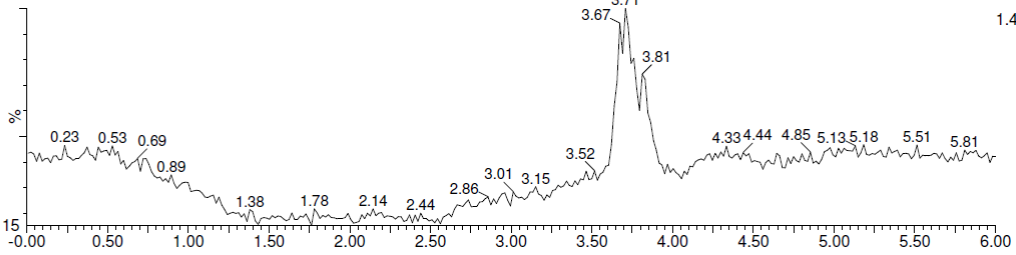

TZ567\_2  
1: Scan ES+  
346  
2.92e7

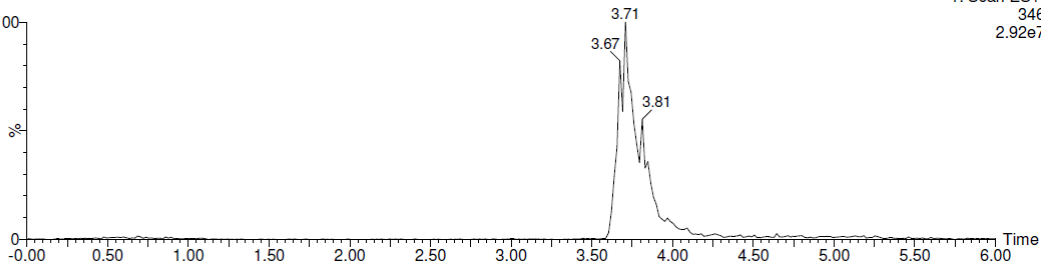

TZ567\_1\_Col4\_Sol1\_5-30%\_6min  
TZ567\_2\_216 (3.742)

1: Scan ES+  
3.95e7

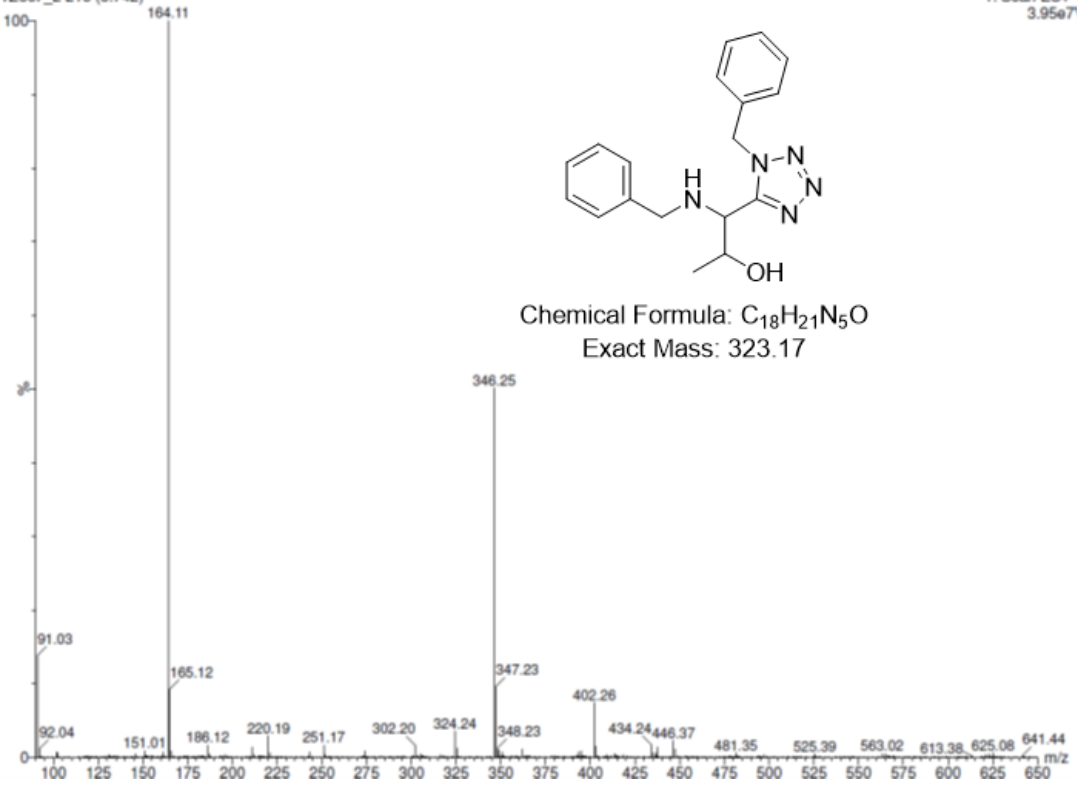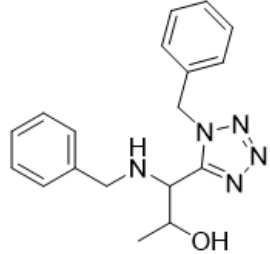

Chemical Formula: C<sub>18</sub>H<sub>21</sub>N<sub>5</sub>O  
Exact Mass: 323.17

***N*-Benzyl-1-(1-benzyl-1H-tetrazol-5-yl)-2-(1H-indol-3-yl)ethanamine (5s)**

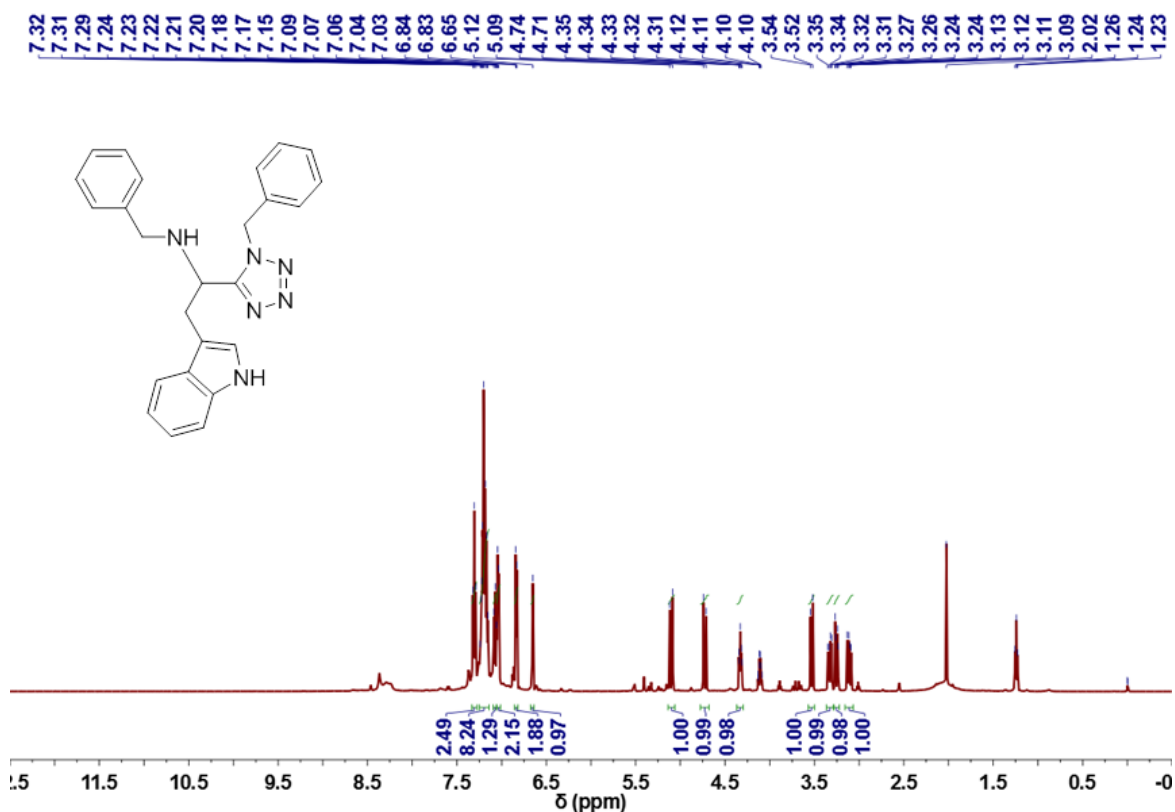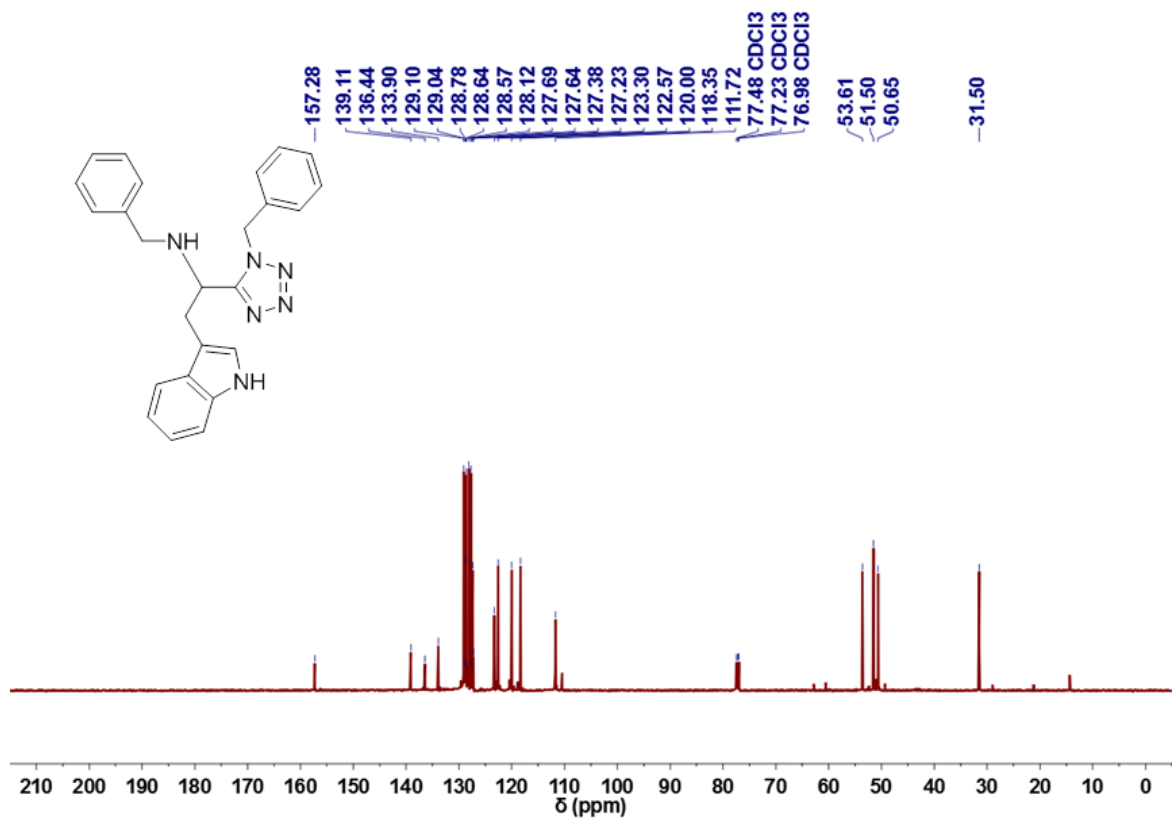

TZ571\_1\_silica\_4.6x250\_sol1\_5-30%\_6min

TZ571\_1

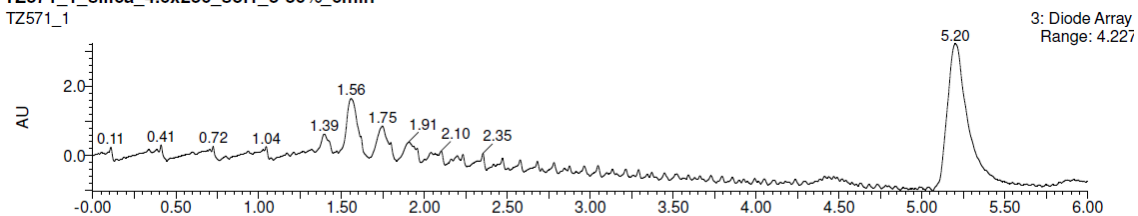

TZ571\_1

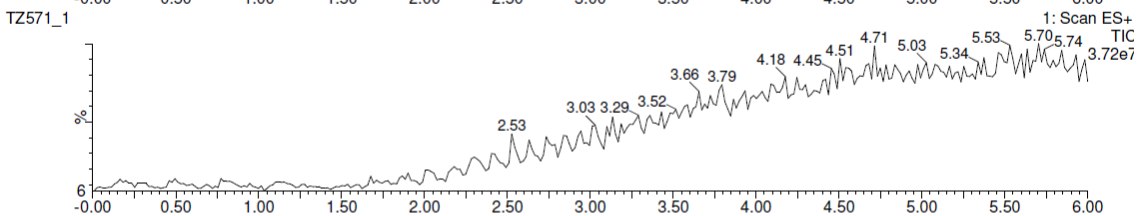

TZ571\_1

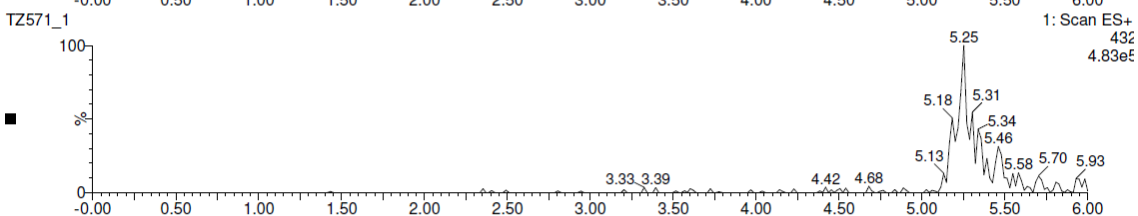

TZ571\_1

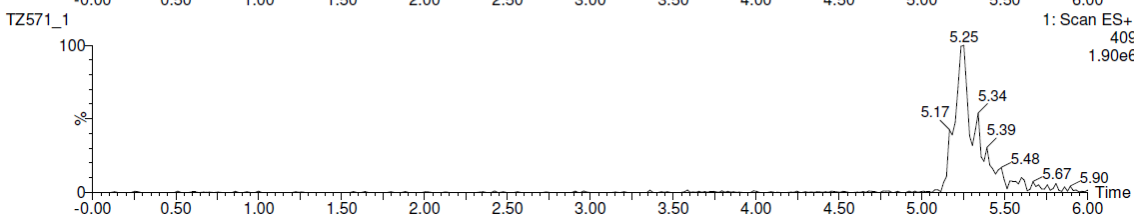

TZ571\_1\_silica\_4.6x250\_sol1\_5-30%\_6min

TZ571\_1 319 (5.531) Cm (296.321)

100

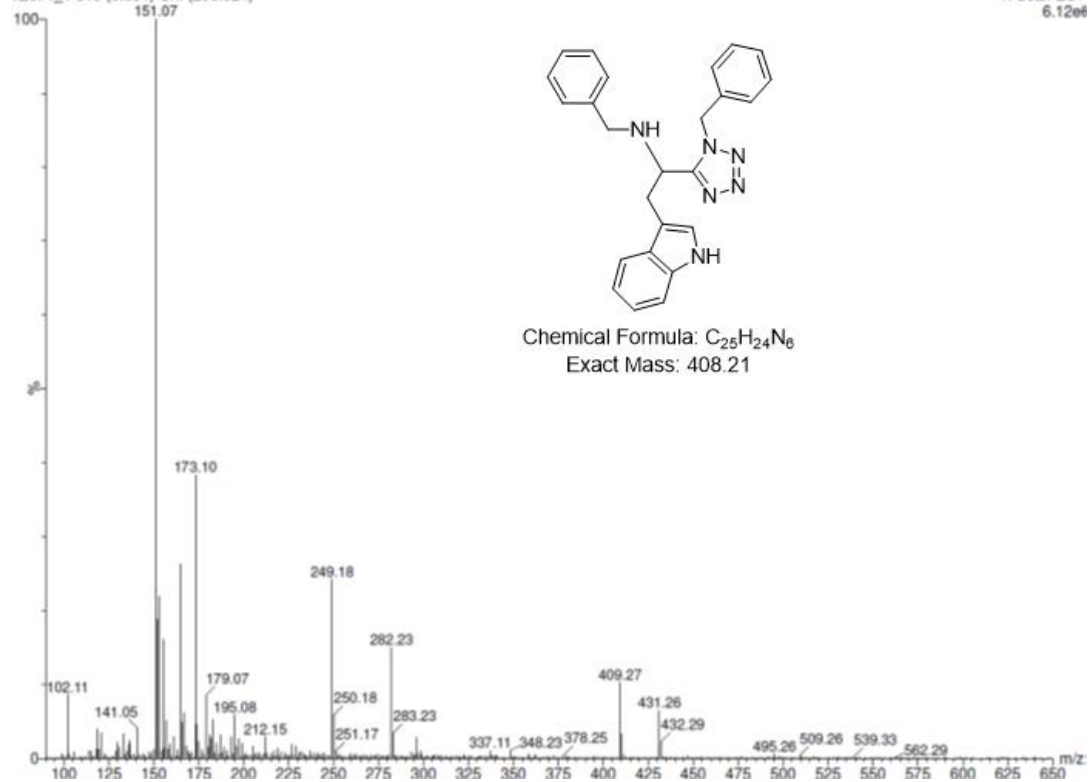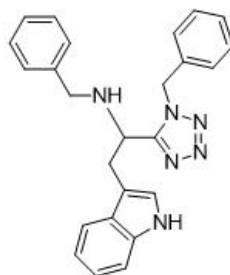

Chemical Formula: C<sub>25</sub>H<sub>24</sub>N<sub>6</sub>  
Exact Mass: 408.21

***N*-Benzyl-1-(1-benzyl-1H-tetrazol-5-yl)-2-(1-trityl-1H-imidazol-4-yl)ethanamine (5t)**

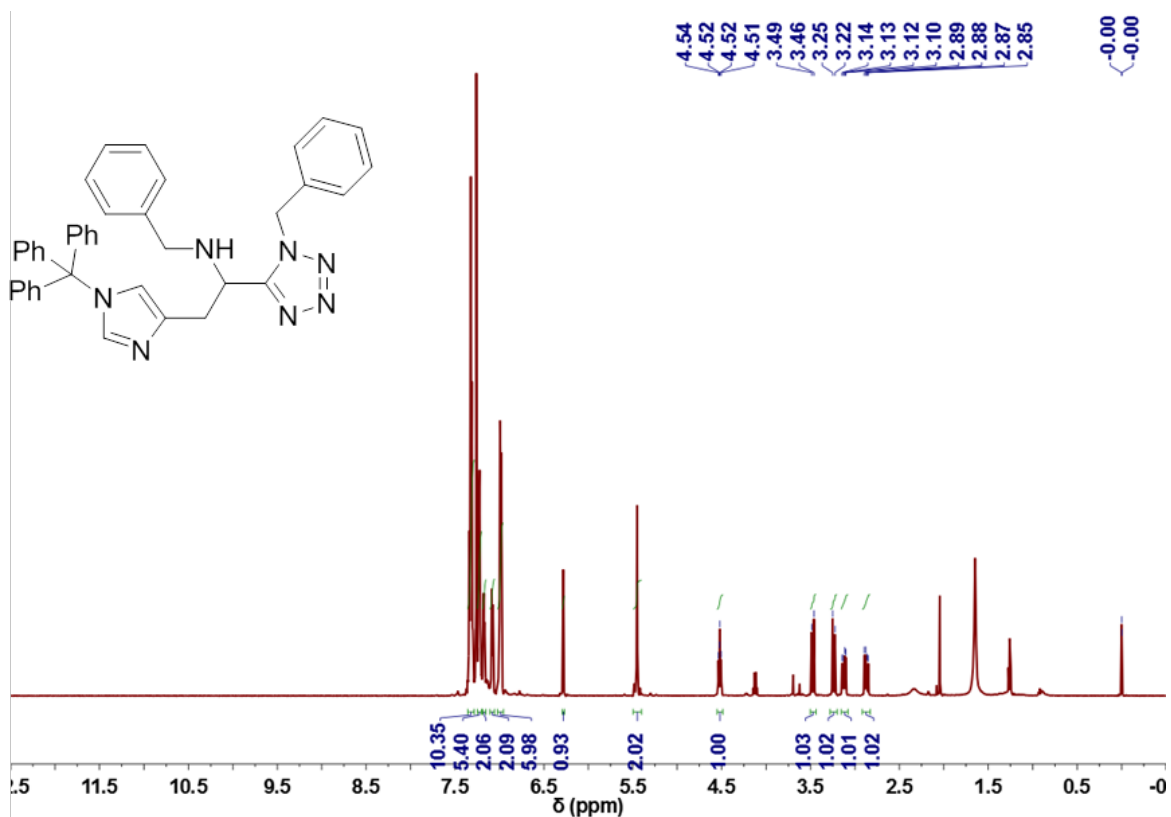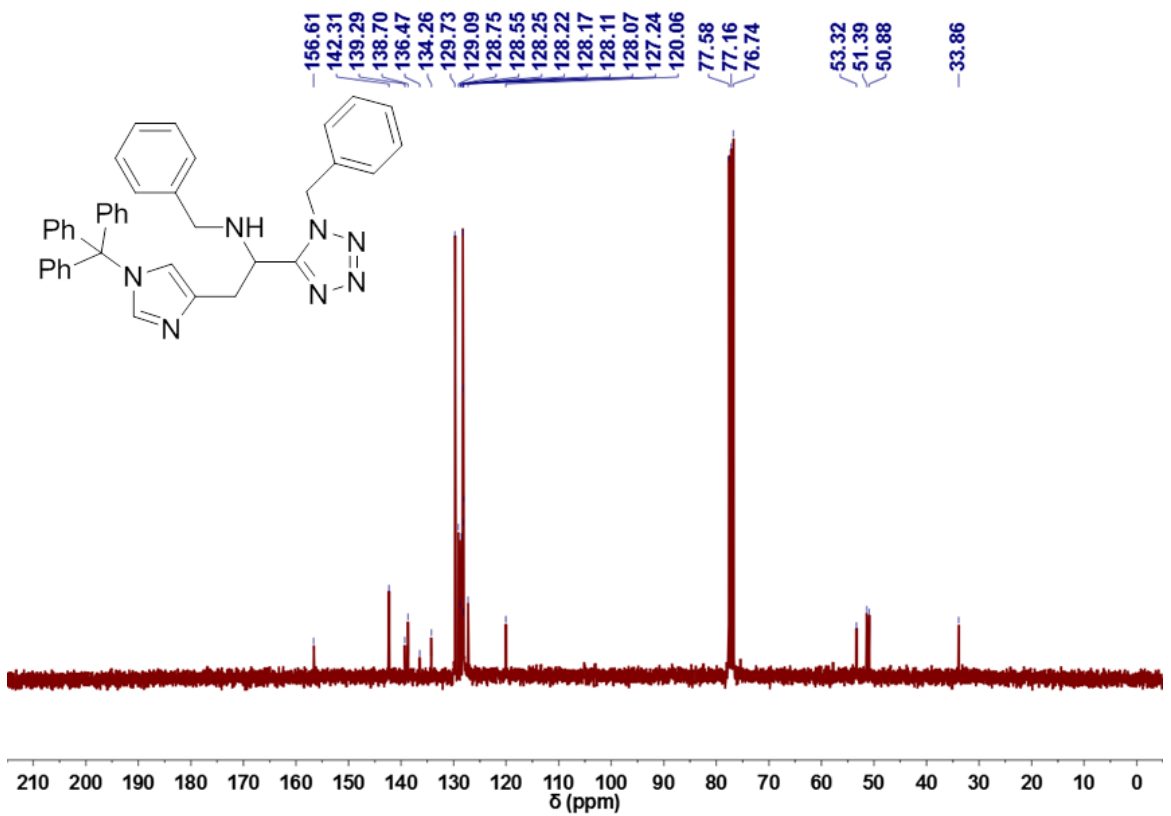

TZ842\_6\_Col4\_sol1\_5-30%\_6min  
TZ842\_6

3: Diode Array  
Range: 2.33f

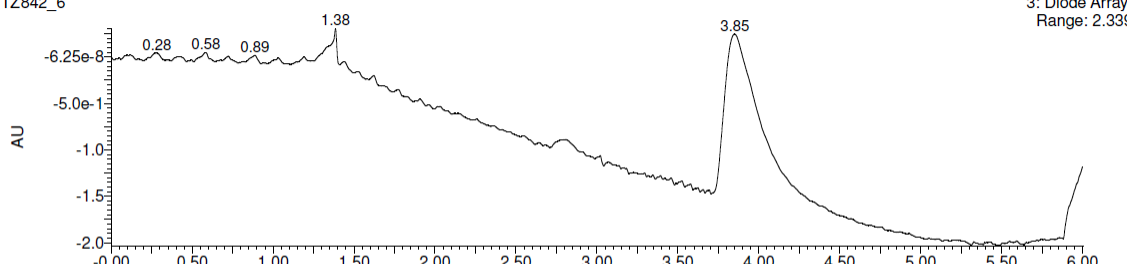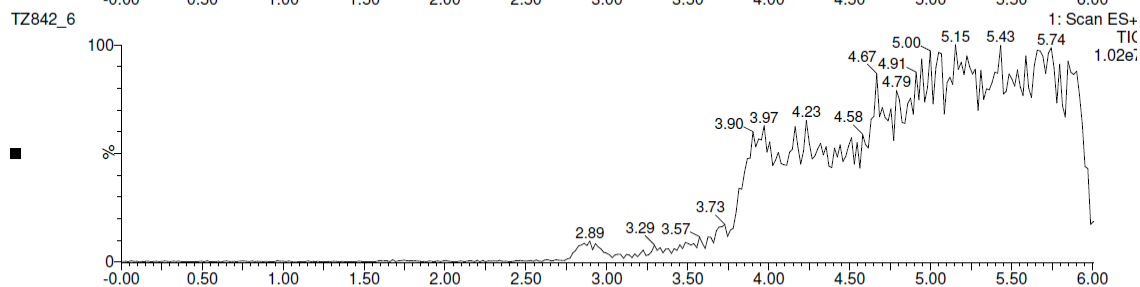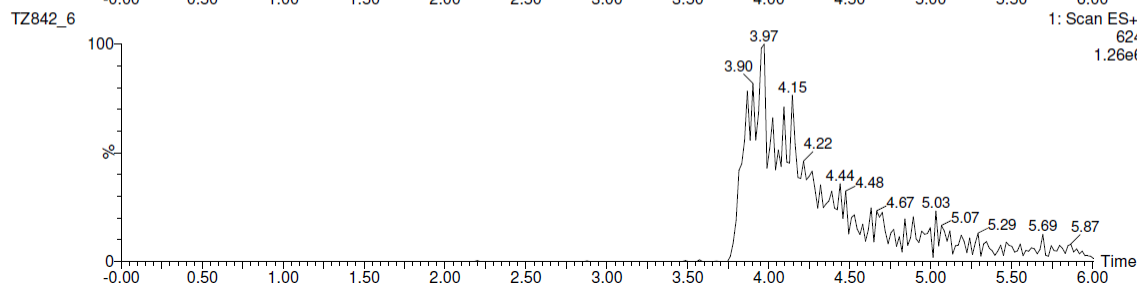

TZ842\_6\_Col4\_sol1\_5-30%\_6min  
TZ842\_6 269 (4.667) Cm (217:281)

1: Scan ES+  
4.81e!

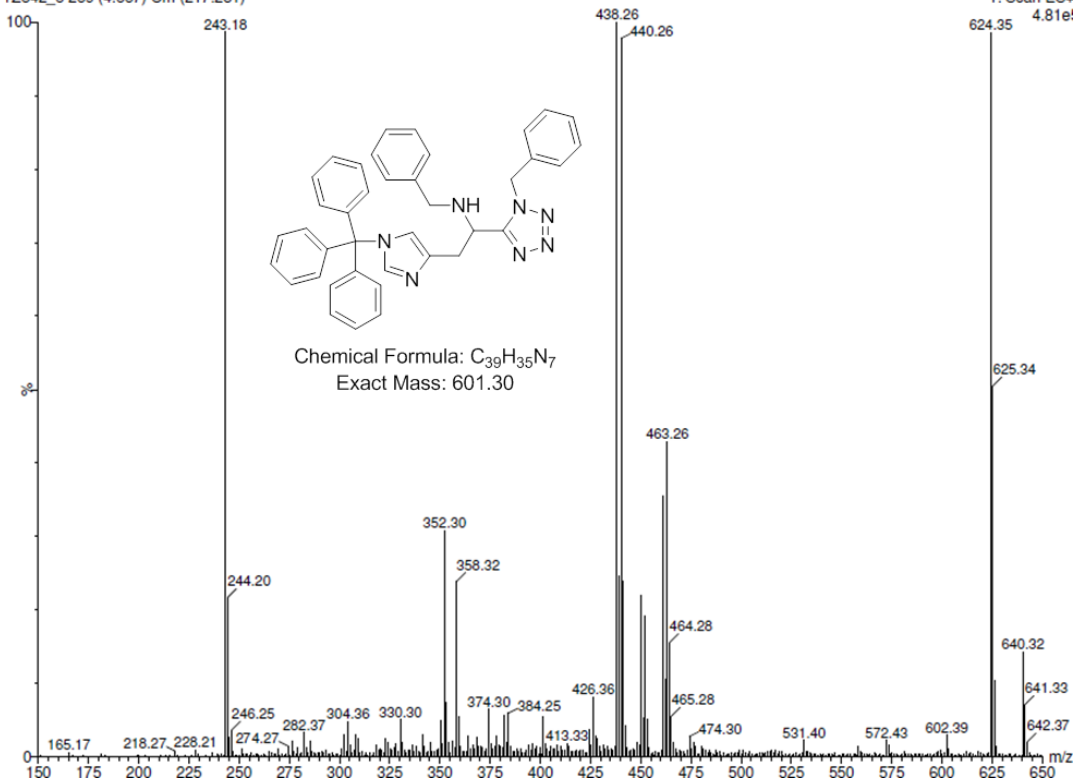

***tert*-Butyl (4-(1-benzyl-1H-tetrazol-5-yl)-4-(benzylamino)butyl)carbamate (5u)**

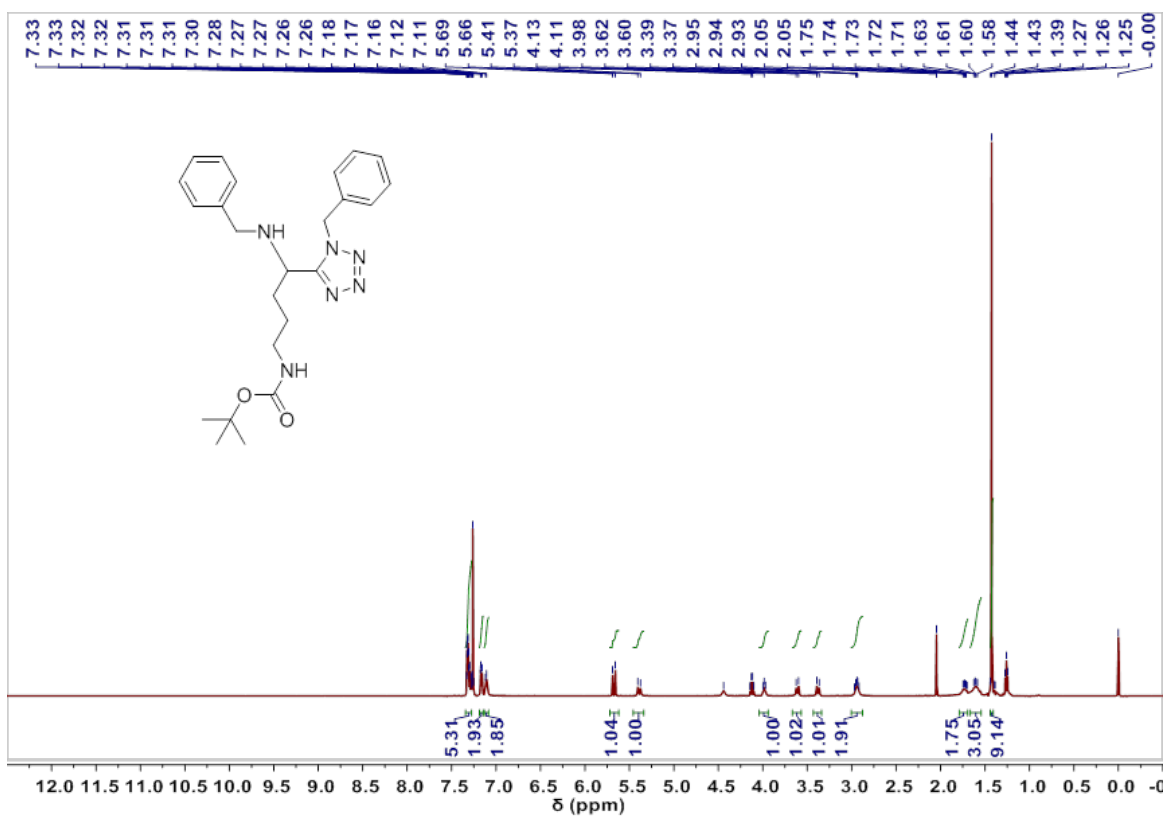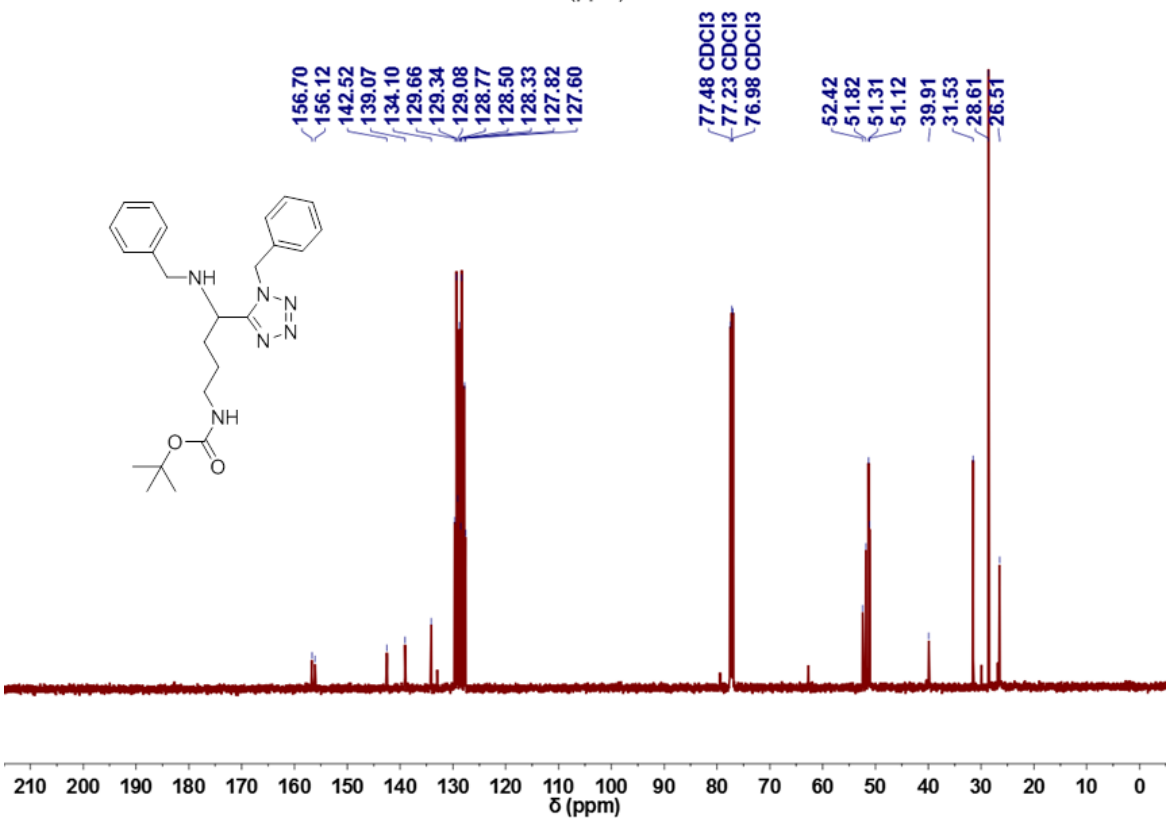

TZ566\_2\_silica\_4.6x250\_sol1\_5-30%\_6min  
TZ566\_2

3: Diode Array  
Range: 2.432

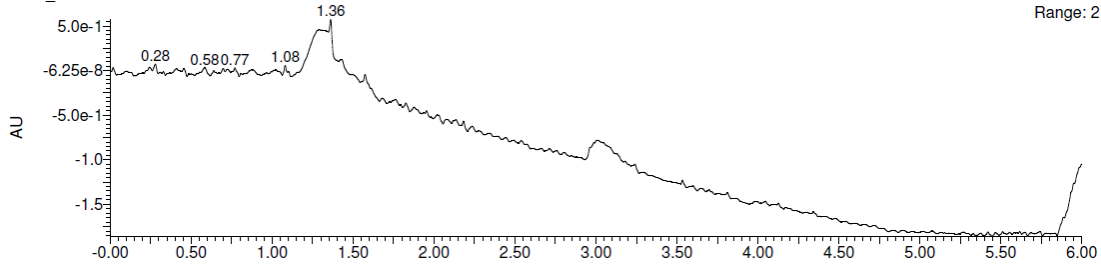

TZ566\_2  
1: Scan ES+  
TIC  
6.22e7

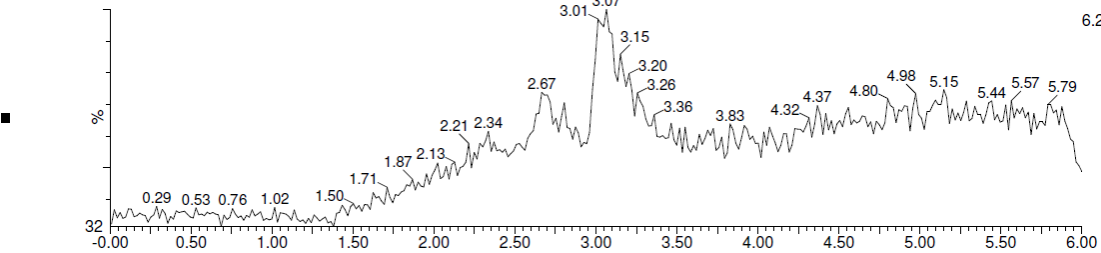

TZ566\_2  
1: Scan ES+  
437  
8.29e6

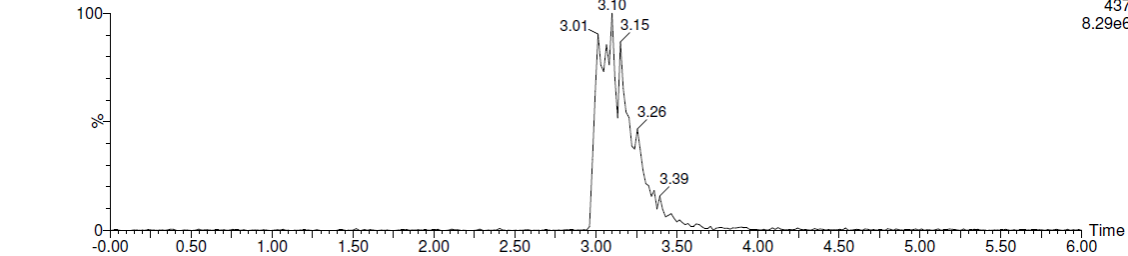

TZ566\_2\_silica\_4.6x250\_sol1\_5-30%\_6min  
TZ566\_2\_177 (3.065) Cm (175:202)

1: Scan ES+  
5.72e6

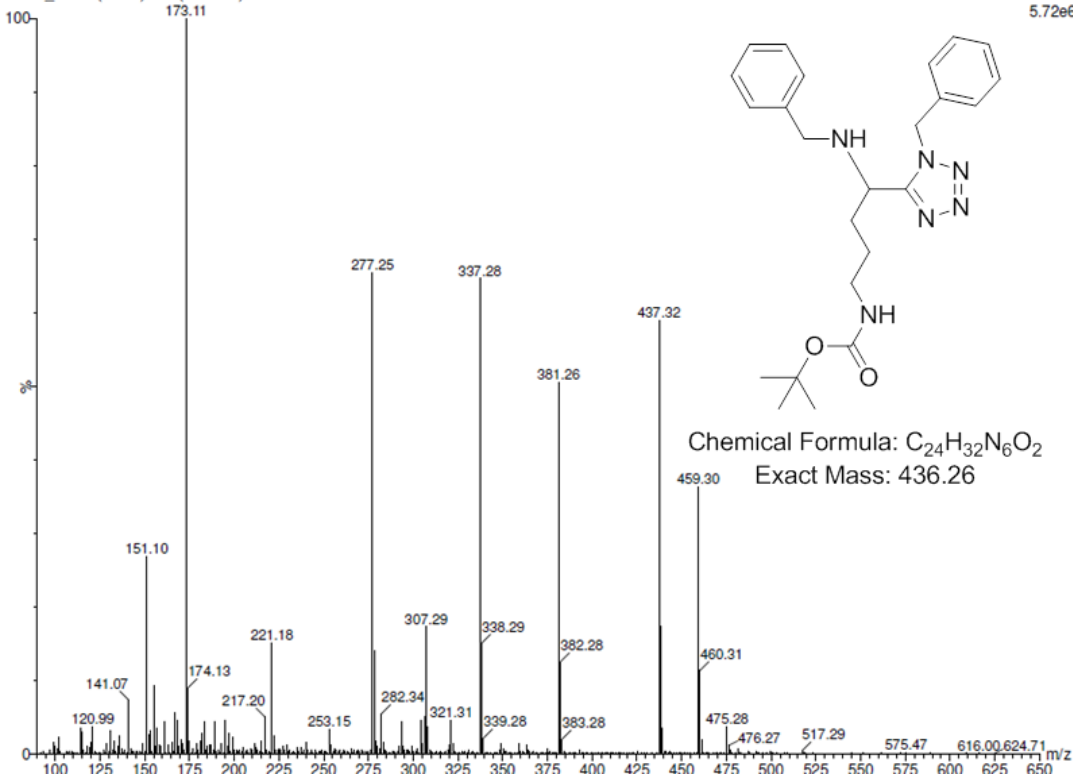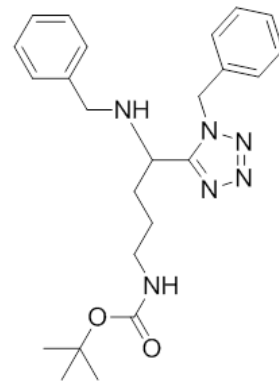

Chemical Formula:  $C_{24}H_{32}N_6O_2$   
Exact Mass: 436.26

1-(4-Benzyl-amino-4-(1-benzyl-tetrazol-5-yl)butyl)diboc-guanidine (5u')

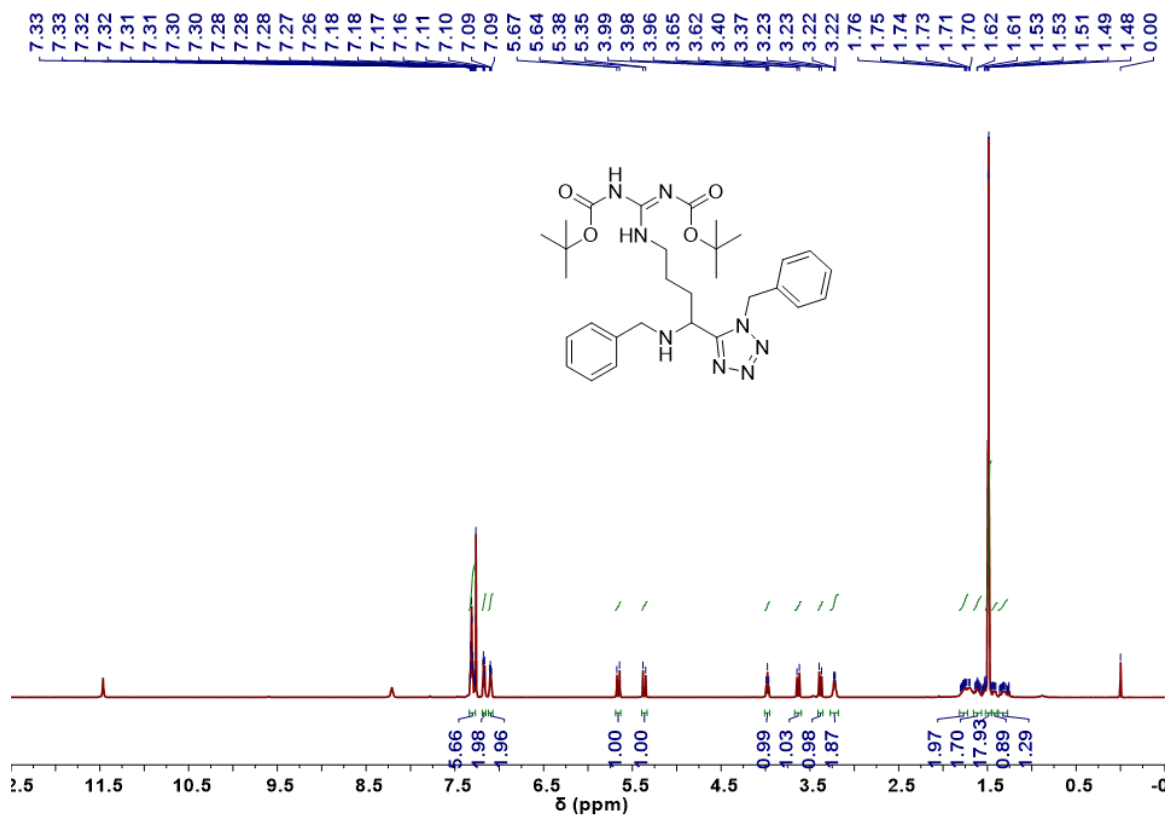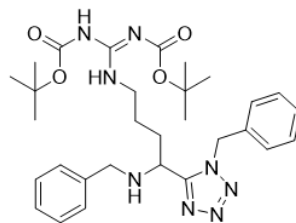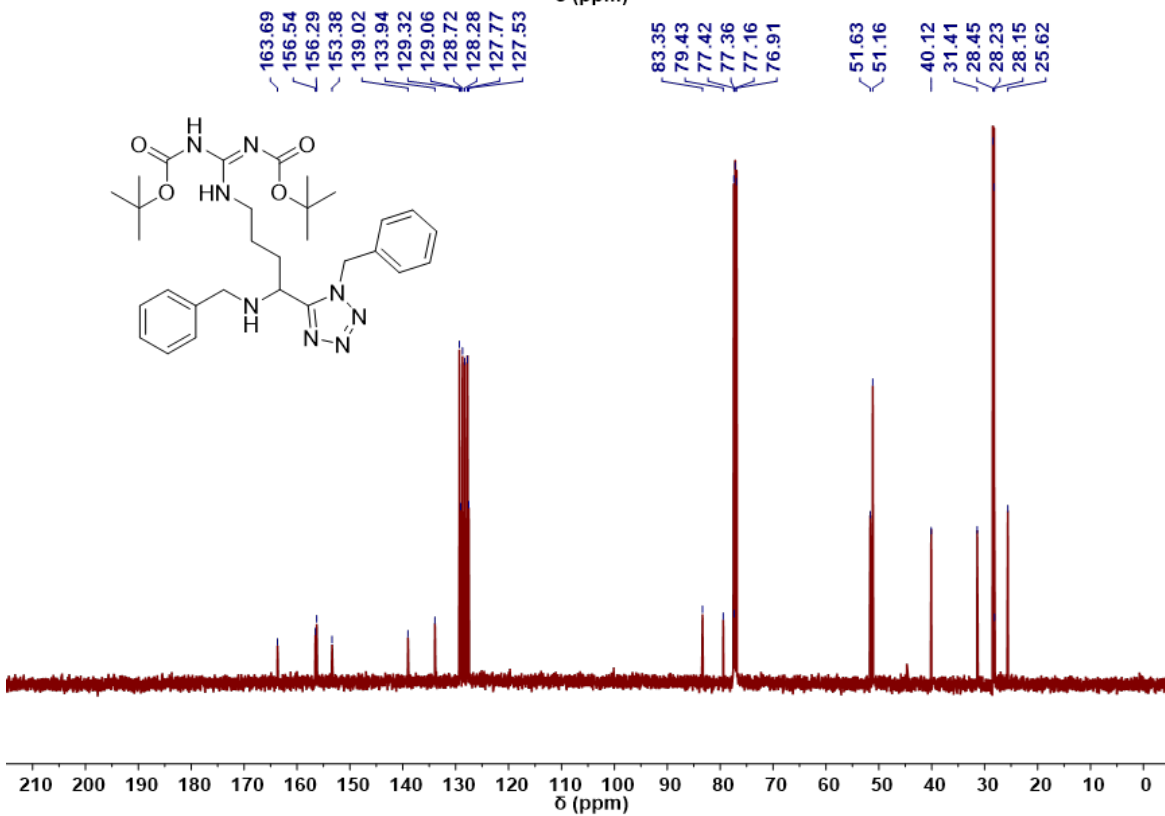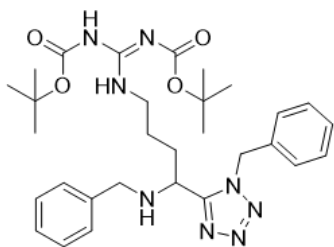



**3-(5-(Pyrrolidin-2-yl)-1H-tetrazol-1-yl)propanenitrile (5v)**

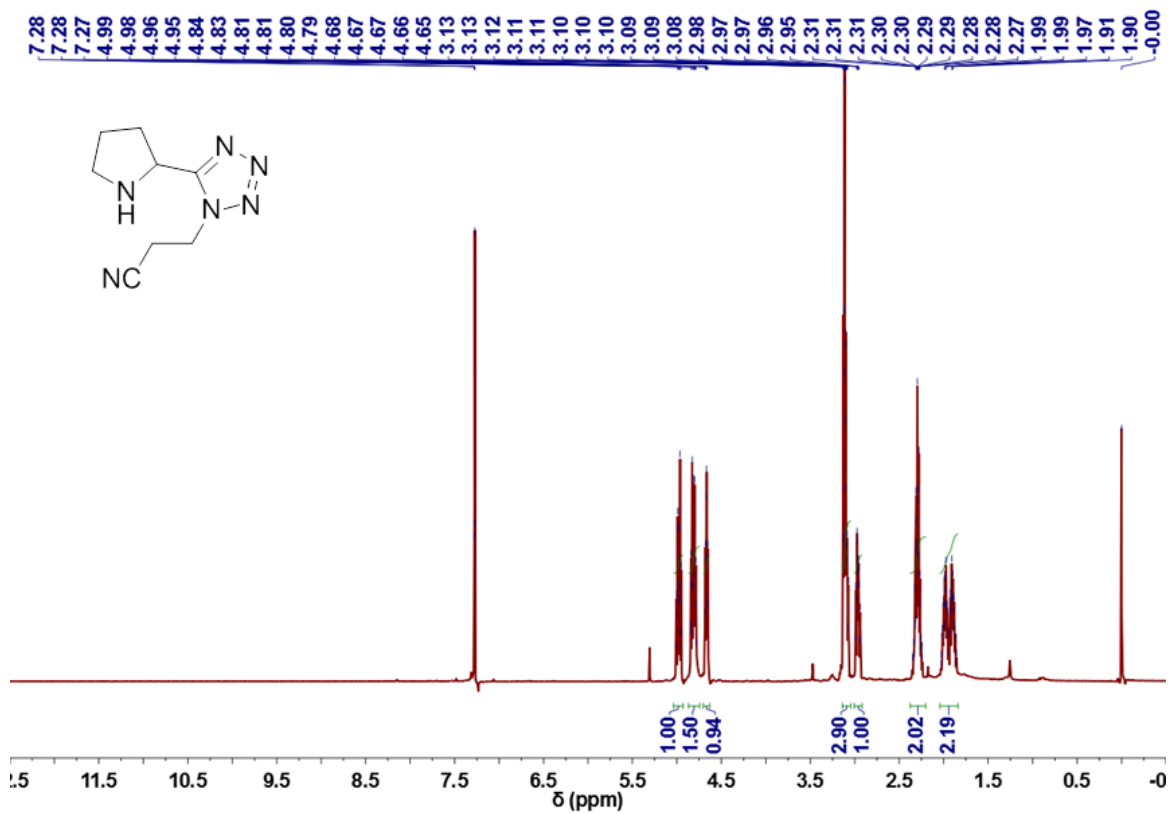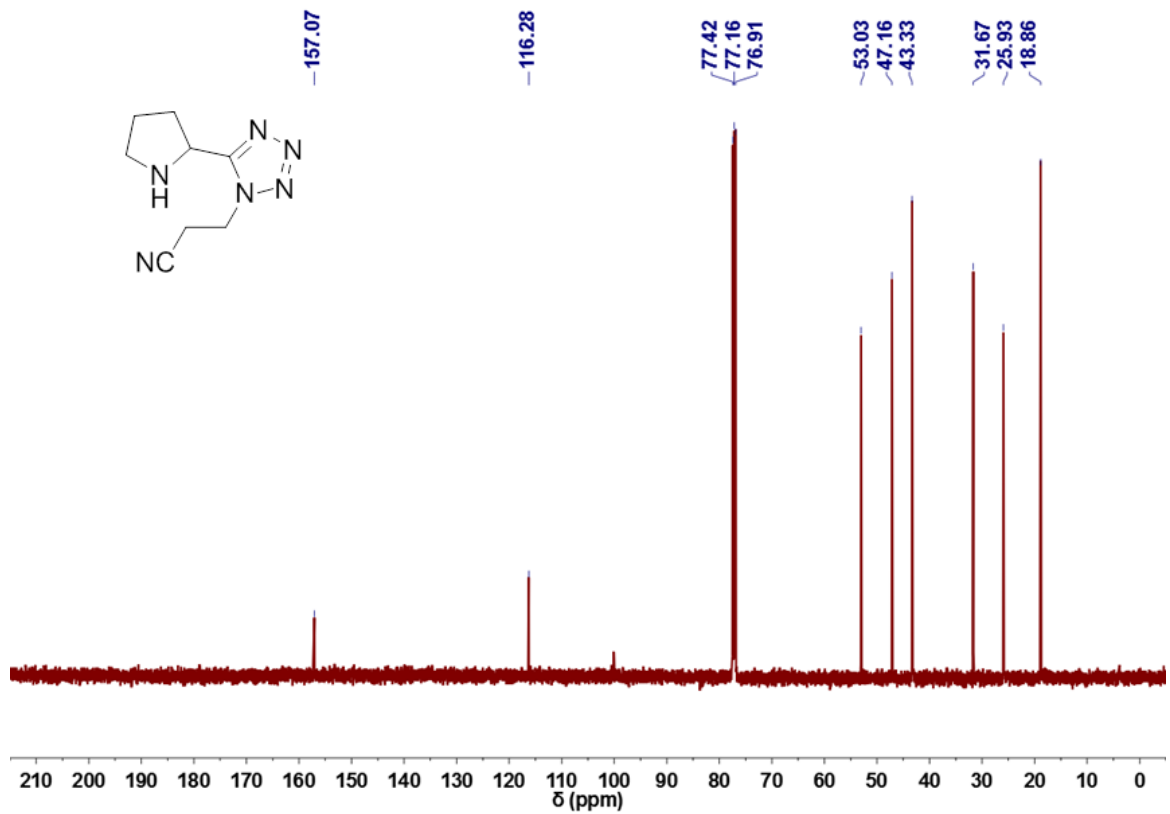

2,2-Dimethyl-4-(1-(2,4,4-trimethylpentan-2-yl)-1H-tetrazol-5-yl)thiazolidine (5w)

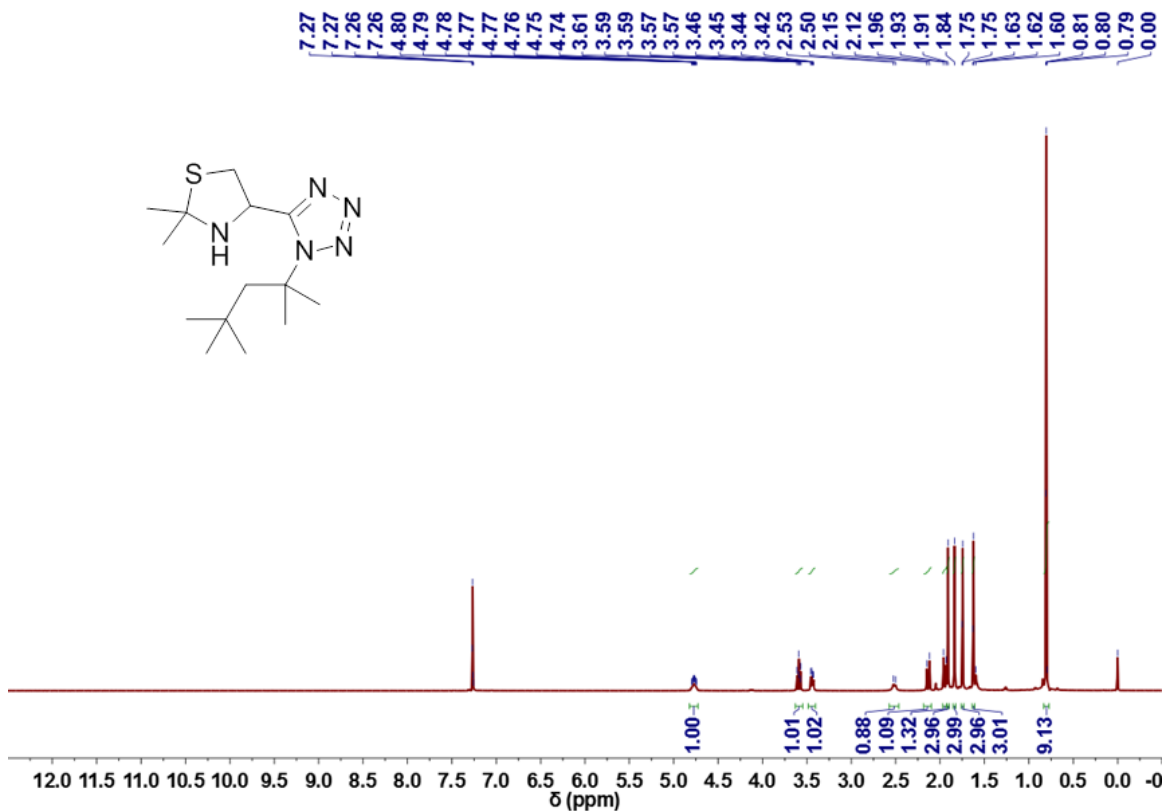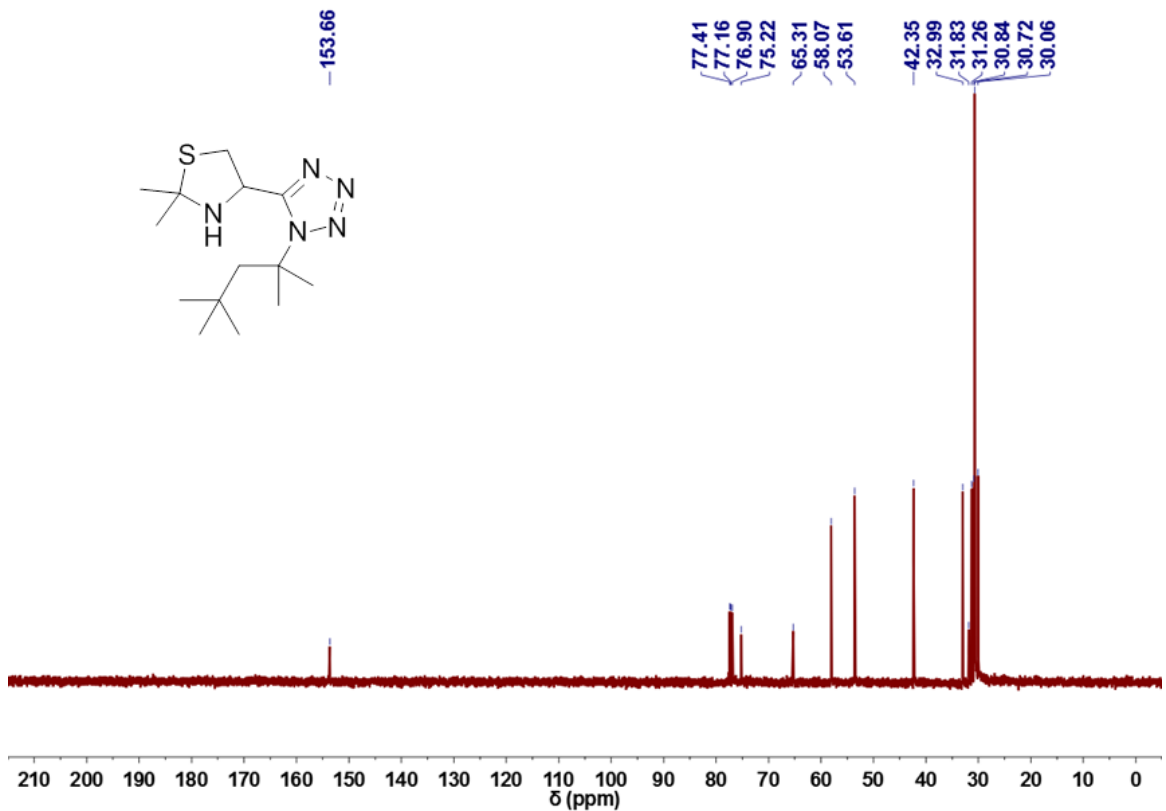

TZ780\_1\_Col4\_Sol1\_5-30%\_6min

TZ780\_1

3: Diode Array  
Range: 3.257

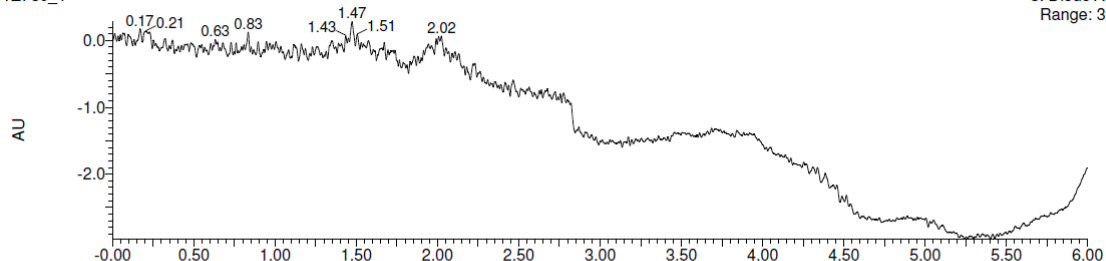

TZ780\_1

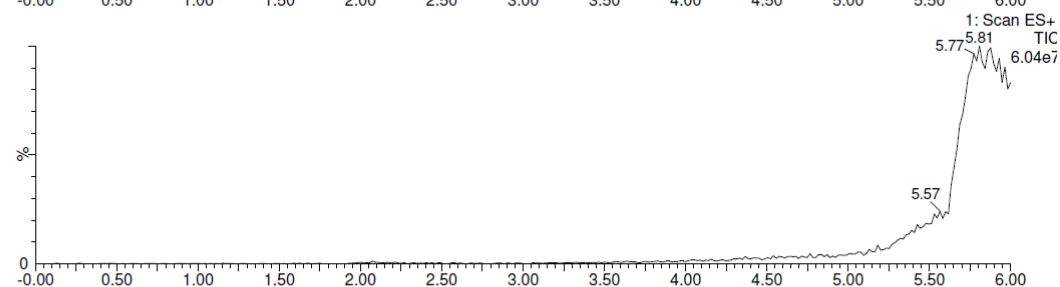

TZ780\_1

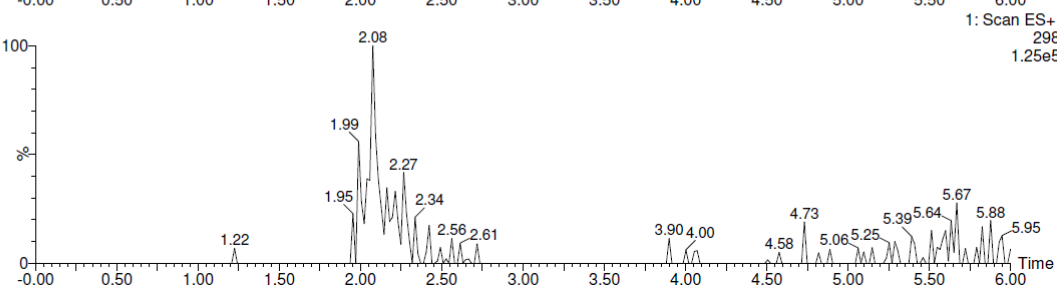

TZ780\_1\_Col4\_Sol1\_5-30%\_6min

TZ780\_1 120 (2.075) Cm (114:135)

1: Scan ES+  
3.70e4

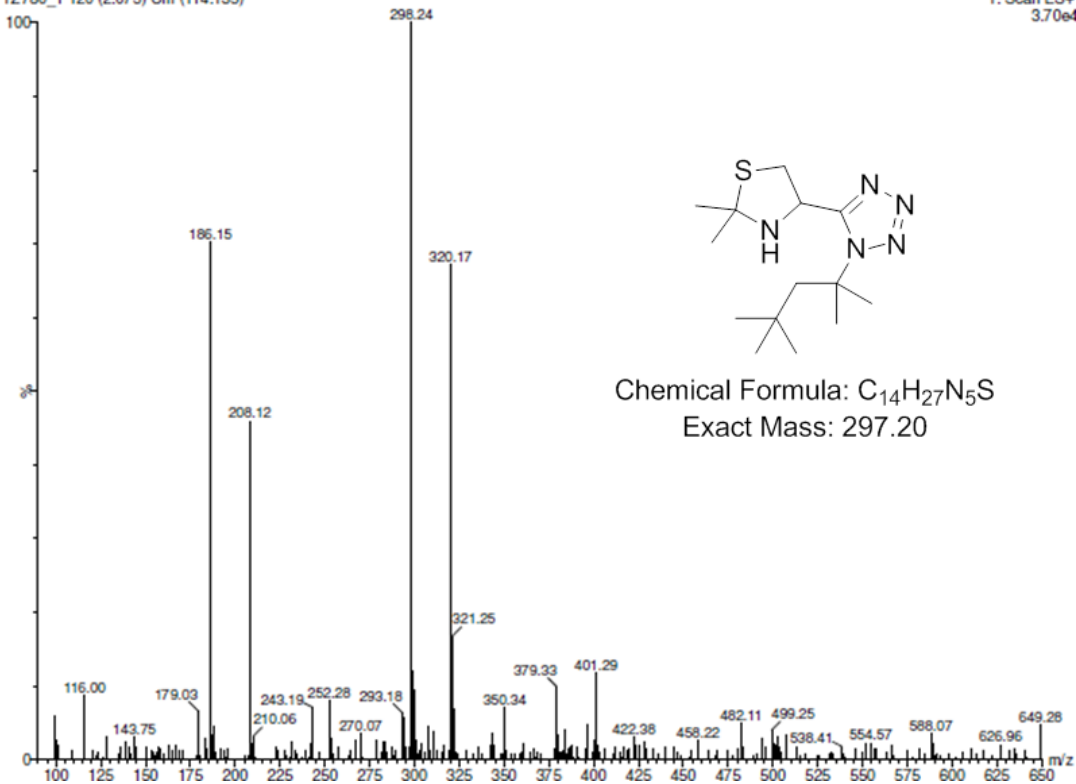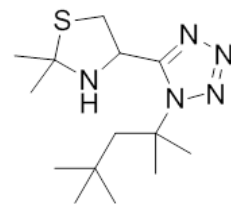

Chemical Formula: C<sub>14</sub>H<sub>27</sub>N<sub>5</sub>S  
Exact Mass: 297.20

(1H-Tetrazol-5-yl)methanamine hydrogen chloride (6a)

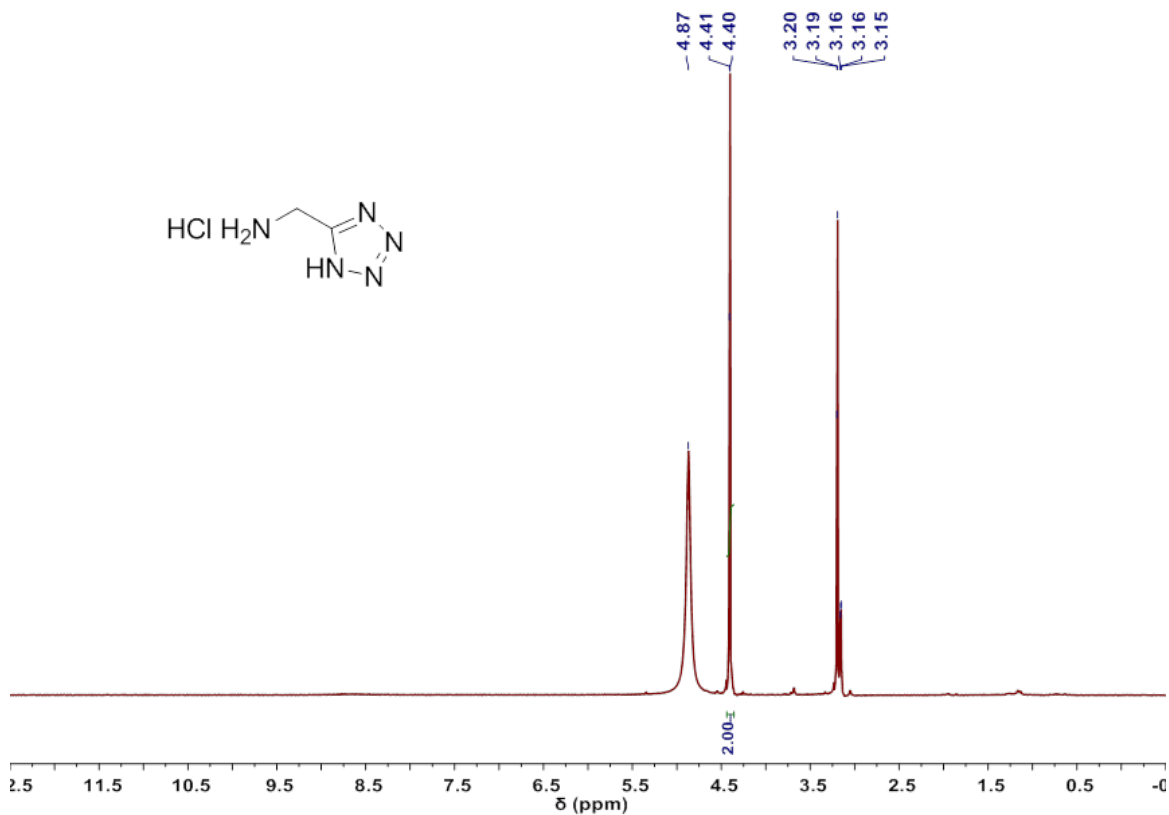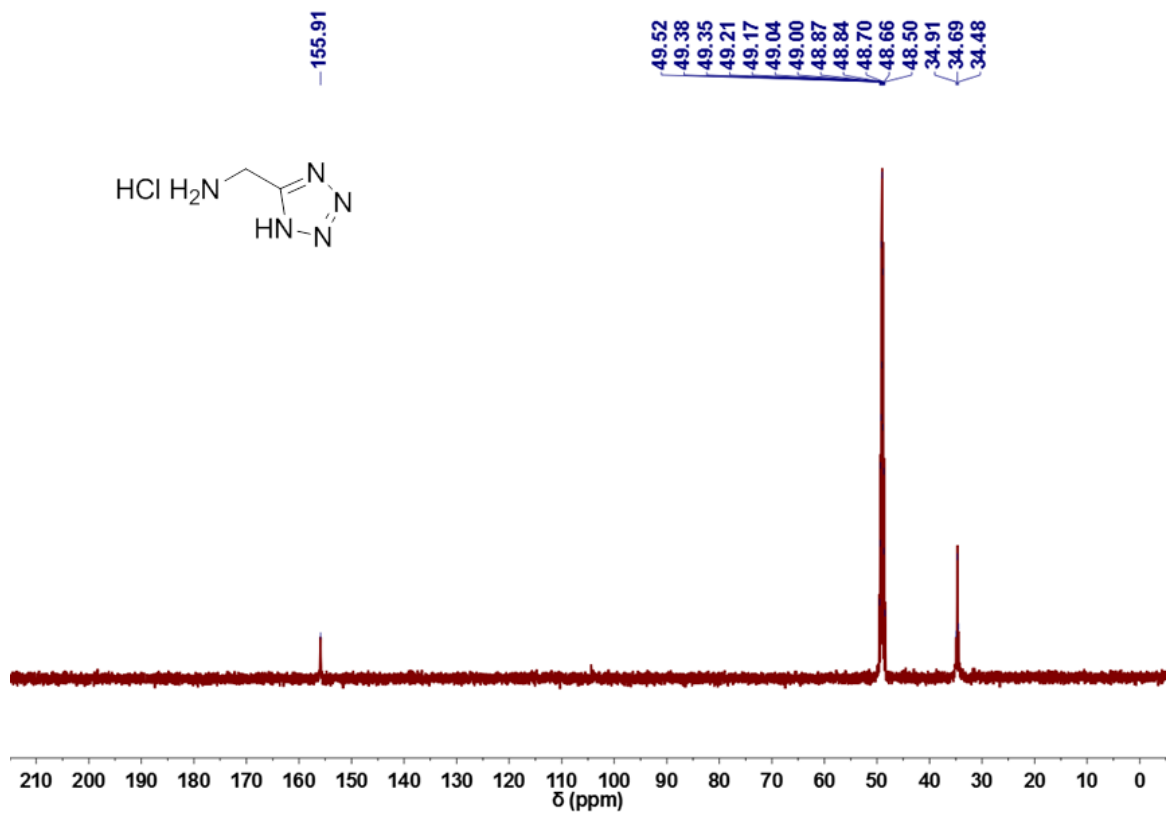

## 2-Phenyl-1-(1H-tetrazol-5-yl)ethanamine hydrogen chloride (6b)

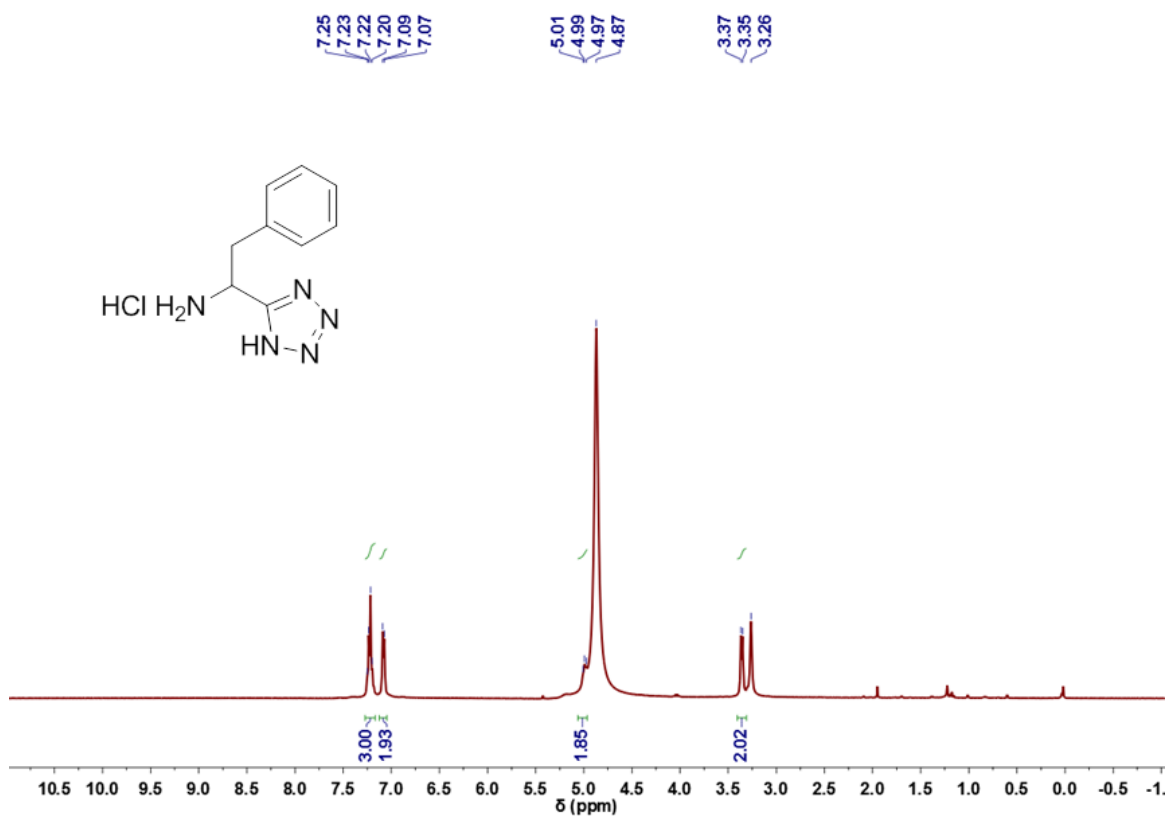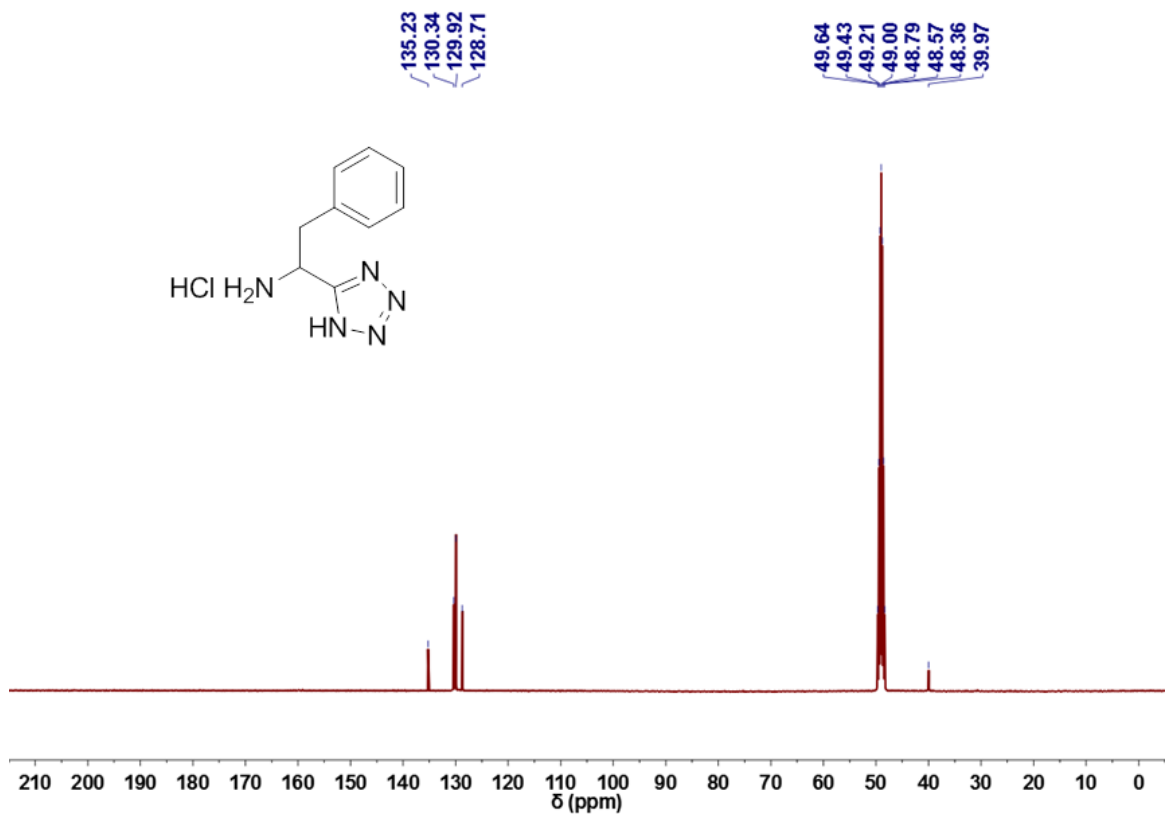

# 1-(1H-Tetrazol-5-yl)ethanamine hydrogen chloride (6c)

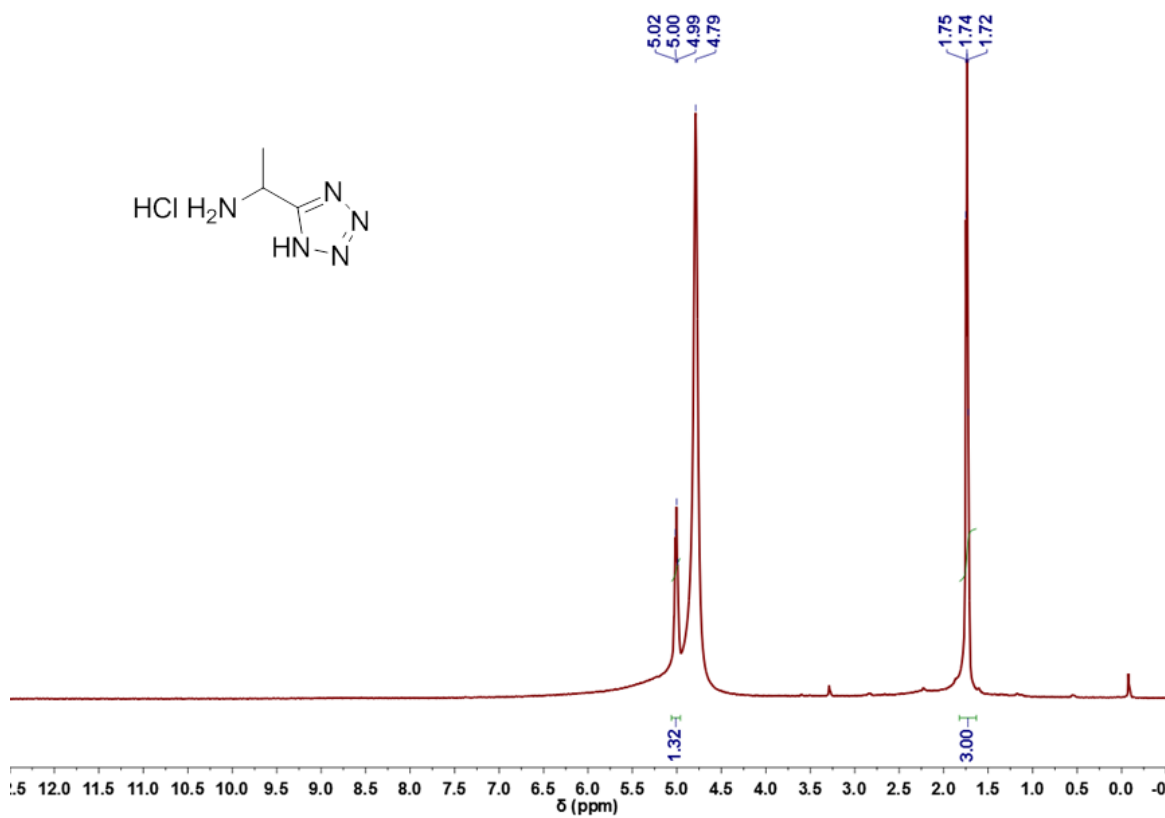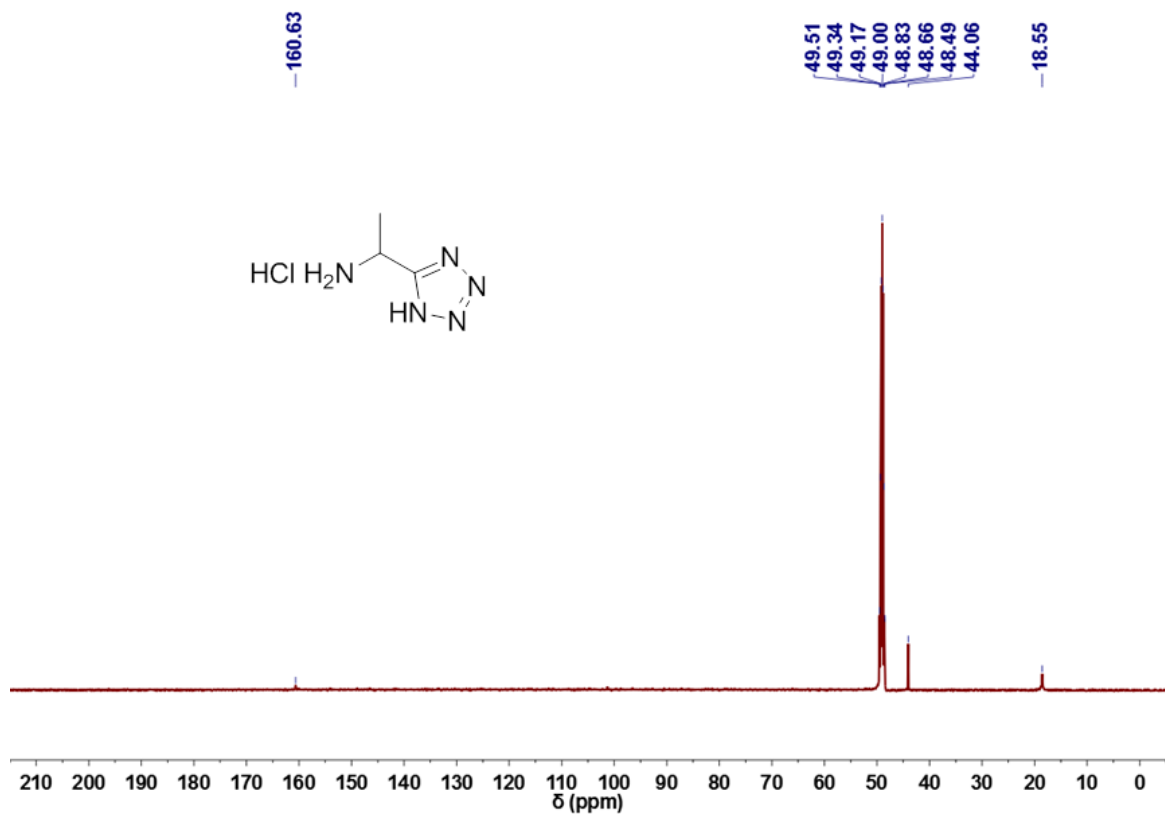

### 4-Amino-4-(1H-tetrazol-5-yl)butanoic acid (6d)

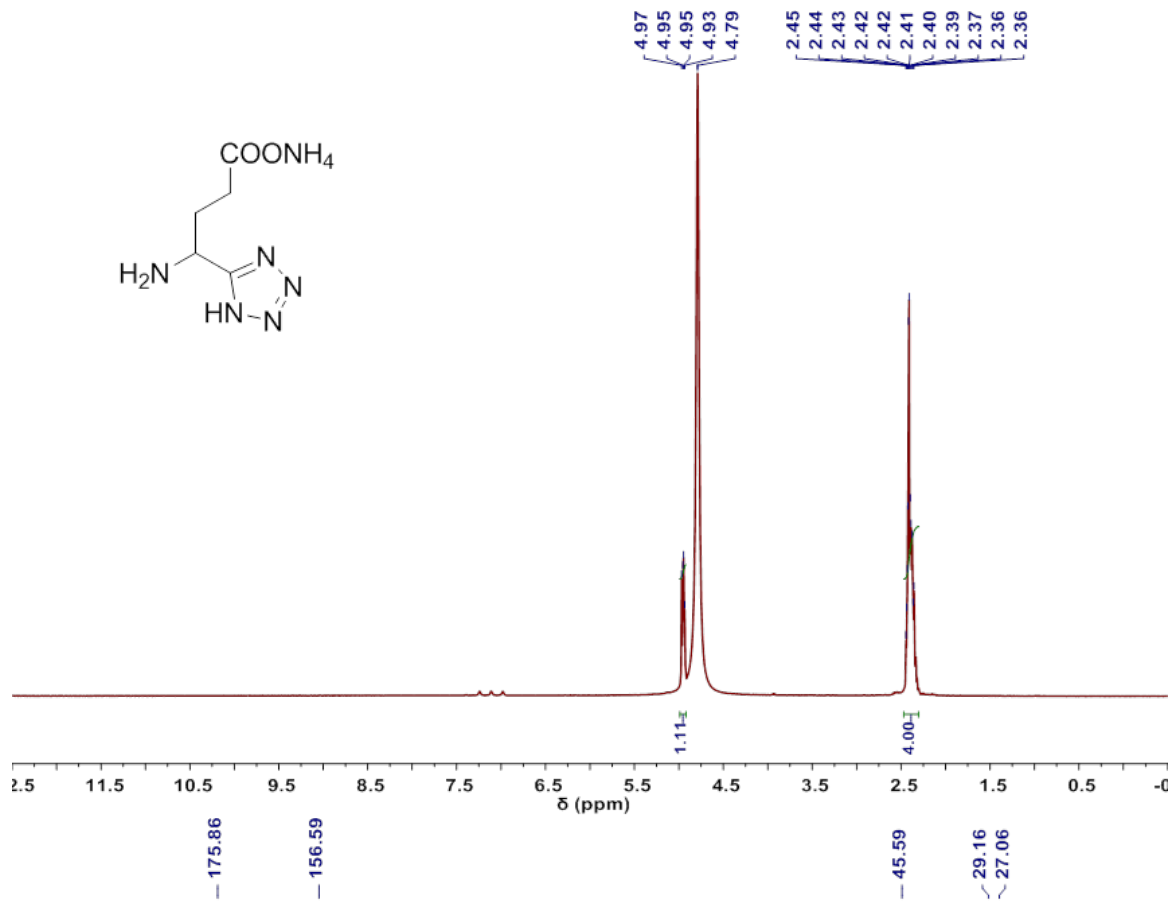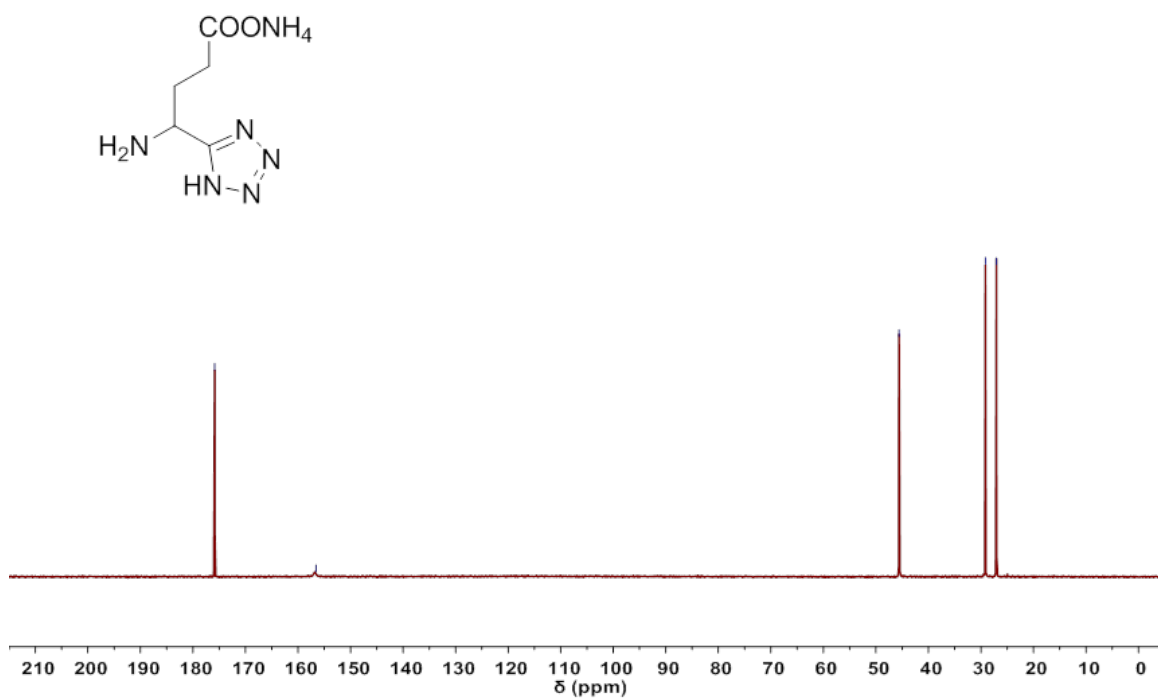

1-(1H-Tetrazol-5-yl)pentane-1,5-diamine dihydrochloride (6e)

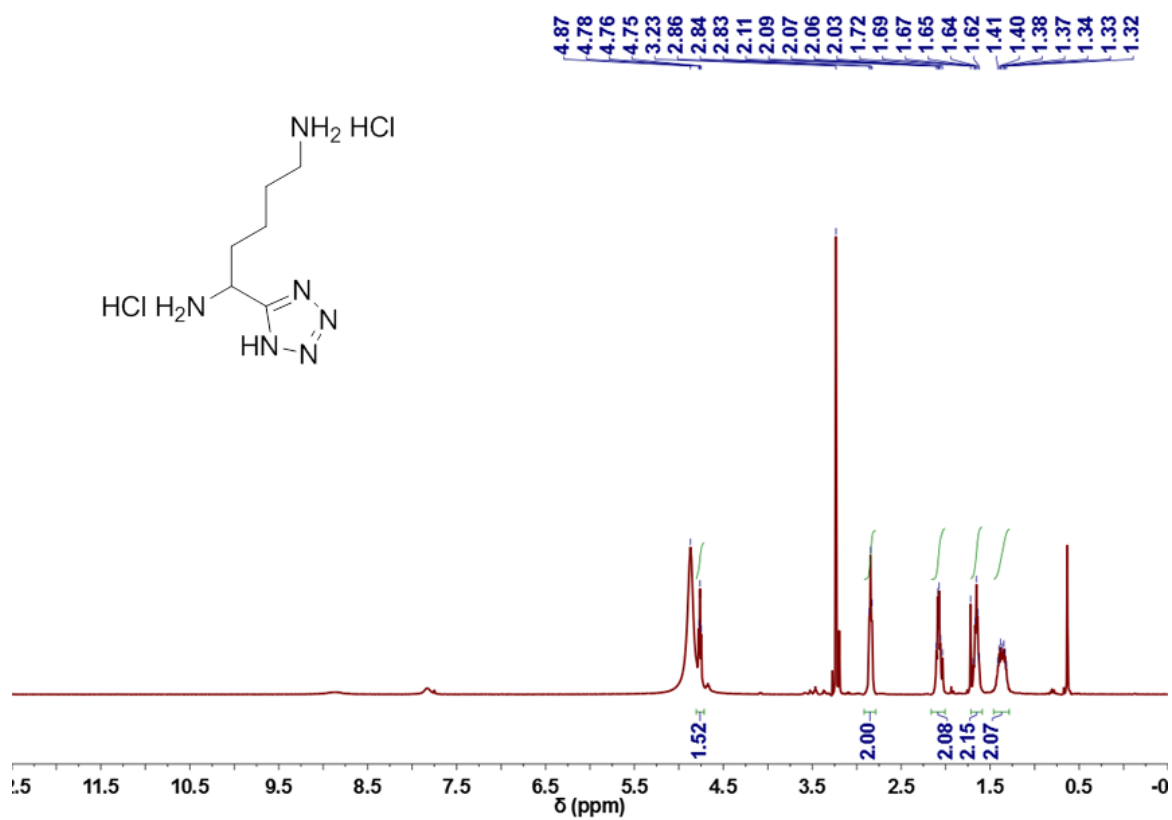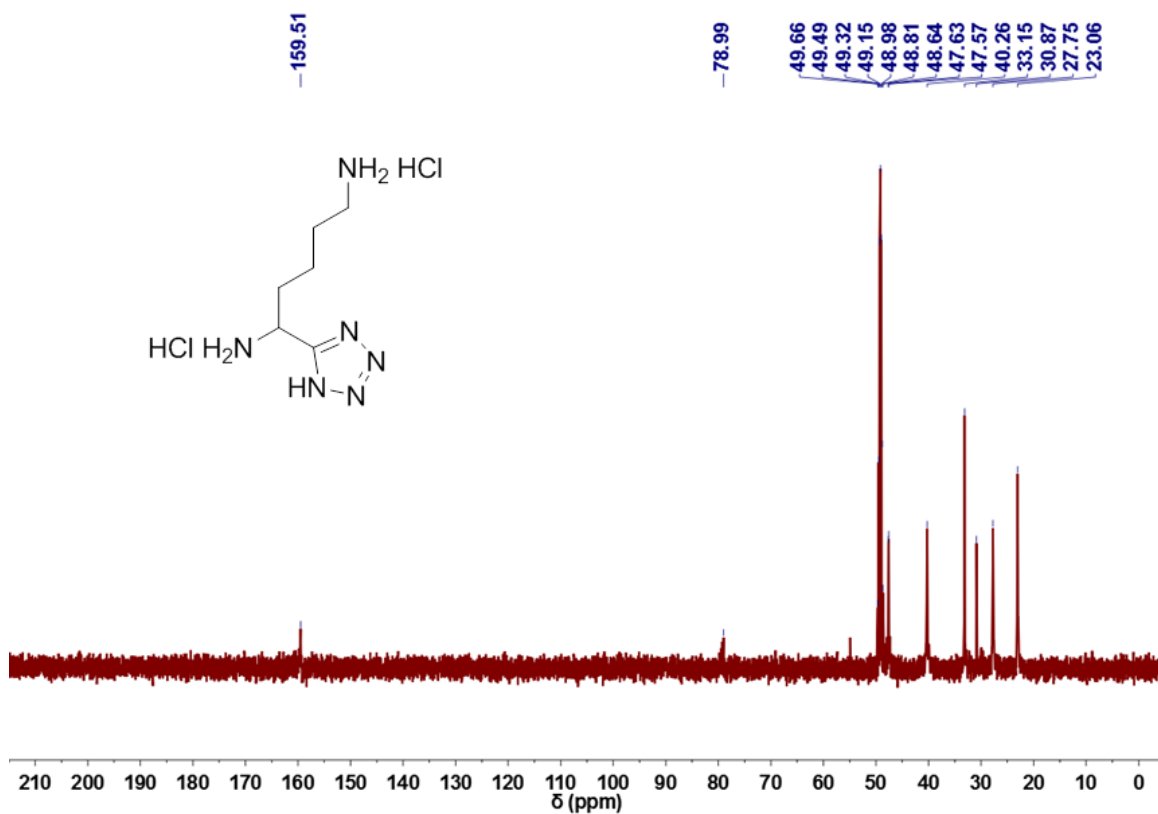



3-Methyl-1-(1H-tetrazol-5-yl)butan-1-amine hydrogen chloride (6f)

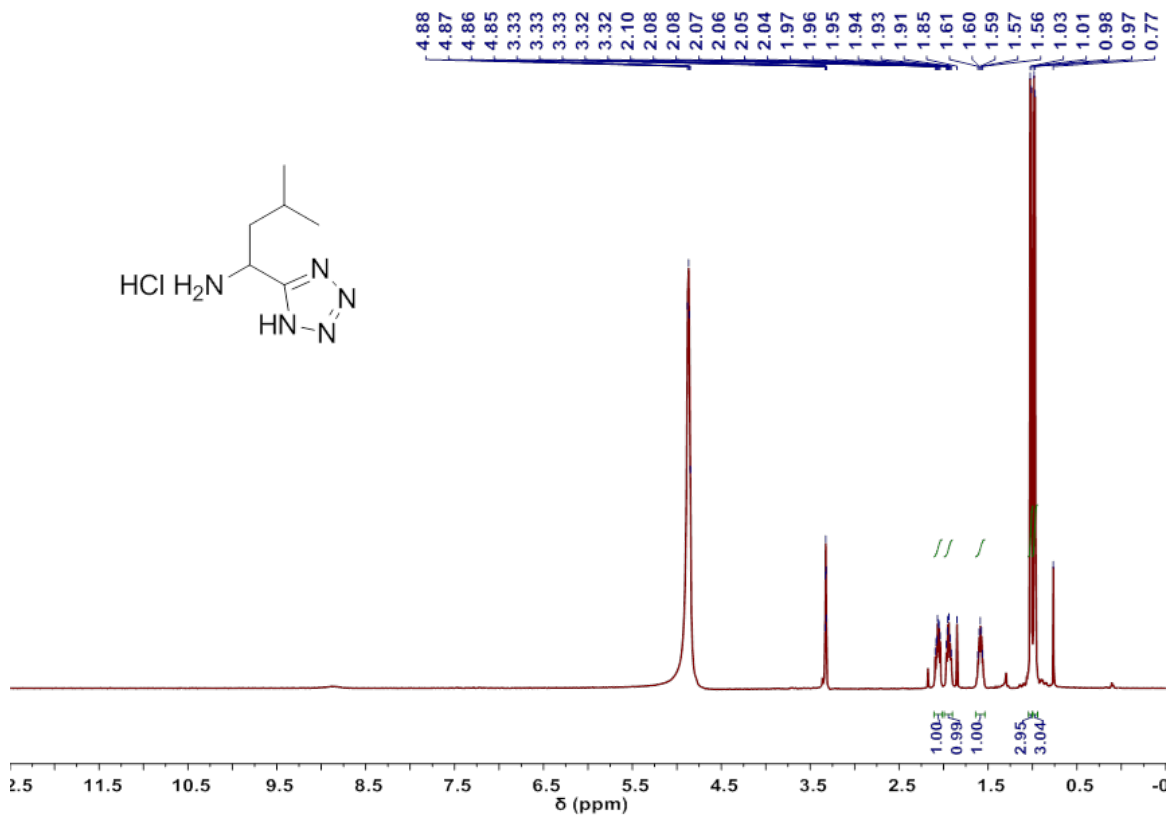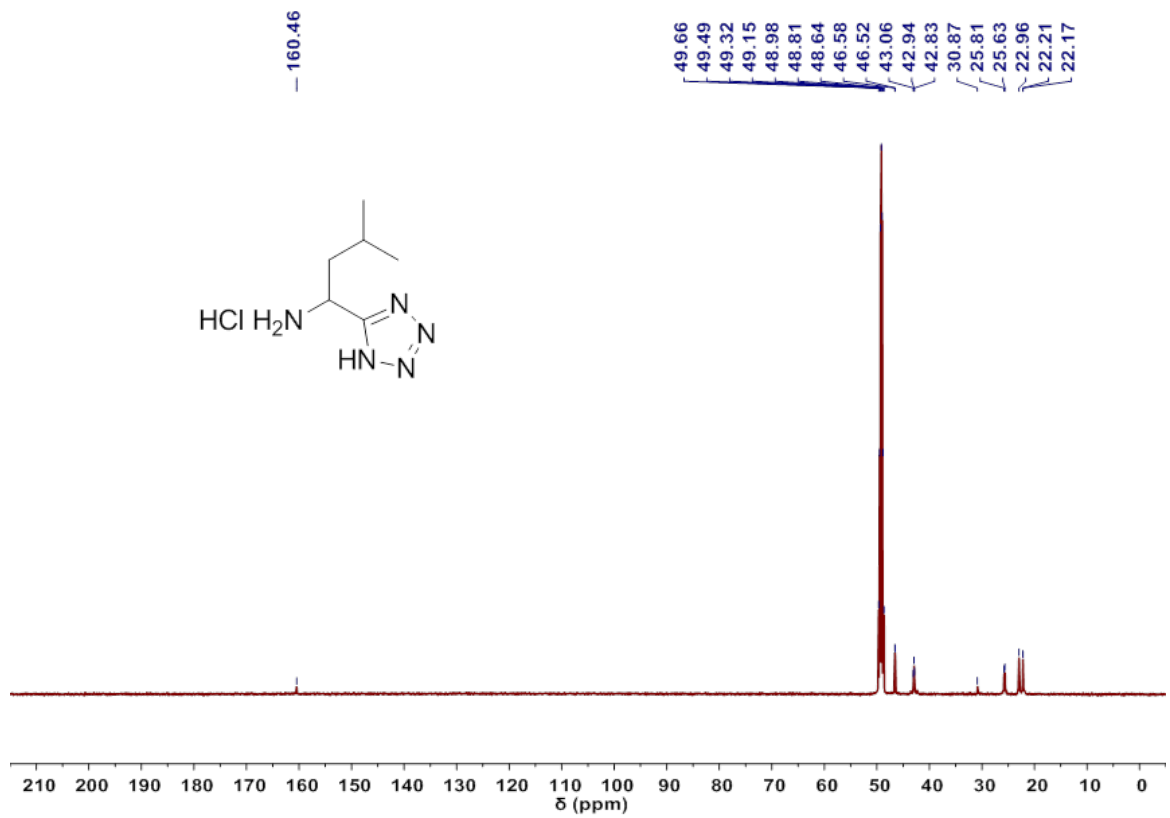

### 3-(Methylthio)-1-(1H-tetrazol-5-yl)propan-1-amine hydrochloride (6g)

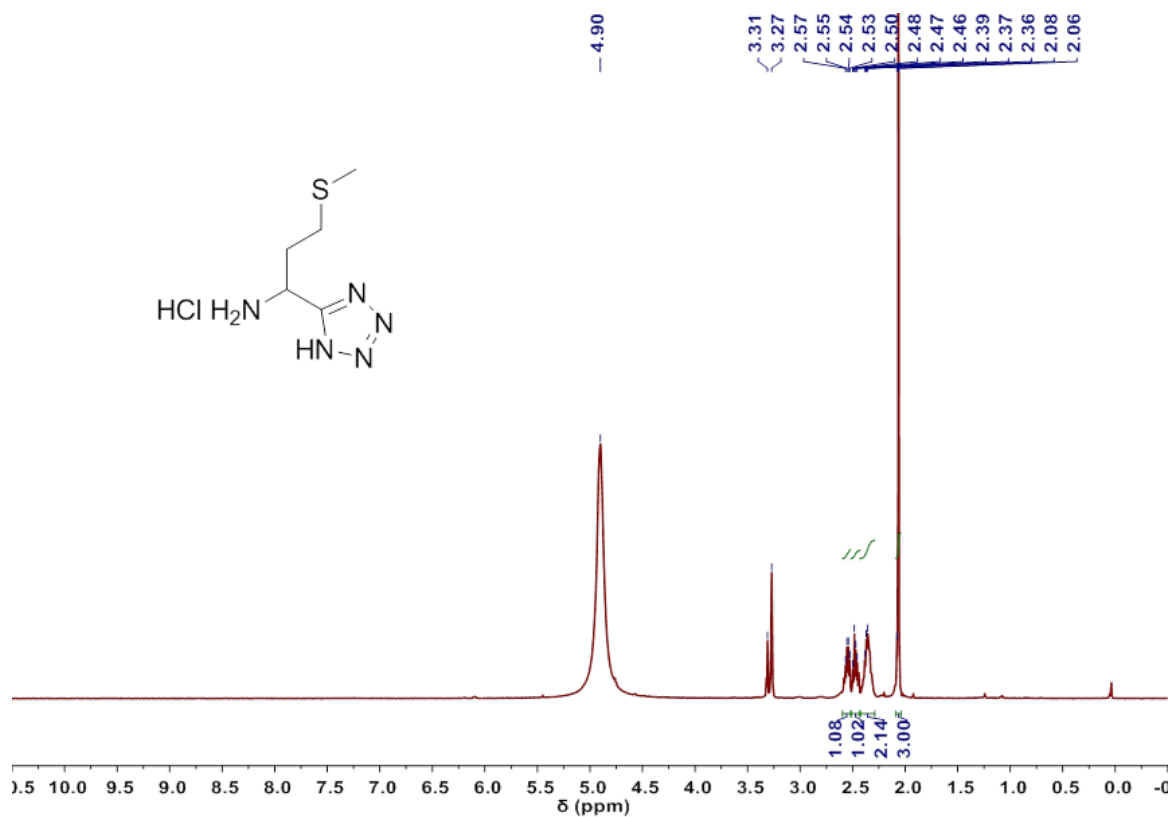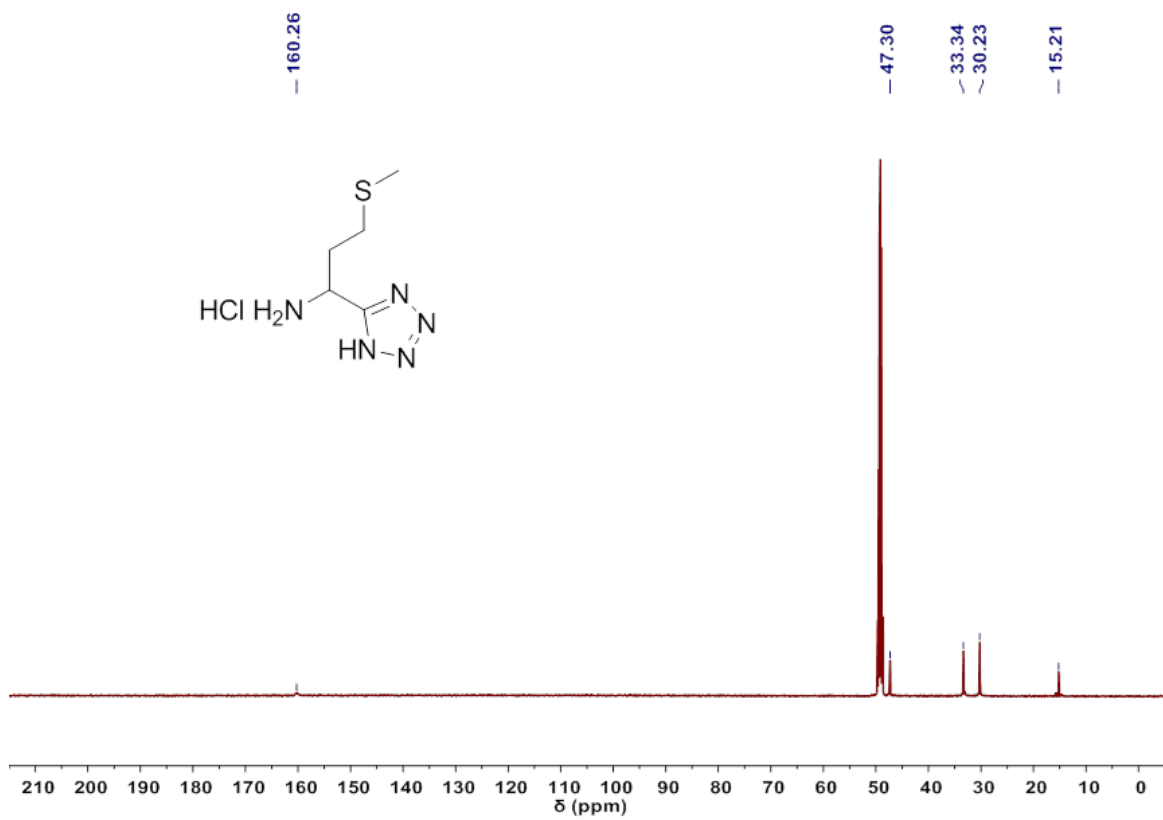

**1-(1H-Tetrazol-5-yl)butan-1-amine hydrogen chloride (6h)**

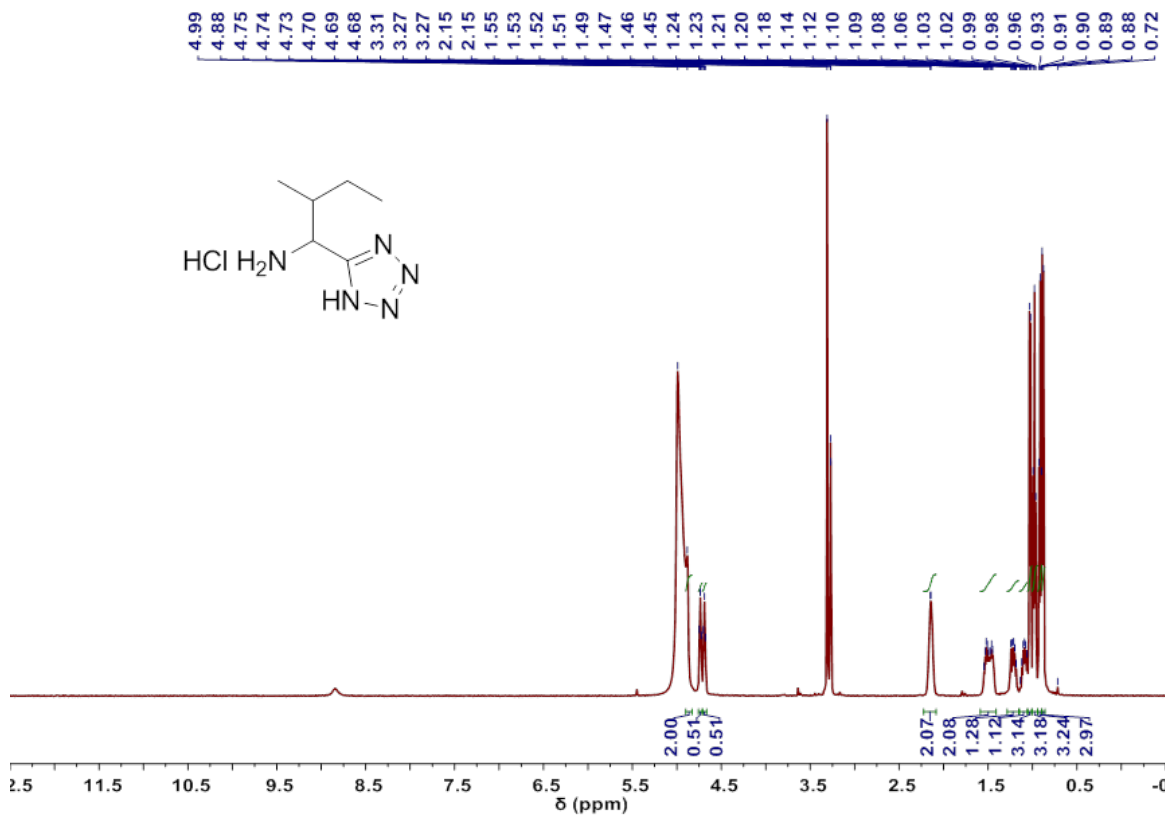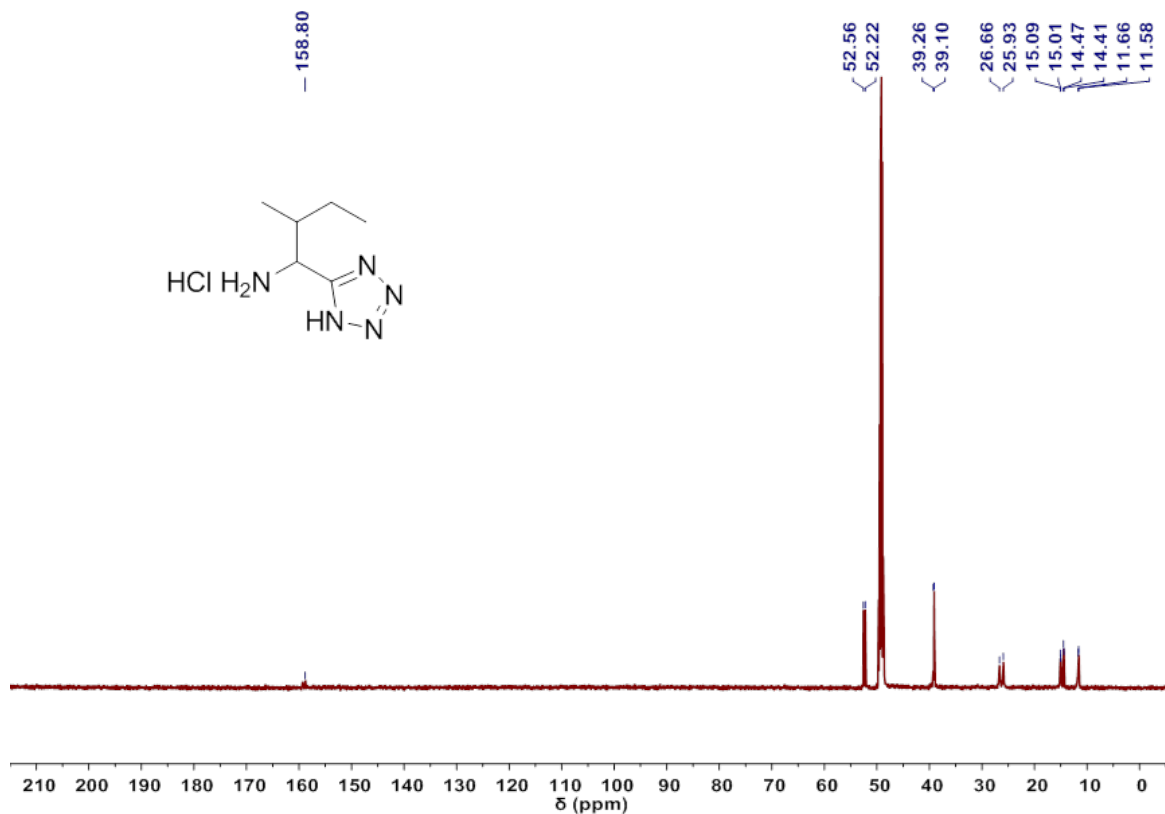

## 2-Methyl-1-(1H-tetrazol-5-yl)propan-1-amine hydrogen chloride (6i)

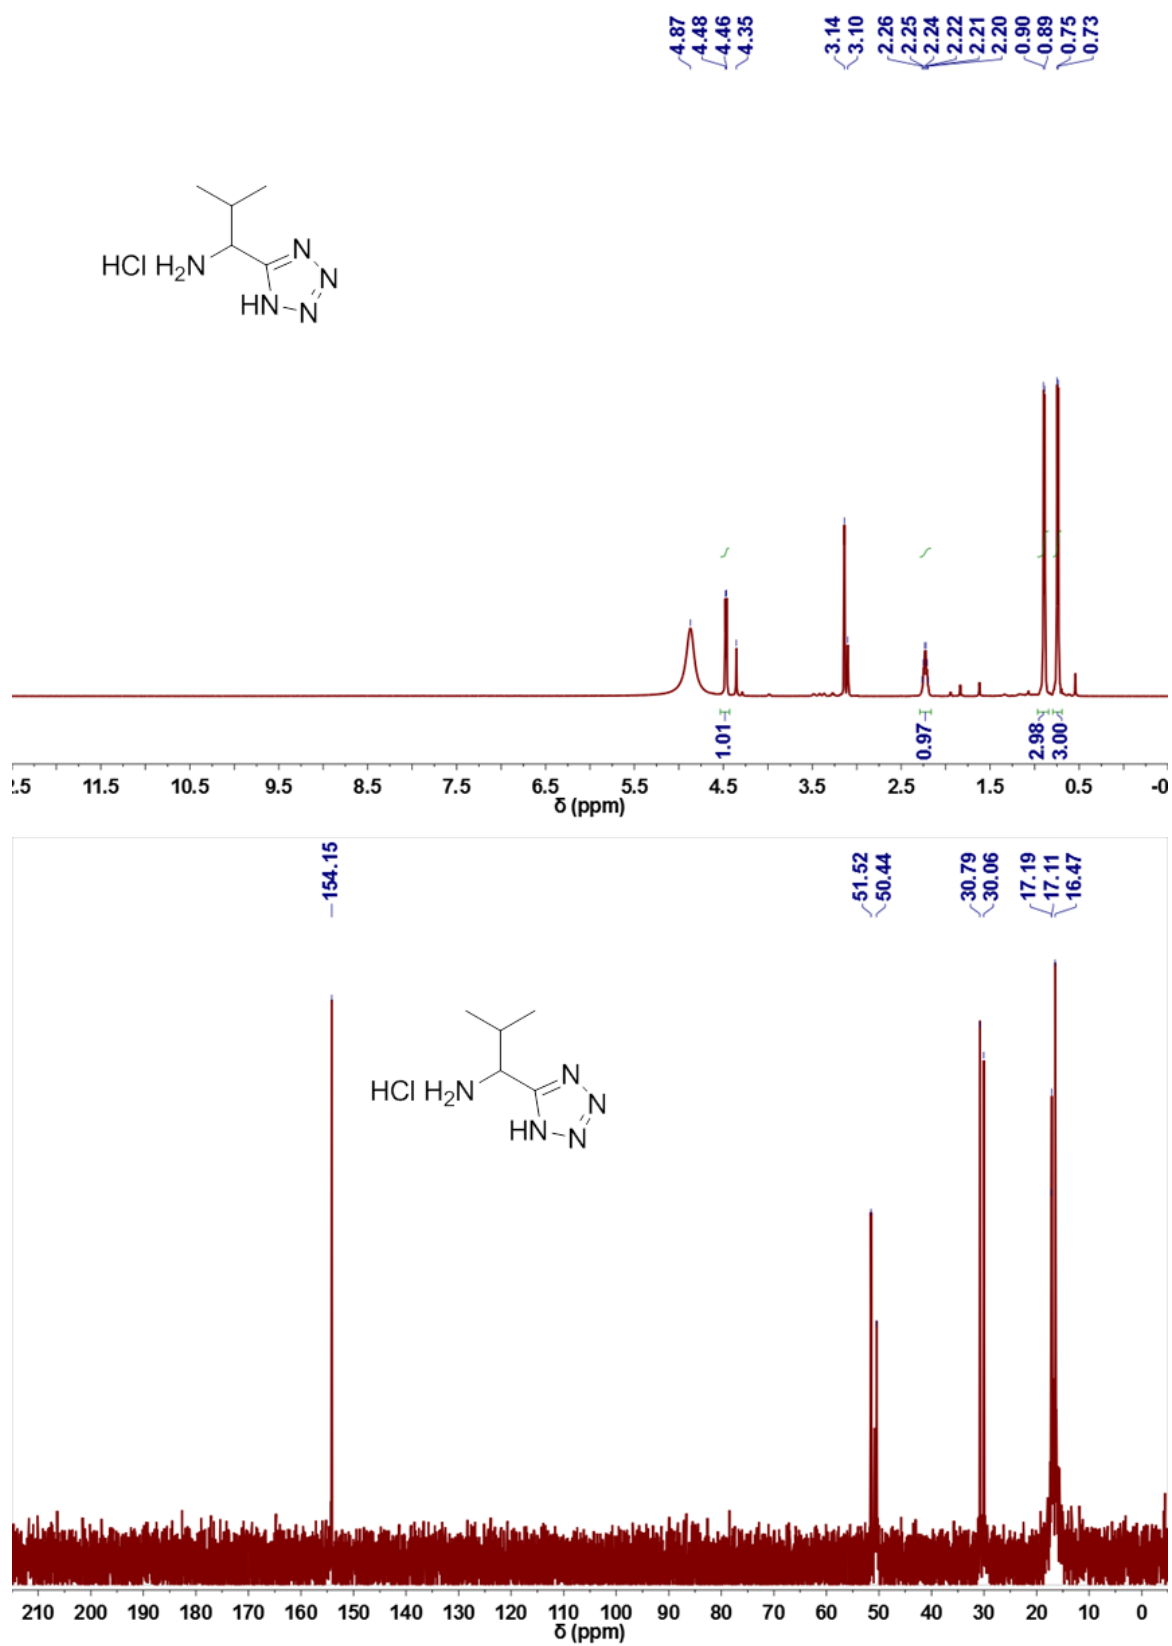

# Cyclopropyl(1H-tetrazol-5-yl)methanamine hydrochloride (6j)

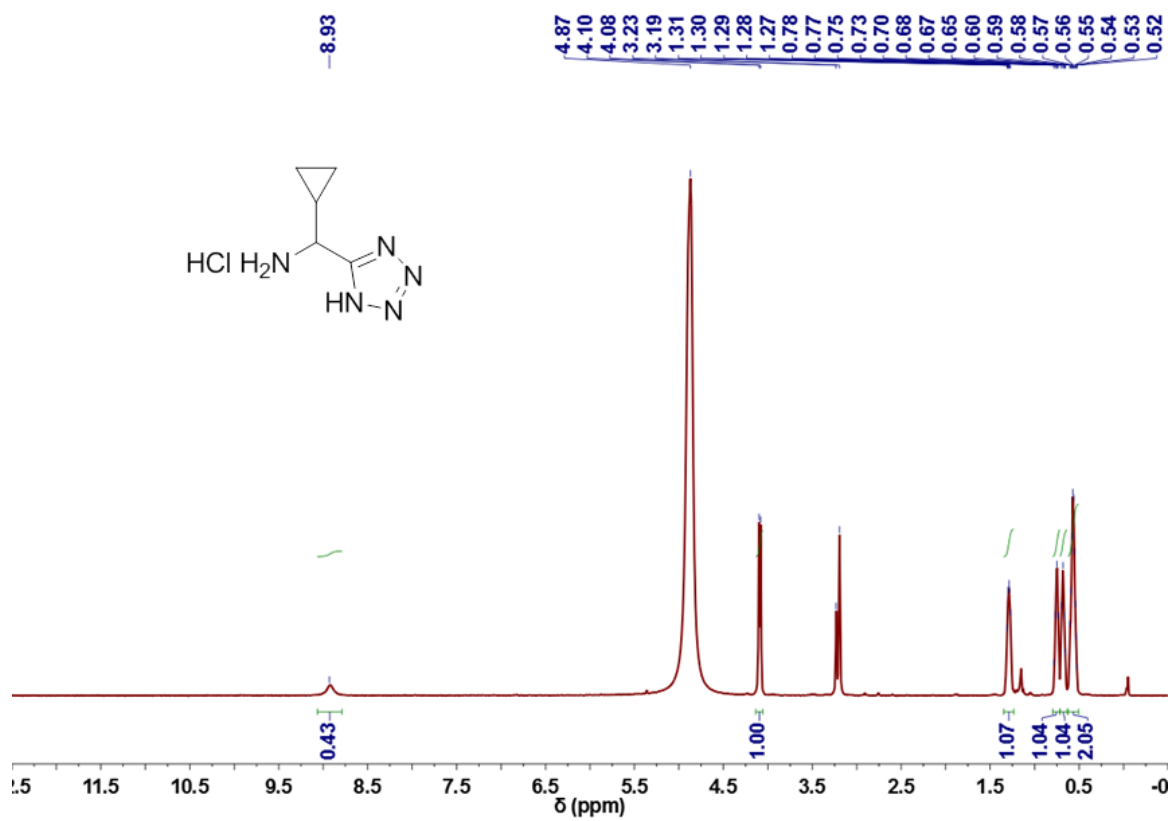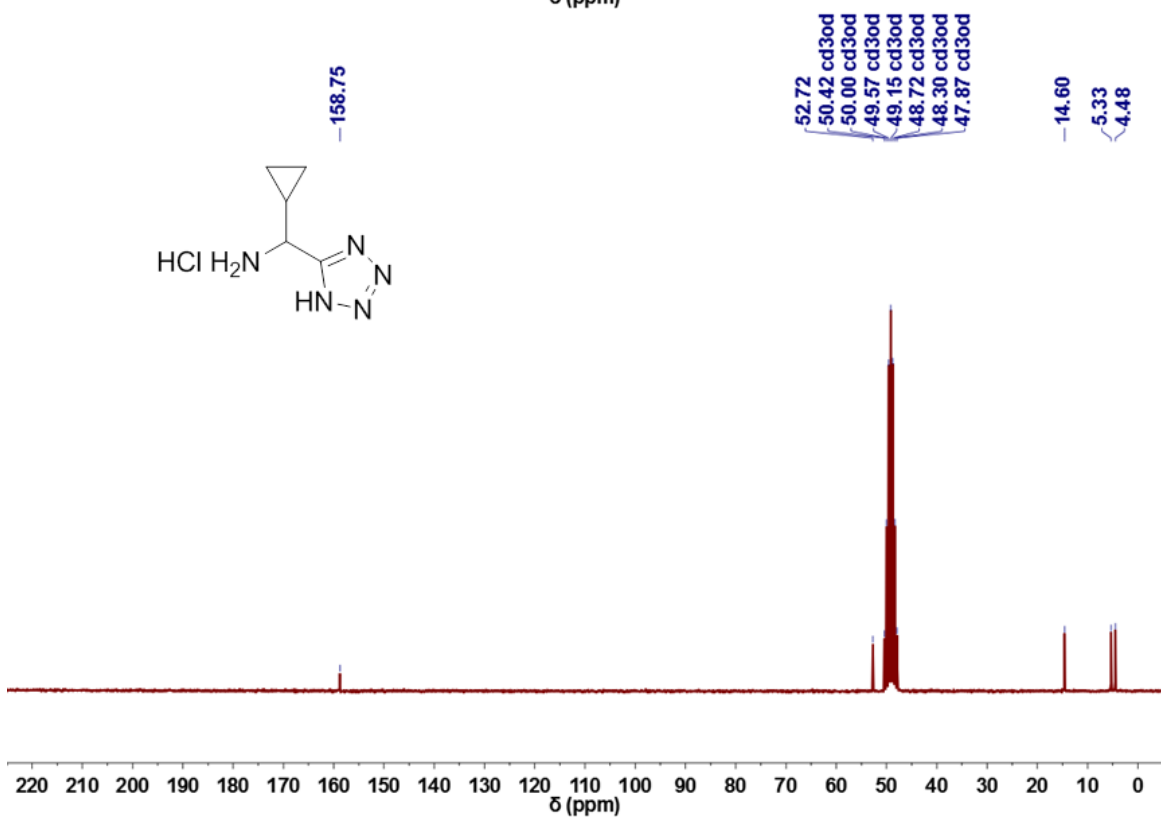

Cyclohexyl(1H-tetrazol-5-yl)methanamine hydrogen chloride (6k)

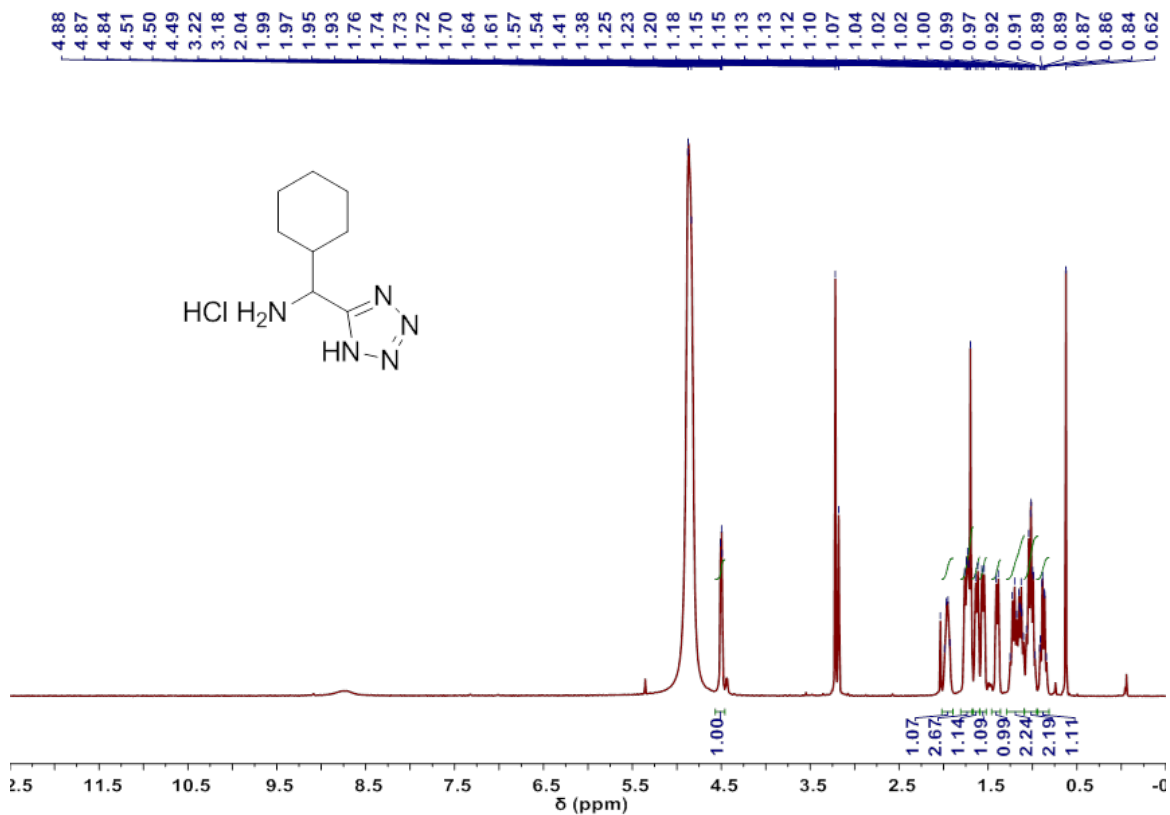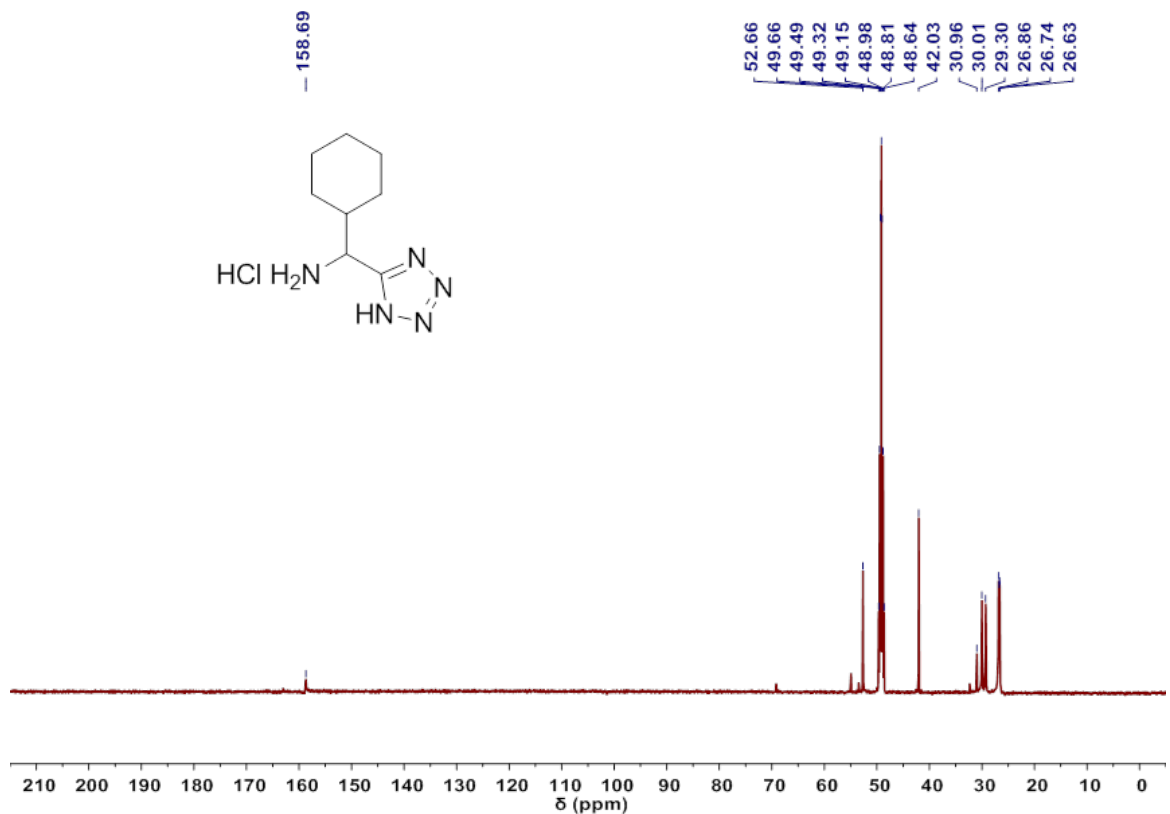

### 3-Phenyl-1-(1H-tetrazol-5-yl)propan-1-amine hydrogen chloride (6l)

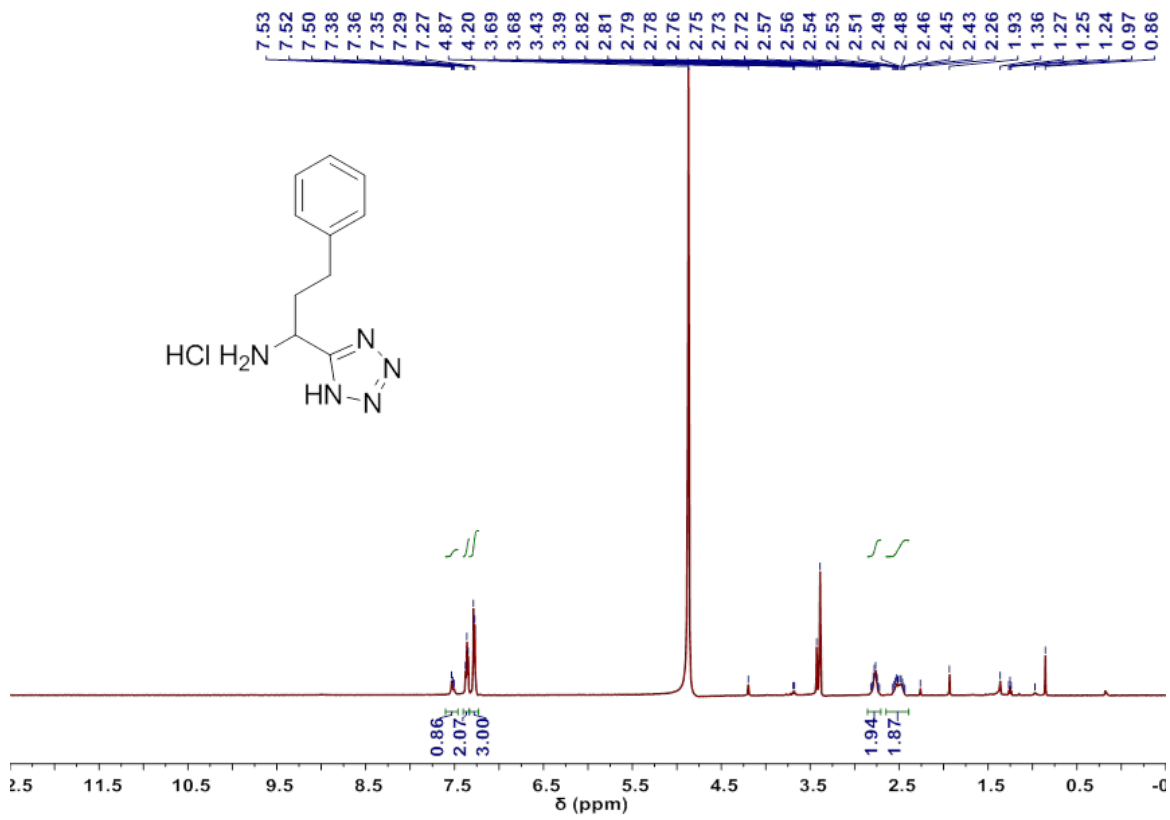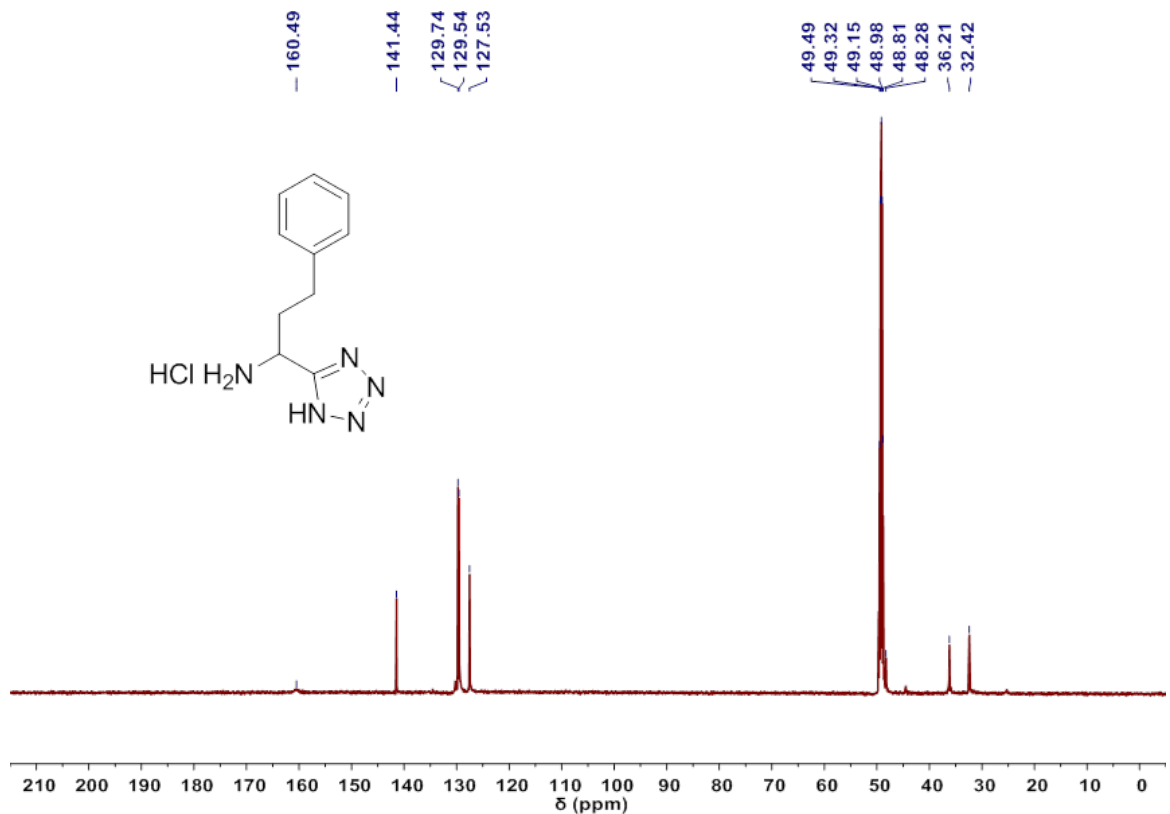

### 4-Amino-4-(1H-tetrazol-5-yl)butanamide (6m)

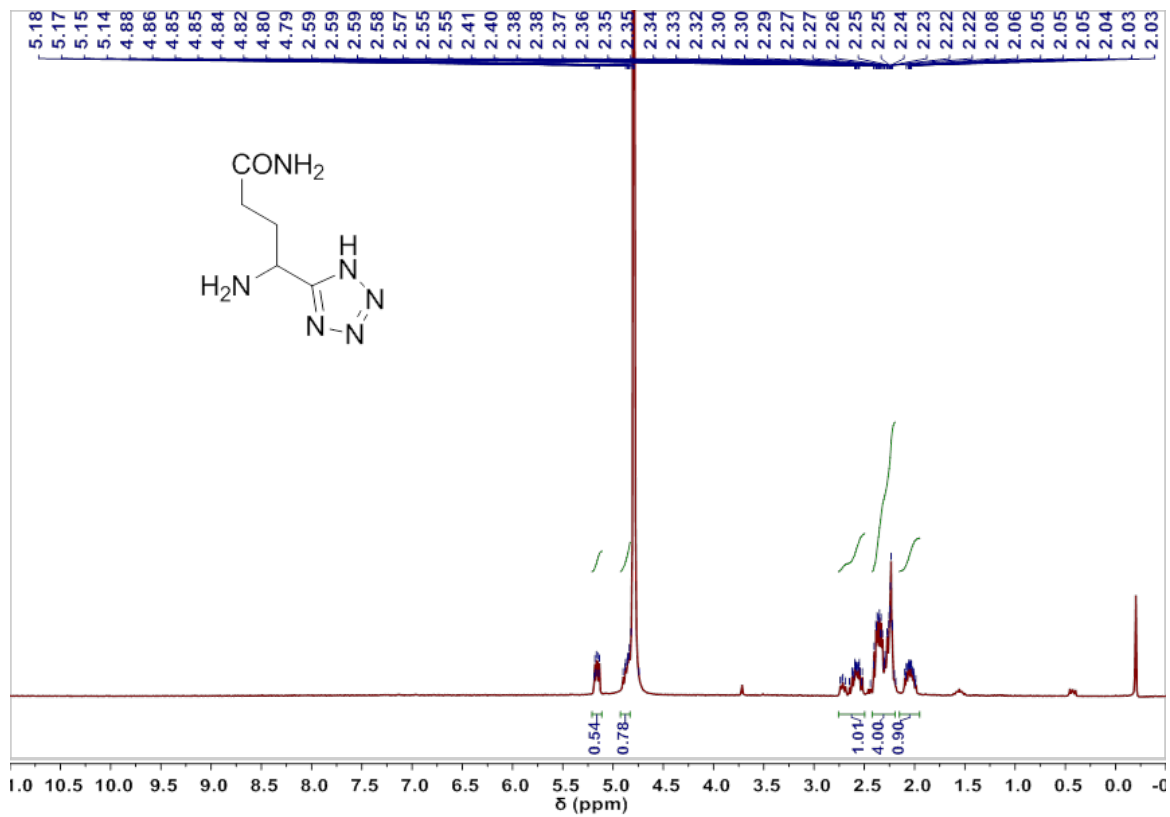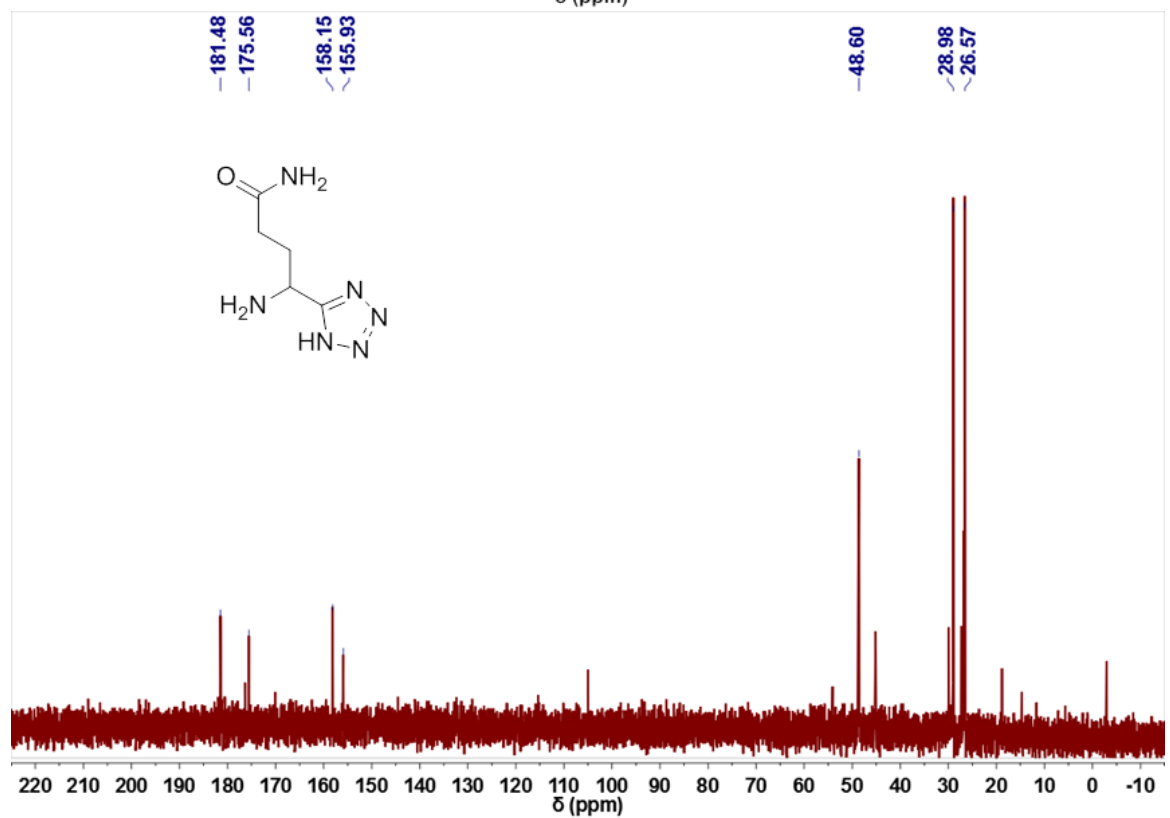



### 3-Amino-3-(1H-tetrazol-5-yl)propanoic acid (6n)

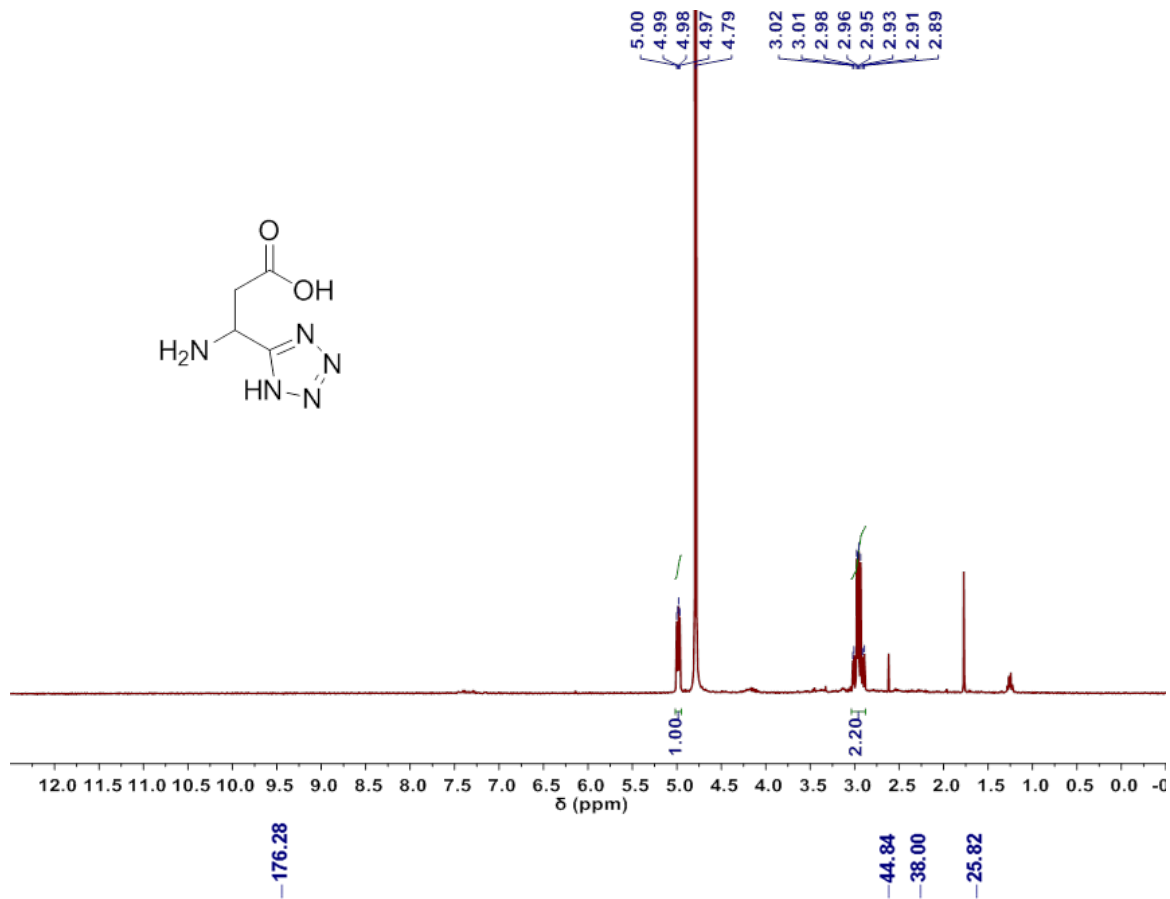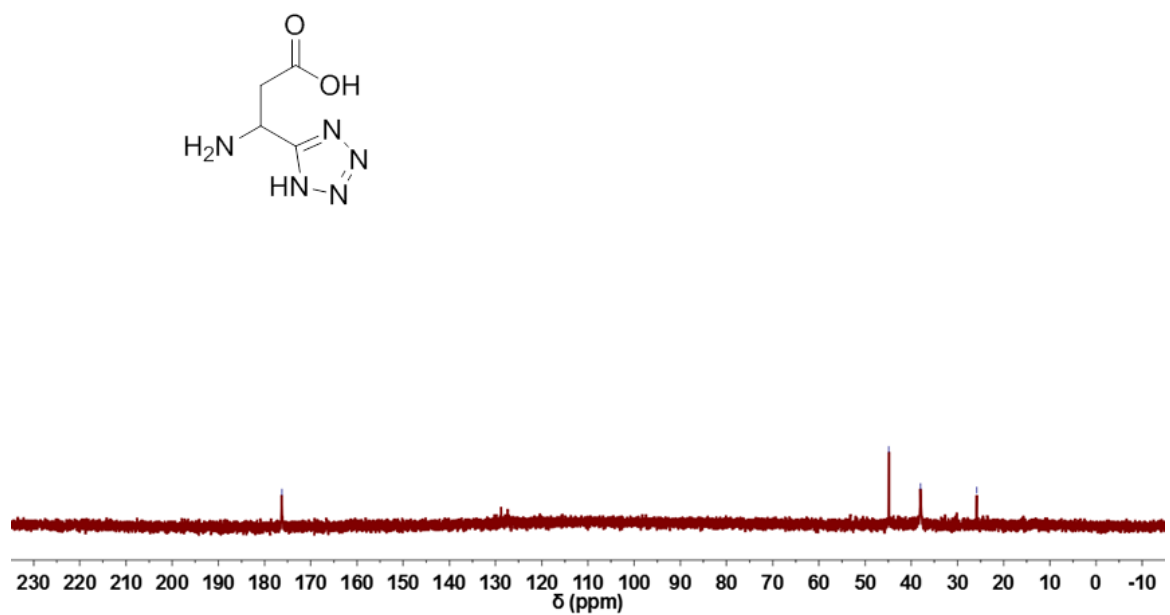

### 3-Amino-3-(1H-tetrazol-5-yl)propanamide (6o)

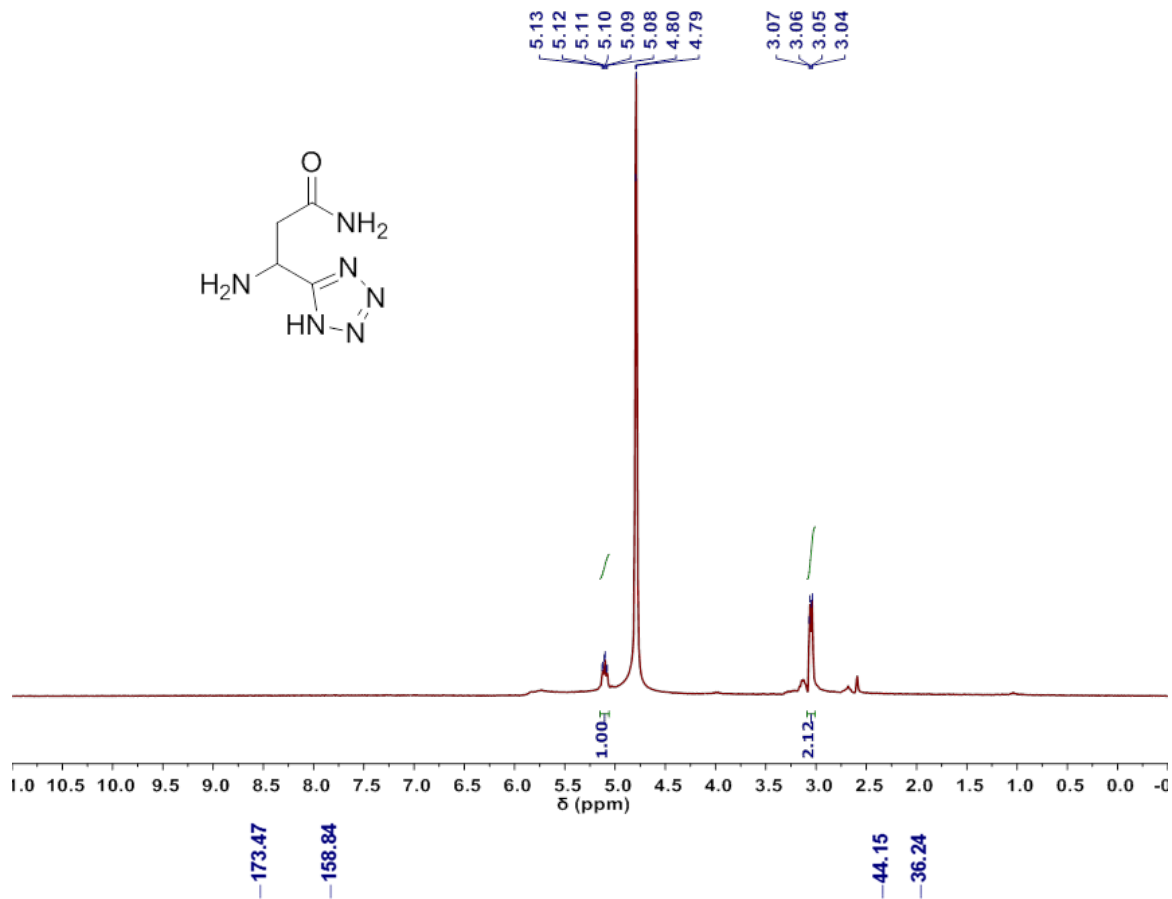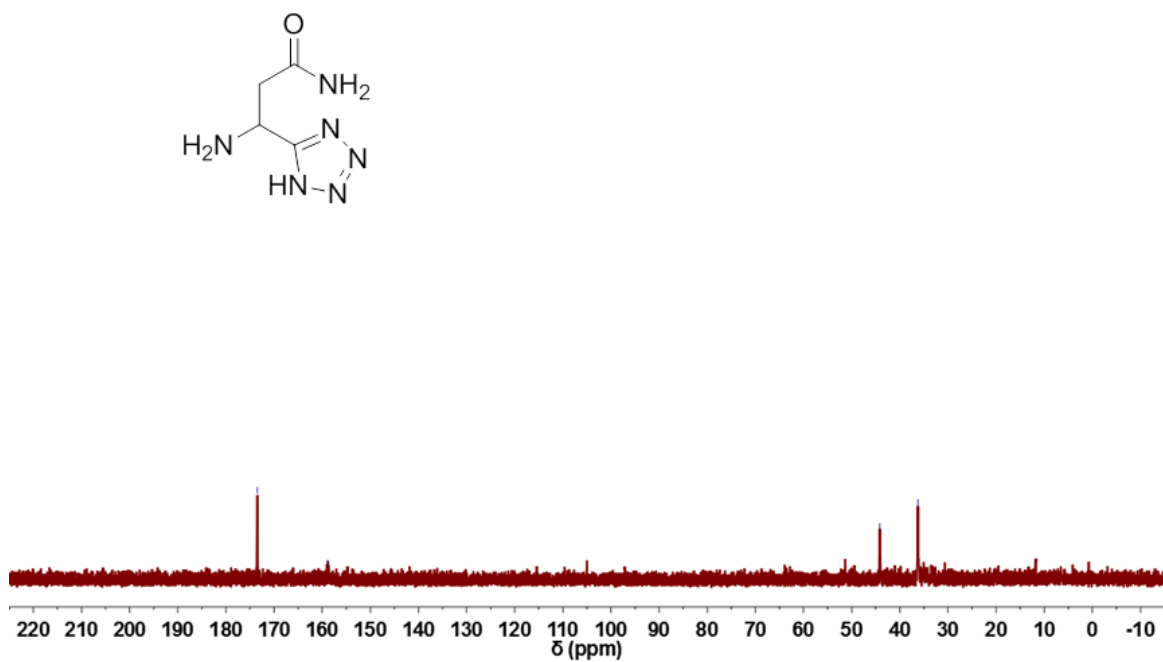

## 2-Amino-2-(1H-tetrazol-5-yl)ethanol (6p)

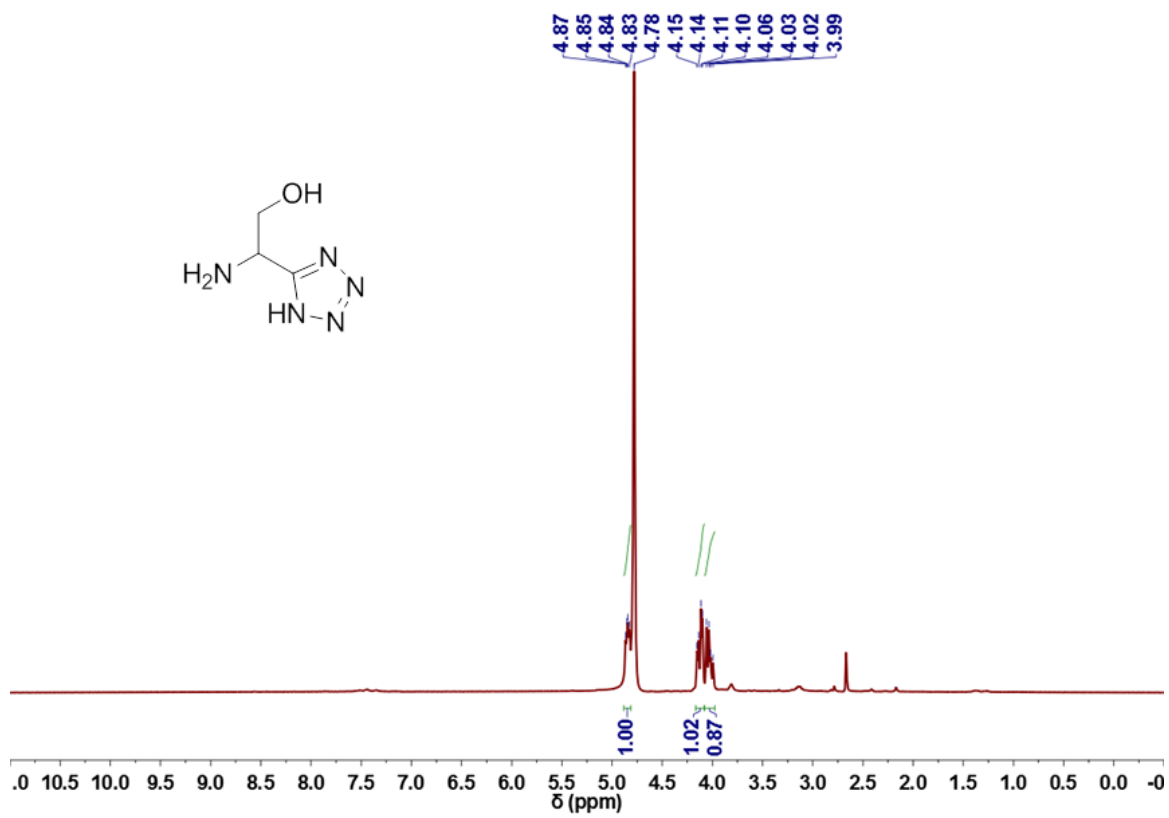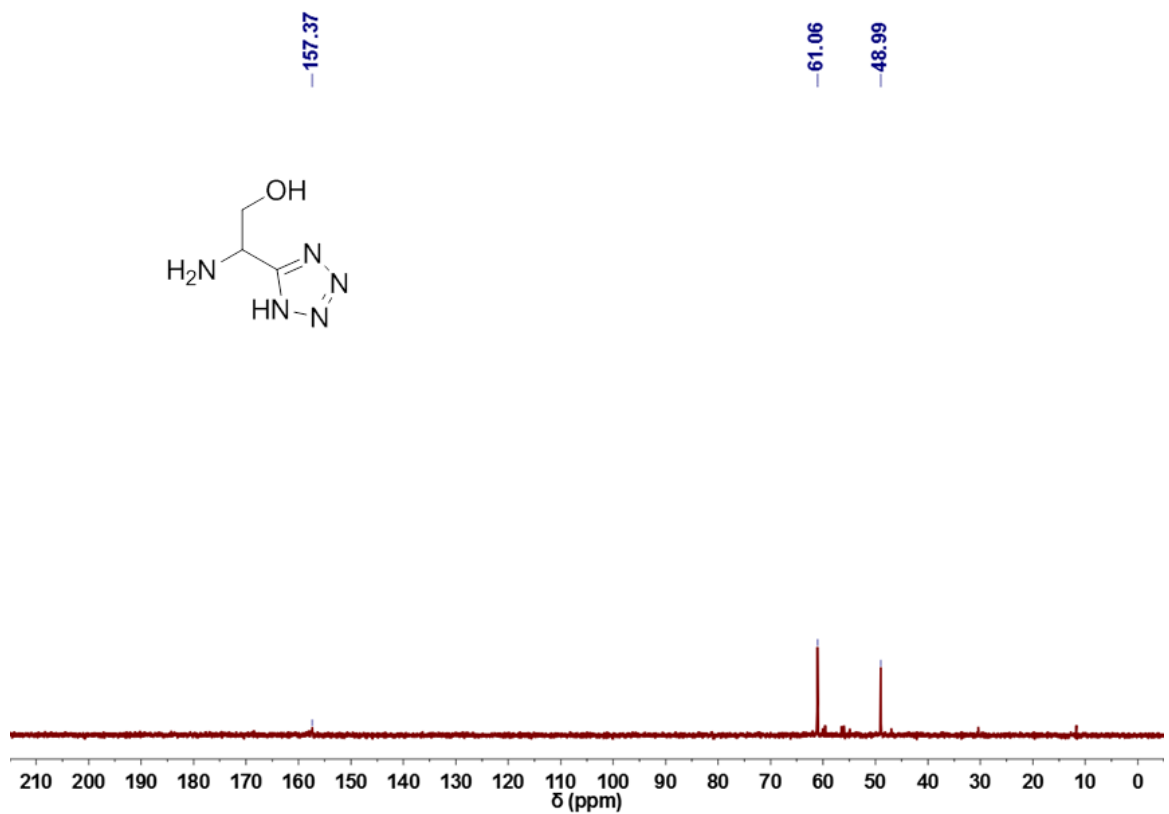

### 4-(2-Amino-2-(1H-tetrazol-5-yl)ethyl)phenol (6q)

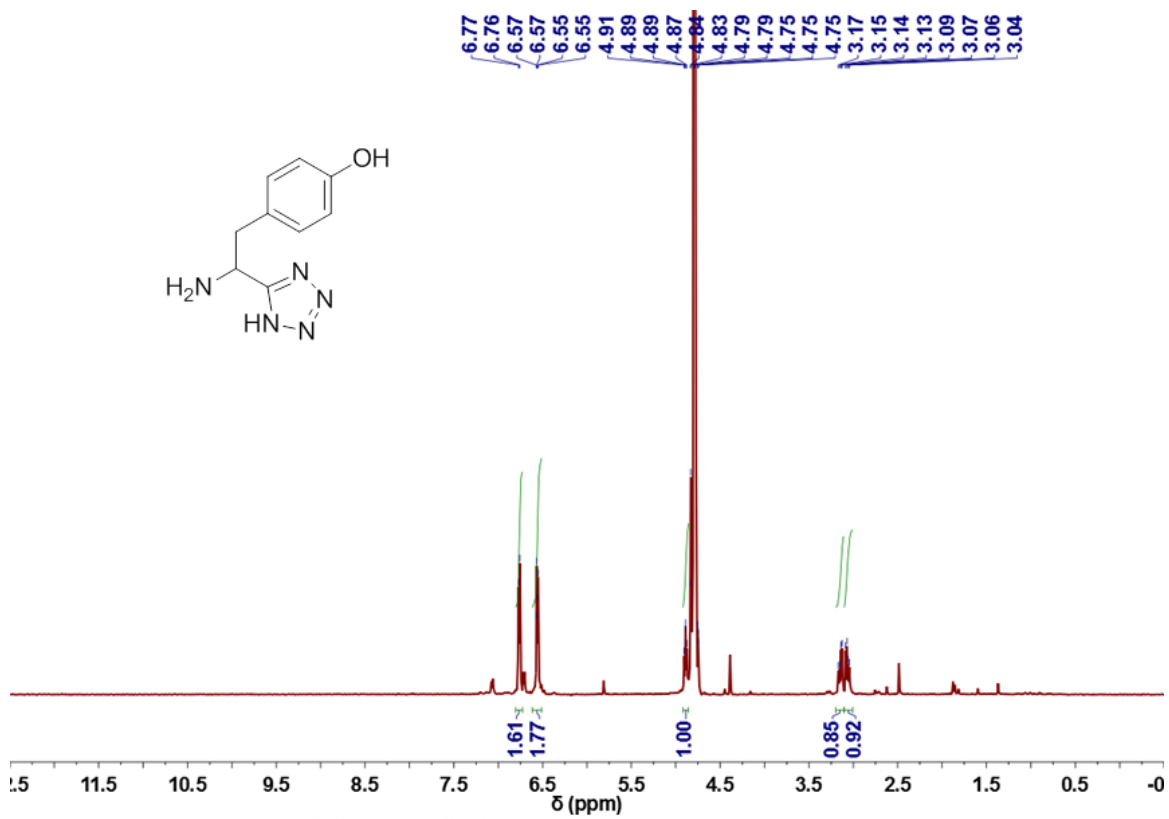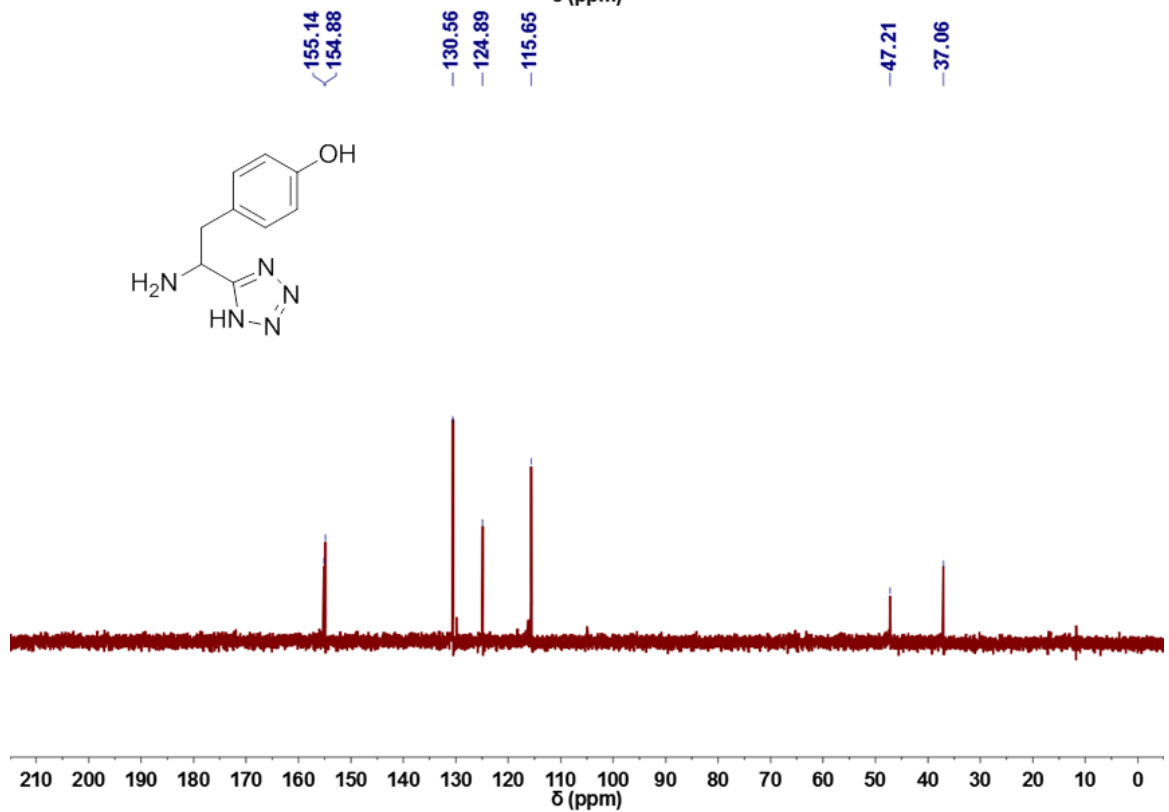

**Amino-1-(1H-tetrazol-5-yl)propan-2-ol (6r)**

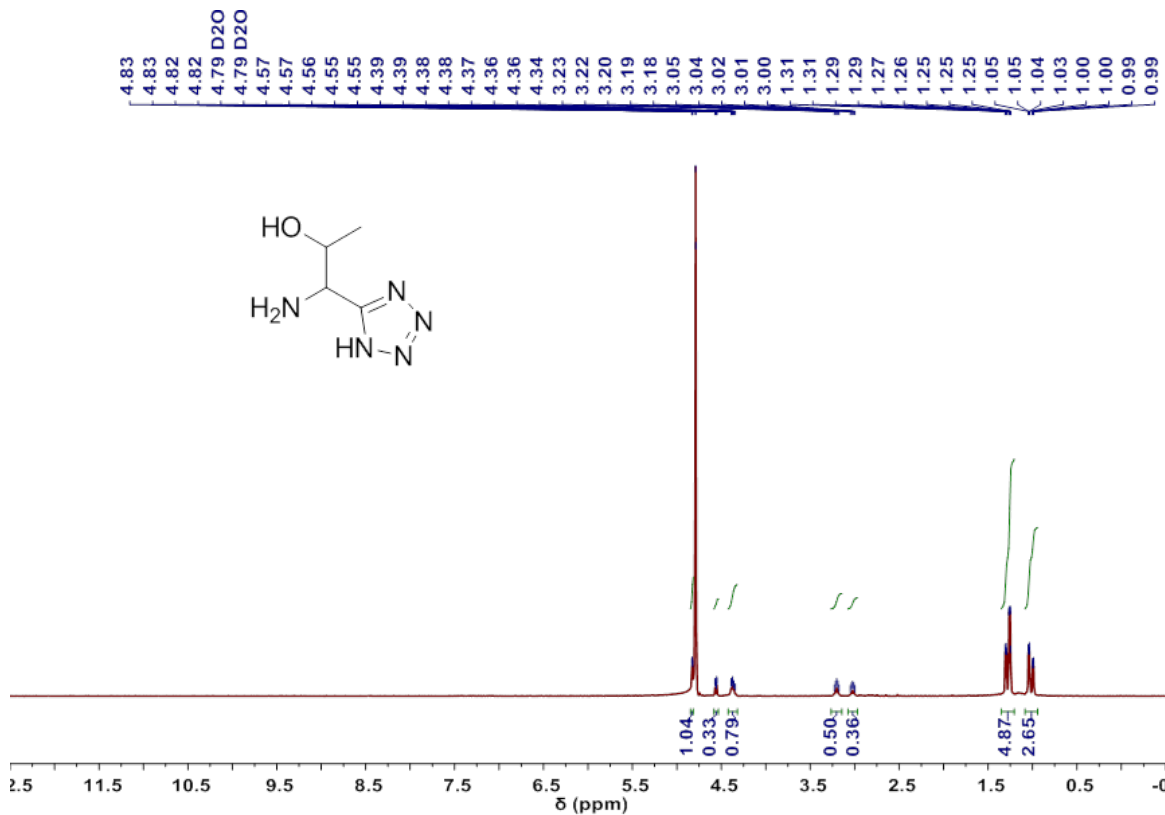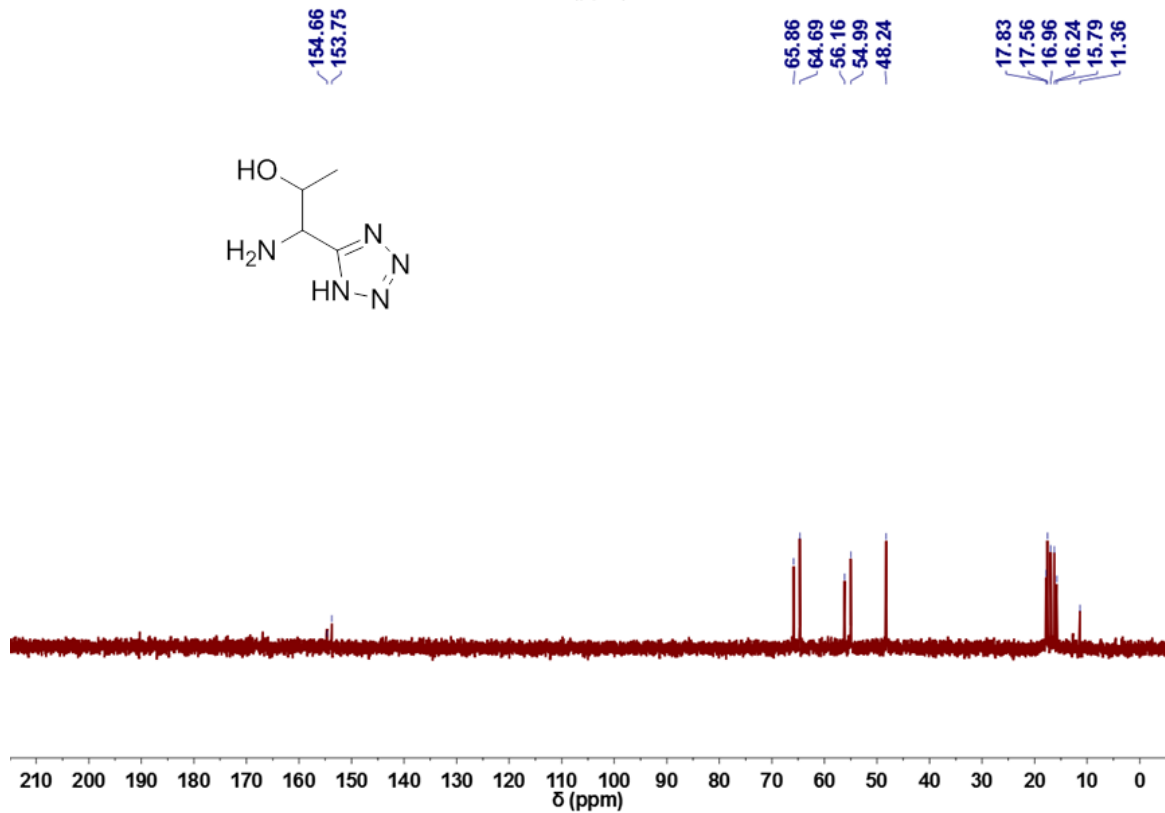

### 4-(2-Amino-2-(1H-tetrazol-5-yl)ethyl)phenol (6s)

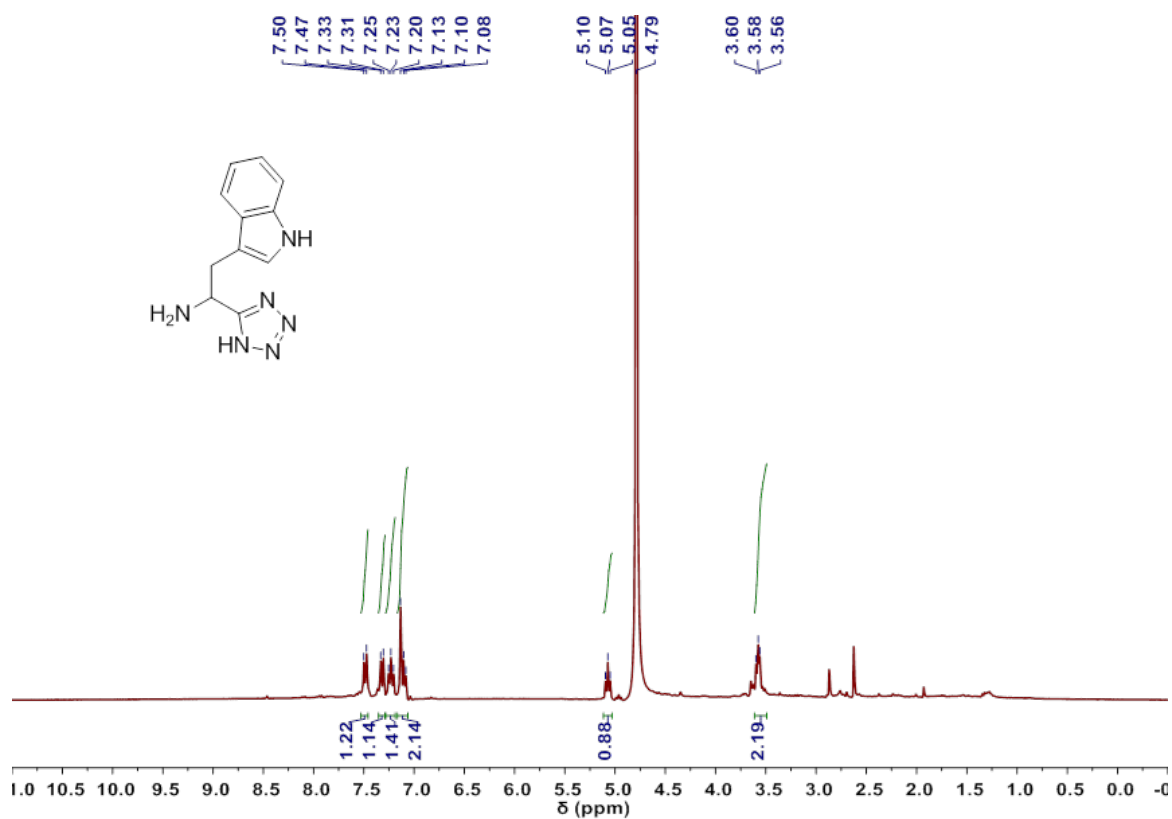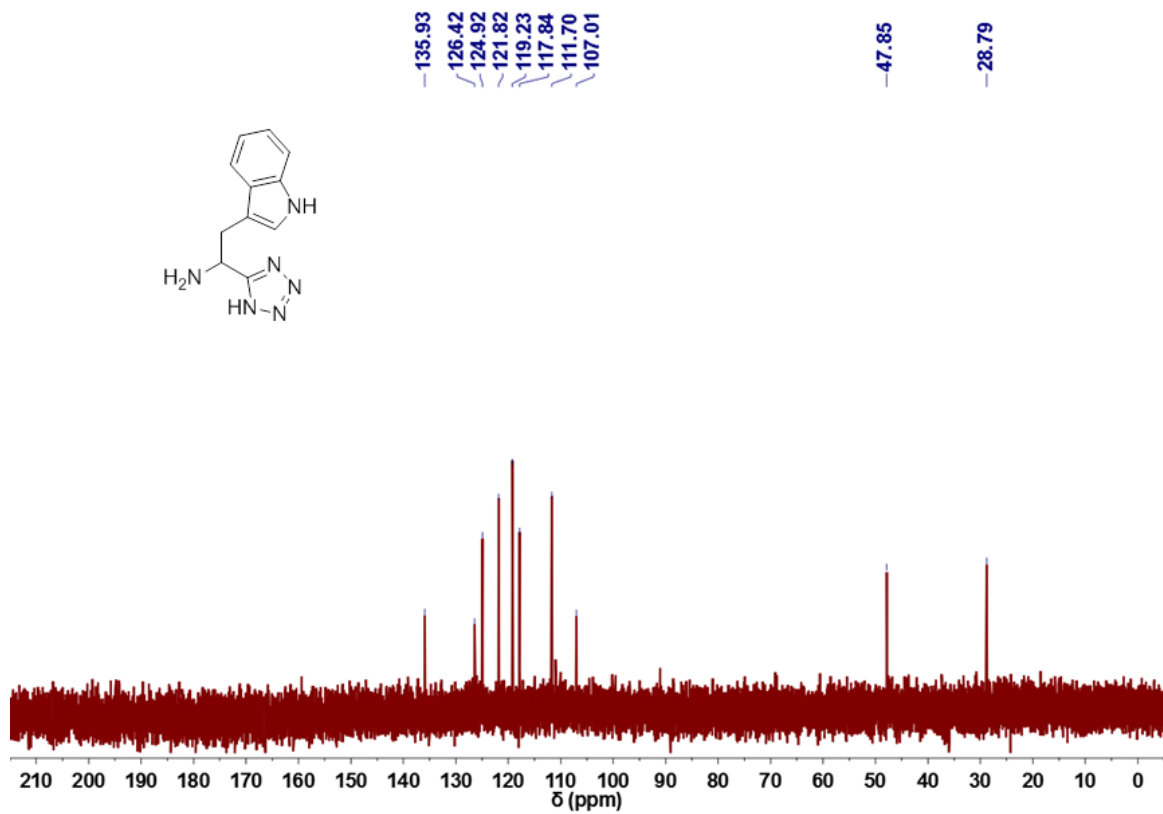

### 2-(1H-Imidazol-4-yl)-1-(1H-tetrazol-5-yl)ethanamine (6t)

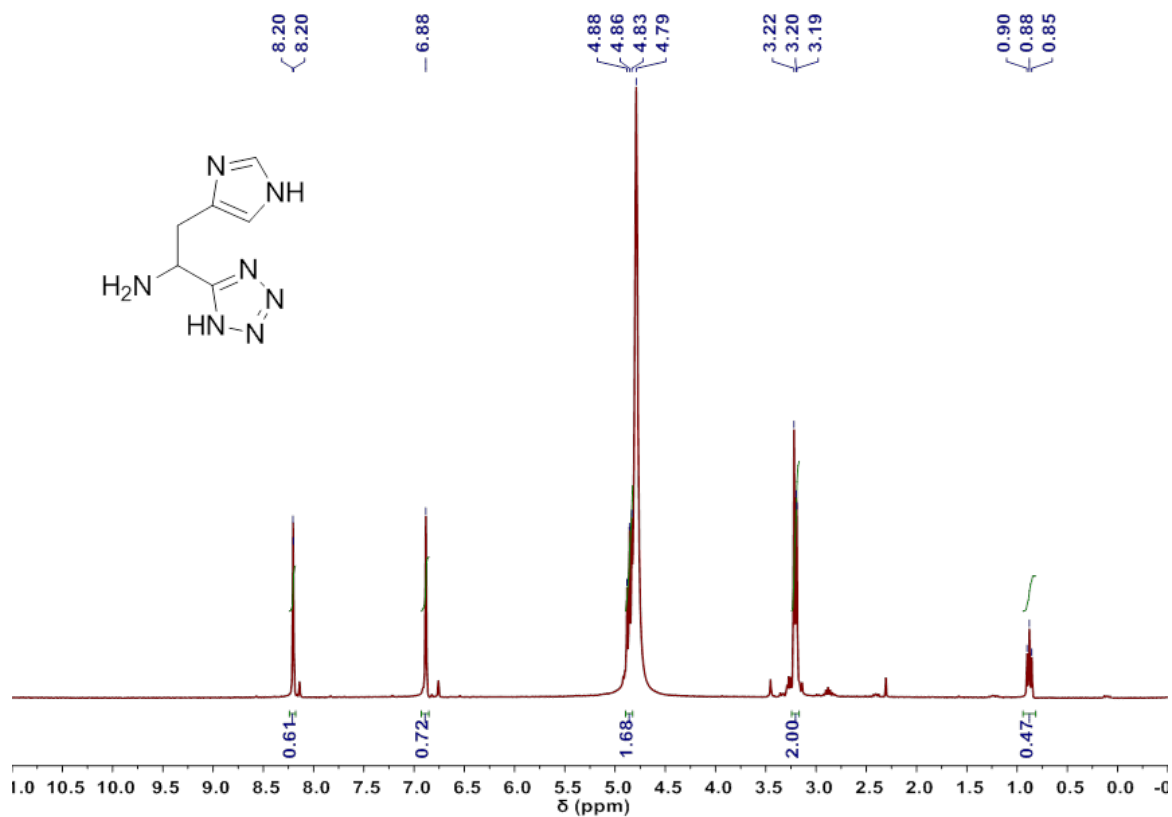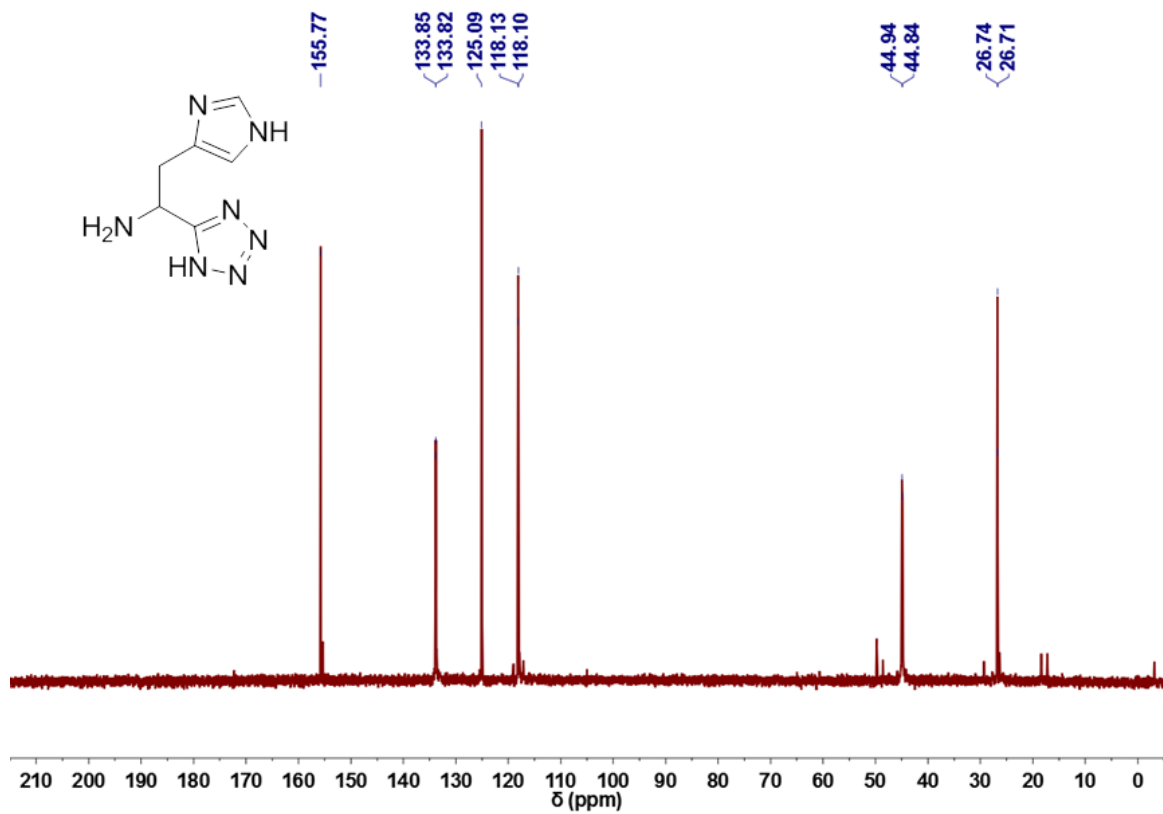

1-(4-Amino-4-(1H-tetrazol-5-yl)butyl)guanidine (6u)

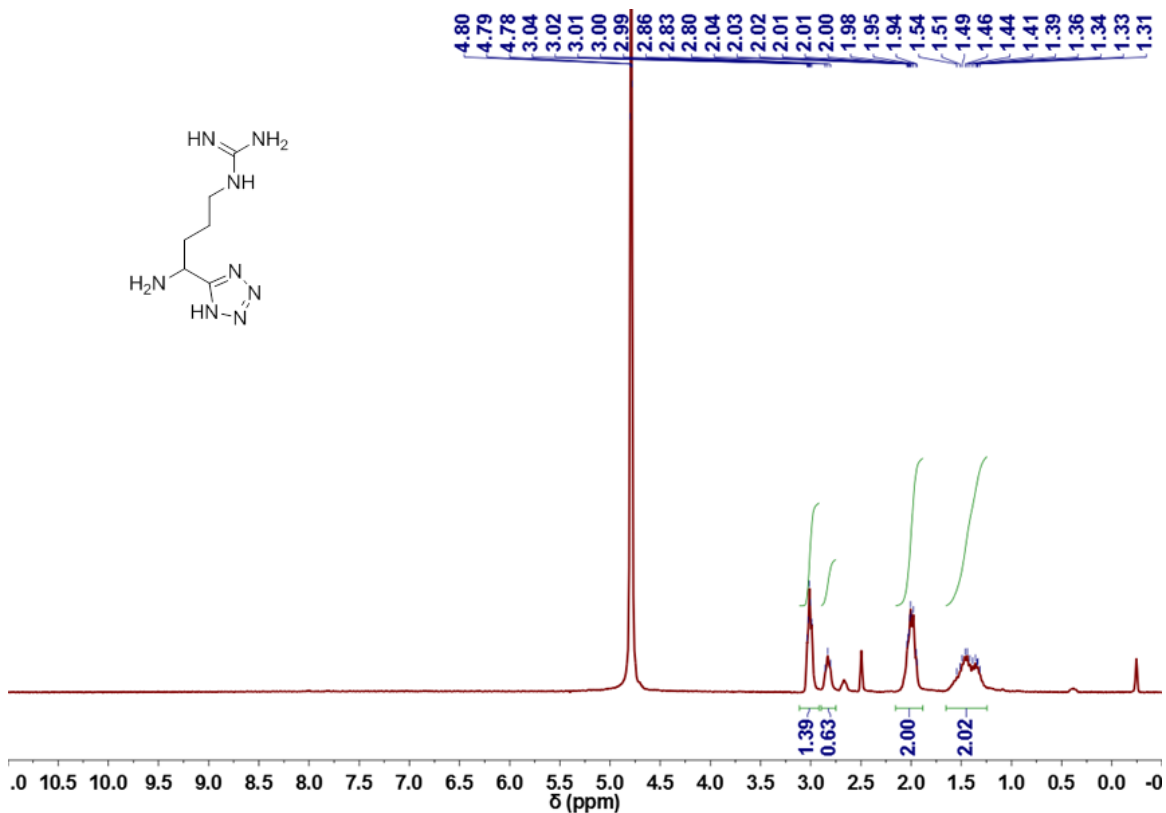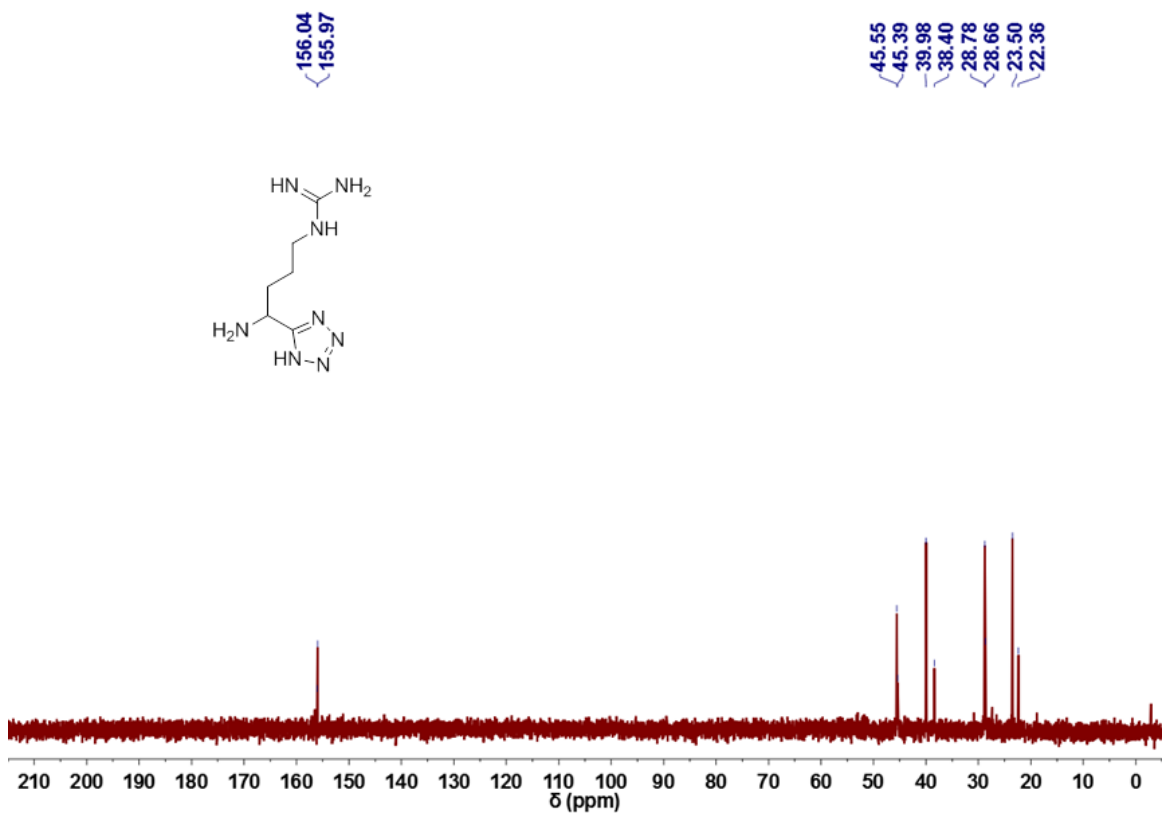



### 5-(Pyrrolidin-2-yl)-1H-tetrazole (6v)

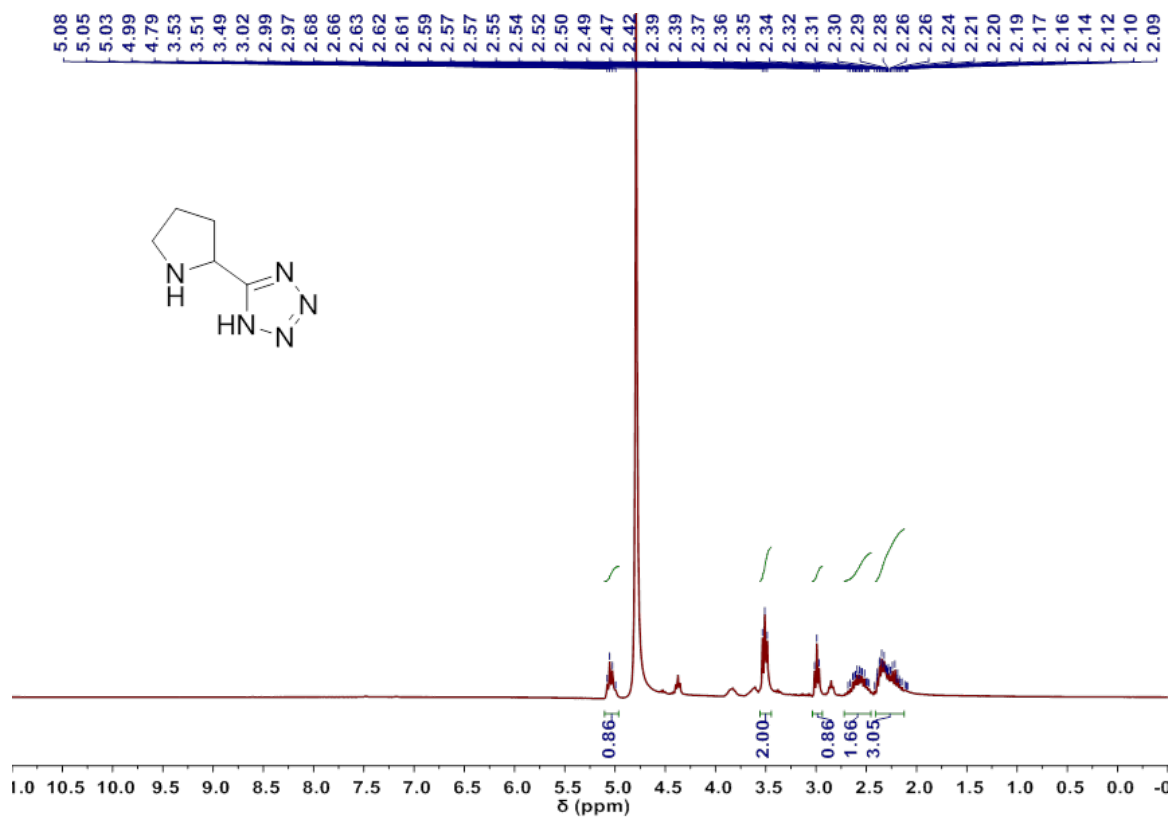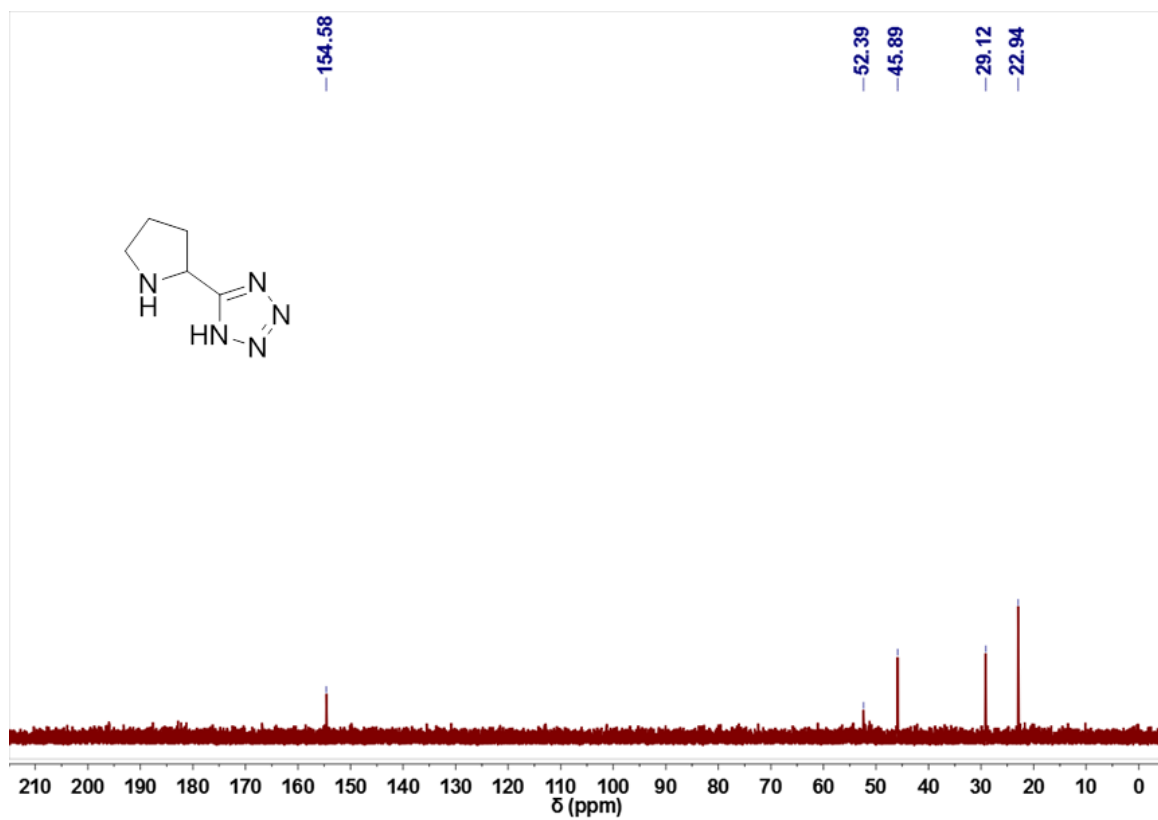

### 2-Amino-2-(1H-tetrazol-5-yl)ethanethiol (6w)

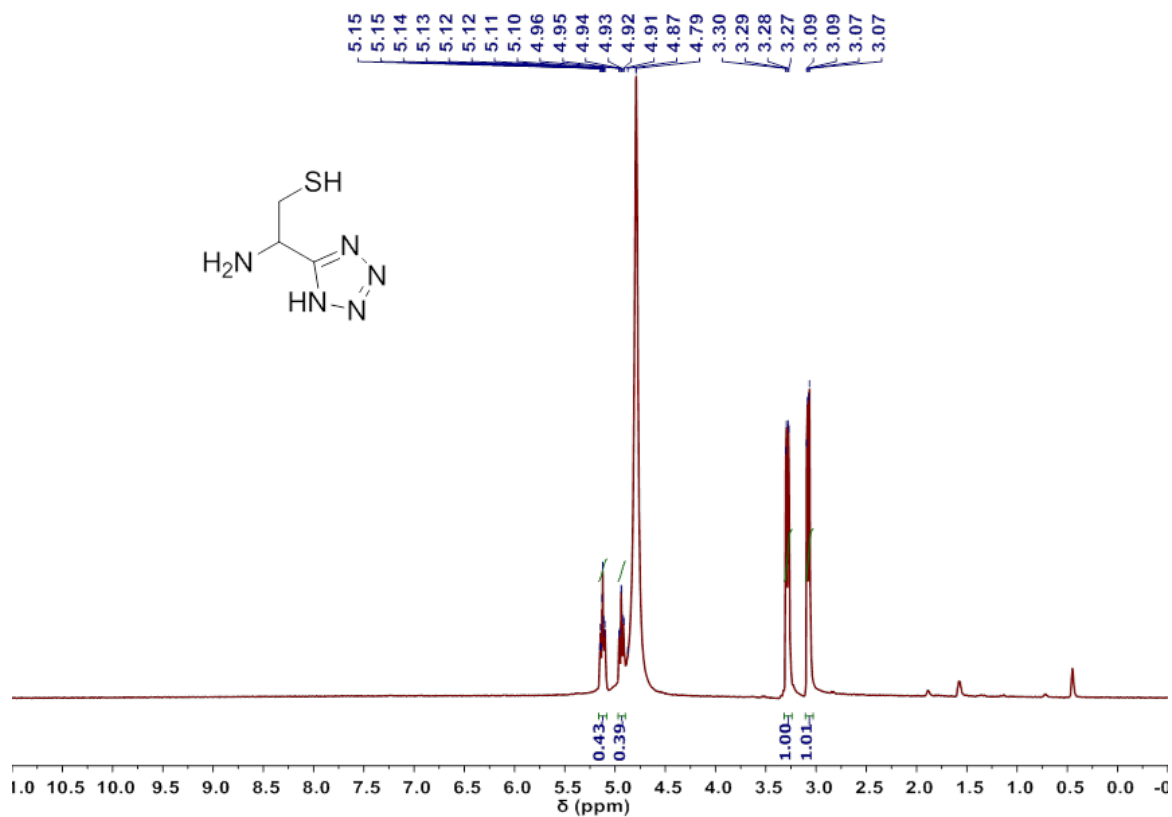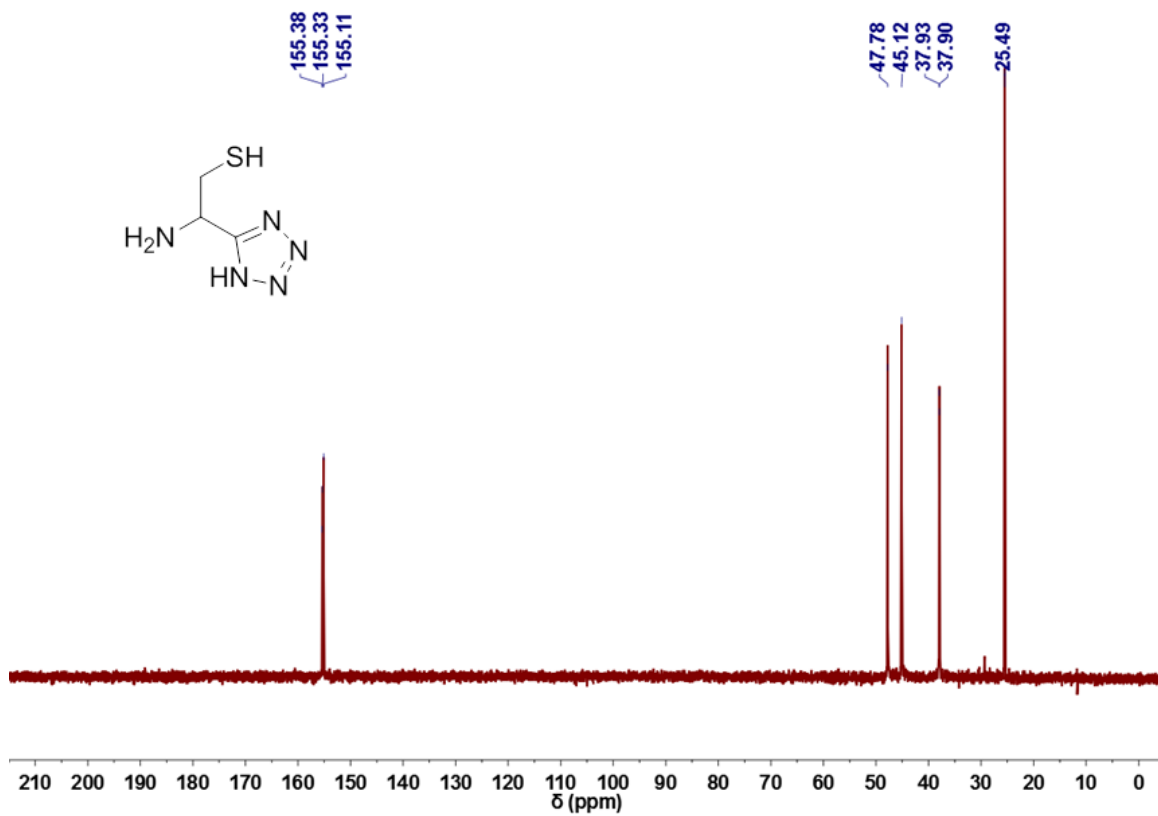

## 2-Amino-2-(1H-tetrazol-5-yl)ethanethiol (6x)

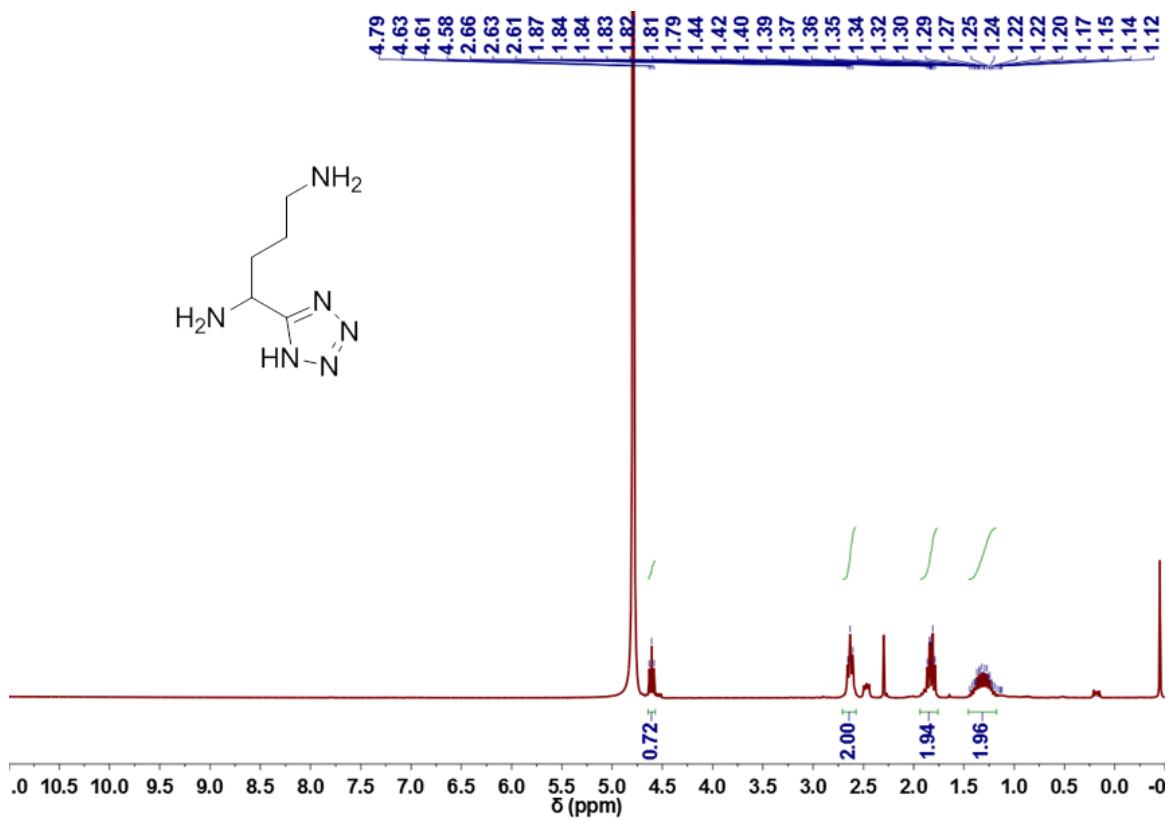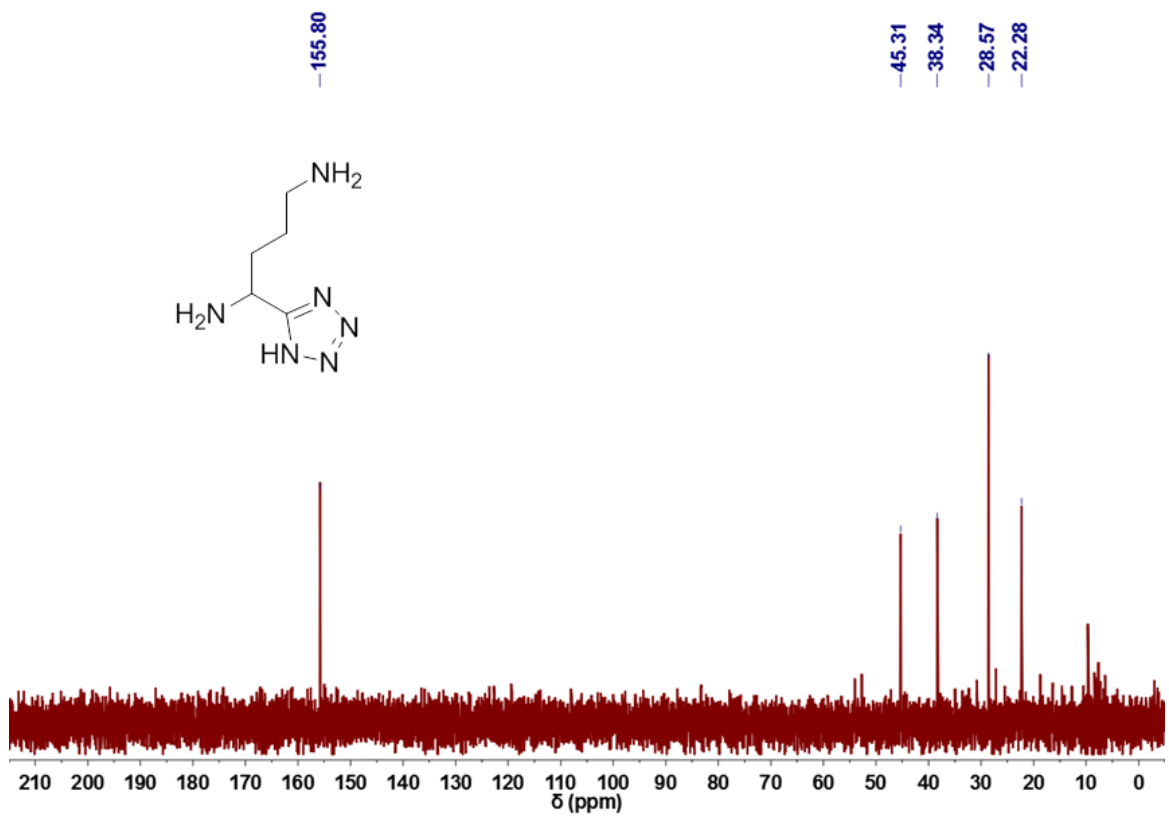

Ethyl 3-(tritylimino)propanoate (25)

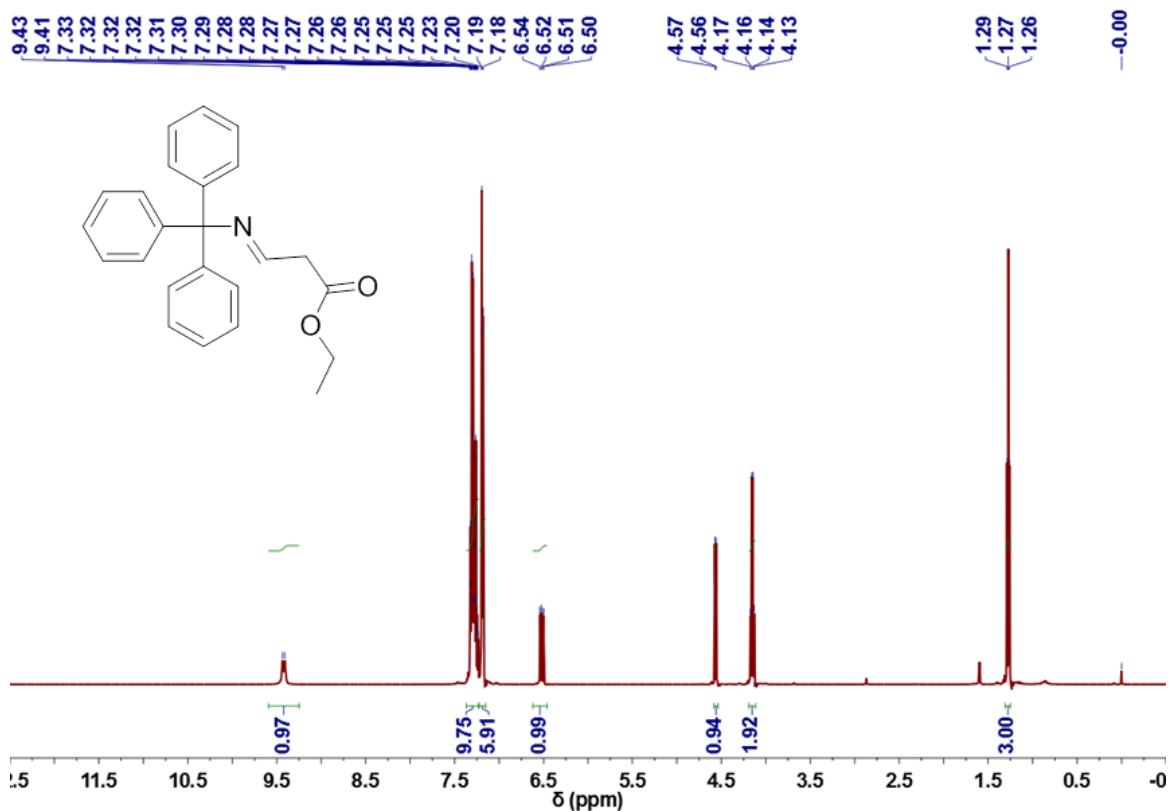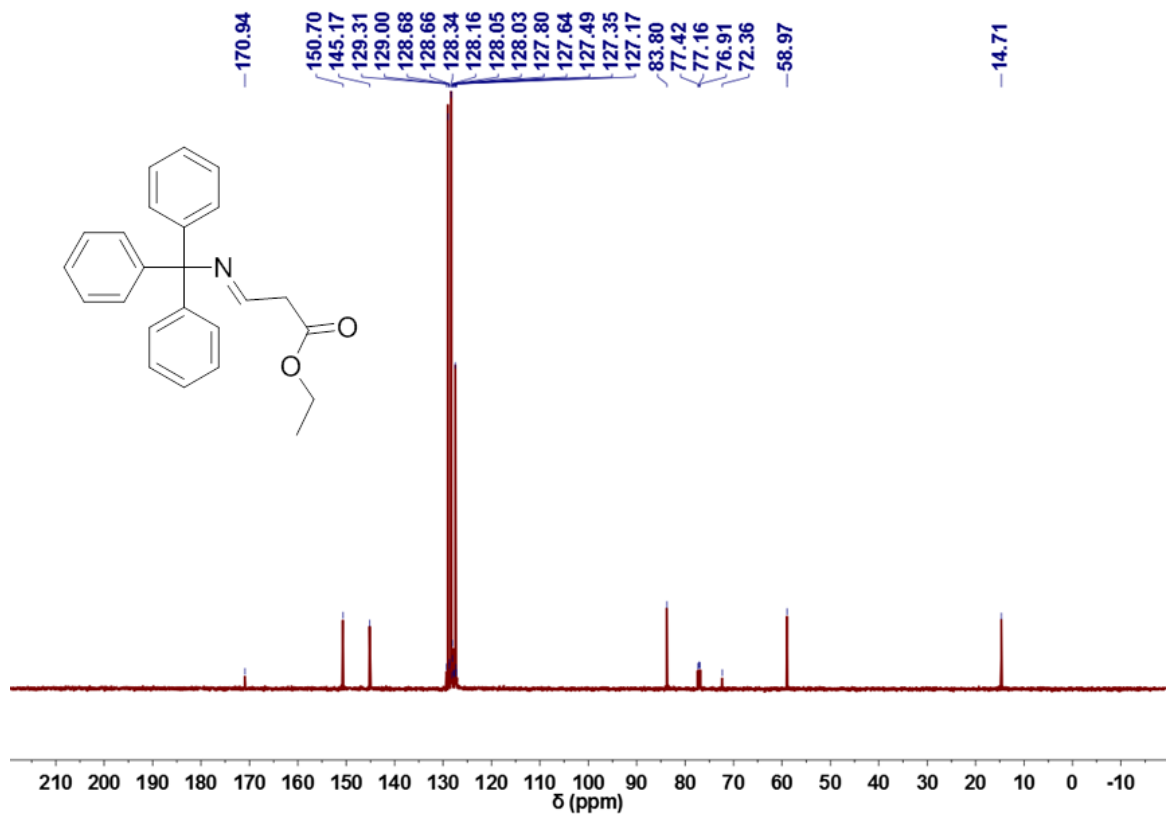

### 3. Single Crystal X-Ray Structure Determination of Compounds **5a** and **5j**

#### *Crystallographic data collection and structure refinement*

The good quality single crystals of compounds **5a** and **5j**, suitable for X-ray diffraction experiment, were selected after crystallization process and mounted on Micro Mounts<sup>TM</sup>. Intensity data were collected on the SuperNova diffractometer (*Rigaku - Oxford Diffraction*) equipped with Atlas detector and microfocus Mo K $\alpha$  ( $\lambda = 0.71073 \text{ \AA}$ ) radiation source at 120 K for crystals **5a** and **5j**. Data were processed using CRYSA LIS<sup>Pro</sup> [1]. The crystal data, details of data collection and structure refinement are summarized in Table 1.

The phase problem was solved with SUPERFILP [2]. Non-hydrogen atoms were refined anisotropically. All hydrogen atoms bonded to carbon atoms were included in the structure factor calculations at idealized positions and refined using riding model with the isotropic displacement parameter  $U_{\text{iso}}[\text{H}] = 1.2$  (or 1.5)  $U_{\text{eq}}[\text{C}]$ . The hydrogen atoms bounded to nitrogen or oxygen atoms were found on the difference Fourier map and refined with no restraints on displacement parameters. The structures were refined using weighted full-matrix least-squares on  $F^2$  by SHELXL program [3]. Calculations were performed using WinGX integrated system (ver. 2013.2) [4]. Structural description graphics were performed with program Mercury 3.5 [5]. A local disorder of *tert*-butyl group is observed for structure **5j**, where two methyl groups required refinement of the disorder, according to high positive density on the difference Fourier map. Two alternative positions of methyl groups C35 and C37 in **5j** were refined of ca. 77% and 23%, occupancy, whereas for atom C36 the position of the disordered methyl was not clearly indicated on the difference map.

Crystallographic data for structures presented in this paper have been deposited with the Cambridge Crystallographic Data Centre as supplementary publication: CCDC 1410965 (**5a**), CCDC 1410966 (**5j**). Copies of the data can be obtained, free of charge, on application to CCDC, 12 Union Road, Cambridge CB2 1EZ, UK, (fax: +44-(0)1223-336033 or e-mail: [deposit@ccdc.cam.ac.uk](mailto:deposit@ccdc.cam.ac.uk)).

**Table 1.** Crystal data and structure refinement results of compounds **5a** and **5j**.

|                                                            | <b>5a</b>                                                                                    | <b>5j</b>                                                                        |
|------------------------------------------------------------|----------------------------------------------------------------------------------------------|----------------------------------------------------------------------------------|
| Empirical moiety formula                                   | C <sub>29</sub> H <sub>35</sub> N <sub>5</sub>                                               | C <sub>32</sub> H <sub>39</sub> N <sub>5</sub>                                   |
| Formula weight [g/mol]                                     | 453.62                                                                                       | 493.68                                                                           |
| Temperature [K]                                            | 120.0 (1)                                                                                    | 120.0 (1)                                                                        |
| Wavelength [Å]                                             | 0.71073                                                                                      | 0.71073                                                                          |
| Crystal system                                             | Monoclinic                                                                                   | Orthorombic                                                                      |
| Space group                                                | P2 <sub>1</sub> /c                                                                           | Pbca                                                                             |
| Unit cell dimensions                                       | a = 8.8017(3) Å<br>b = 27.2931(8) Å<br>c = 11.1574(4) Å<br>α=90°<br>β= 107.933(4) °<br>γ=90° | a = 17.898(5) Å<br>b = 14.928(5) Å<br>c = 20.439(5) Å<br>α=90°<br>β=90°<br>γ=90° |
| Volume [Å <sup>3</sup> ]                                   | 2550.08(15)                                                                                  | 5461.00(3)                                                                       |
| Z                                                          | 4                                                                                            | 8                                                                                |
| D <sub>calc</sub> [Mg/m <sup>3</sup> ]                     | 1.182                                                                                        | 1.201                                                                            |
| μ [mm <sup>-1</sup> ]                                      | 0.071                                                                                        | 0.072                                                                            |
| F(000)                                                     | 976                                                                                          | 2128                                                                             |
| Crystal size [mm <sup>3</sup> ]                            | 0.4 x 0.4 x 0.2                                                                              | 0.6 x 0.5 x 0.5                                                                  |
| Θ range                                                    | 2.85° to 28.56°                                                                              | 2.95° to 28.61°                                                                  |
| Index ranges                                               | -10 ≤ h ≤ 11,<br>-34 ≤ k ≤ 34,<br>-13 ≤ l ≤ 13                                               | -15 ≤ h ≤ 23,<br>-15 ≤ k ≤ 20,<br>-26 ≤ l ≤ 24                                   |
| Refl. collected                                            | 13411                                                                                        | 26165                                                                            |
| Independent reflections                                    | 5246<br>[R(int) = 0.0245]                                                                    | 6487<br>[R(int) = 0.0360]                                                        |
| Completeness [%] to Θ                                      | 99.8 (Θ 26.3°)                                                                               | 99.7 (Θ 26.3°)                                                                   |
| Absorption correction                                      | Multi-scan                                                                                   | Multi-scan                                                                       |
| Max. and min. transmission                                 | 0.933 and 1.000                                                                              | 0.514 and 1.000                                                                  |
| Refinement method                                          | Full-matrix least-squares on F <sup>2</sup>                                                  | Full-matrix least-squares on F <sup>2</sup>                                      |
| Data/ restraints/parameters                                | 5246 / 0 / 317                                                                               | 6487 / 4 / 357                                                                   |
| Goof on F <sup>2</sup>                                     | 1.034                                                                                        | 1.030                                                                            |
| Final R indices [I>2σ(I)]                                  | R1= 0.0417, wR2= 0.0946                                                                      | R1= 0.0499, wR2= 0.1127                                                          |
| R indices (all data)                                       | R1= 0.0538, wR2= 0.1021                                                                      | R1= 0.0663, wR2= 0.1242                                                          |
| Δρ <sub>max</sub> , Δρ <sub>min</sub> [e·Å <sup>-3</sup> ] | 0.27 and -0.19                                                                               | 0.41 and -0.59                                                                   |

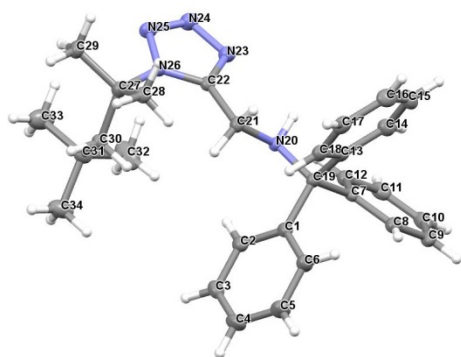

**5a**

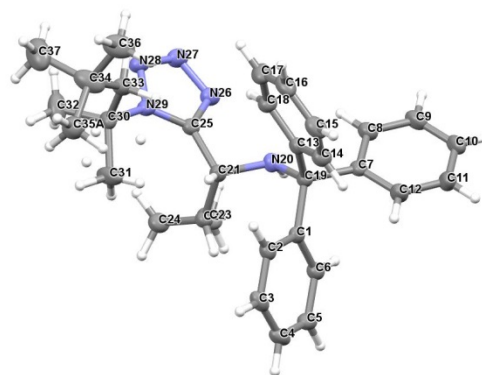

**5j**

**Figure 1.** A view of a molecule of compounds **5a** and **5j** in the crystal structure, showing the numbering scheme was employed. For the crystal structure of compound **5j**, the more abundant conformer is presented. Anisotropic atomic displacement ellipsoids for the non-hydrogen atoms are shown at the 50 % probability level and hydrogen atoms are displayed as spheres of arbitrary radius.

### *Acknowledgements*

The research was carried out with the equipment purchased thanks to the financial support of the European Regional Development Fund in the framework of the Polish Innovation Economy Operational Program (contract no. POIG.02.01.00-12-023/08).

### *References*

- [1] Oxford Diffraction (2006). CrysAlisPro Oxford Diffraction Ltd, Abingdon, England, Version 1.171.36.20 (release 27-06-2012 CrysAlis171.NET)
- [2] Palatinus, L. Chapuis, G., *J. Appl. Cryst.* 2007, 40, 786.
- [3] Sheldrick, G. M. *Acta Cryst.* 2008, A64, 112-122.
- [4] Farrugia, L., *J. J. Appl. Cryst.* 1999, 32, 837-838.
- [5] Macrae, C. F., Edgington, P.R., McCabe, P., Pidcock, E., Shields G.P., Taylor, R., Towler, M., & van de Streek J., *J. Appl. Cryst.* 2006, 39, 453-457.

## 4. Single Crystal X-Ray Structure Determination of Compound **5I**

### *Crystallographic data collection and structure refinement*

Data were collected on an X-ray single crystal diffractometer equipped with a CCD detector (Bruker APEX II,  $\kappa$ -CCD), a fine-focus sealed tube (Bruker AXS, D8) (**5I**) with MoK $\alpha$  radiation ( $\lambda = 0.71073 \text{ \AA}$ ), and a graphite monochromator by using the SMART software package [1]. The measurements were performed on a single crystal coated with perfluorinated ether. The crystal was fixed on the top of a cactus prickle (*Opuntia ficusindia*) and transferred to the diffractometer. The crystal was frozen under a stream of cold nitrogen. A matrix scan was used to determine the initial lattice parameters. Reflections were merged and corrected for Lorenz and polarization effects, scan speed, and background using SAINT [2]. Absorption corrections, including odd and even ordered spherical harmonics were performed using SADABS [2]. Space group assignments were based upon systematic absences, E statistics, and successful refinement of the structure. The structure was solved by direct methods with the aid of successive difference Fourier maps, and were refined against all data using WinGX [7] based on SIR-92 [3] in conjunction with SHELXL-97 [5]. Unless otherwise noticed non-hydrogen atoms were refined with anisotropic displacement parameters. All hydrogen atoms could be located in the difference Fourier maps and were allowed to refine freely. Full-matrix least-squares refinements were carried out by minimizing  $\Sigma w(F_o^2 - F_c^2)^2$  with SHELXL-97 [5] weighting scheme. Neutral atom scattering factors for all atoms and anomalous dispersion corrections for the non-hydrogen atoms were taken from International Tables for Crystallography [4]. Images of the crystal structures were generated by PLATON [6]. CCDC 111111 (**5I**) contains the supplementary crystallographic data for this compound. This data can be obtained free of charge from The Cambridge Crystallographic Data Centre via [www.ccdc.cam.ac.uk/data\\_request/cif](http://www.ccdc.cam.ac.uk/data_request/cif) or via [https://www.ccdc.cam.ac.uk/services/structure\\_deposit/](https://www.ccdc.cam.ac.uk/services/structure_deposit/)

**5I:** Full refinement was possible without running into problems.



## Compound 5l

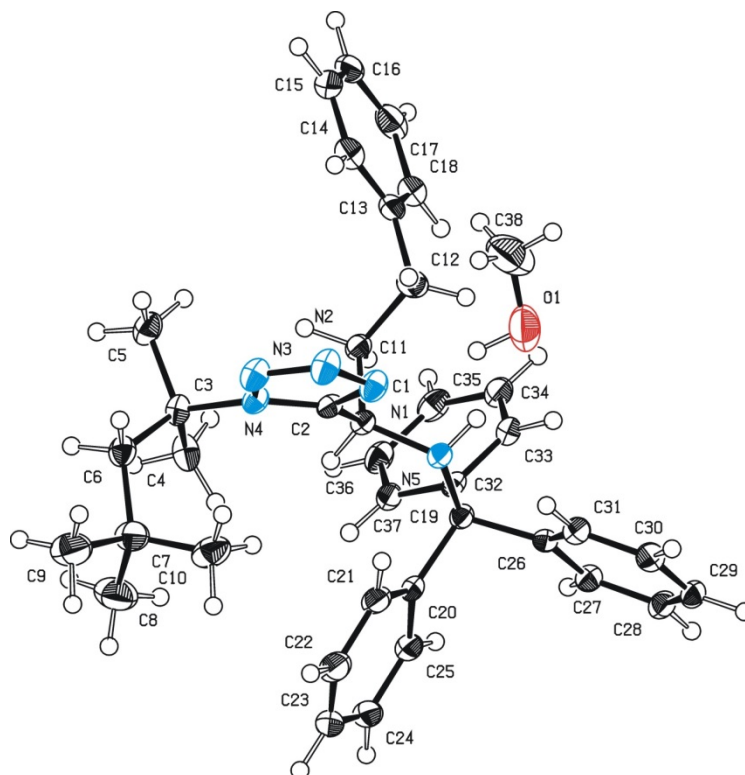

**Figure 2.** Ortep drawing of compound **5l** with 50% ellipsoids [6].

|                       |                                                                                                                                                                                                                                                                                                                                                    |                                    |                |
|-----------------------|----------------------------------------------------------------------------------------------------------------------------------------------------------------------------------------------------------------------------------------------------------------------------------------------------------------------------------------------------|------------------------------------|----------------|
| Operator:             | *** Herdtweck ***                                                                                                                                                                                                                                                                                                                                  |                                    |                |
| Molecular Formula:    | C <sub>38</sub> H <sub>47</sub> N <sub>5</sub> O<br>(C <sub>37</sub> H <sub>43</sub> N <sub>5</sub> ), (C H <sub>4</sub> O)                                                                                                                                                                                                                        |                                    |                |
| Crystal Color / Shape | Colorless fragment                                                                                                                                                                                                                                                                                                                                 |                                    |                |
| Crystal Size          | Approximate size of crystal fragment used for data collection:<br>0.20 × 0.46 × 0.46 mm                                                                                                                                                                                                                                                            |                                    |                |
| Molecular Weight:     | 589.81 a.m.u.                                                                                                                                                                                                                                                                                                                                      |                                    |                |
| F <sub>000</sub> :    | 1272                                                                                                                                                                                                                                                                                                                                               |                                    |                |
| Systematic Absences:  | h0l: h+l≠2n; 0k0: k≠2n                                                                                                                                                                                                                                                                                                                             |                                    |                |
| Space Group:          | Monoclinic                                                                                                                                                                                                                                                                                                                                         | <i>P</i> 2 <sub>1</sub> / <i>n</i> | (I.T.-No.: 14) |
| Cell Constants:       | Least-squares refinement of 9870 reflections with the programs<br>"APEX suite" and "SAINT" [1,2]; theta range 1.83° < θ < 25.37°;<br>Mo(Kα <sup>-</sup> ); λ = 0.71073 Å<br>a = 12.5284(4) Å<br>b = 22.2553(7) Å      β = 107.6692(9)°<br>c = 12.7401(4) Å<br>V = 3384.66(19) Å <sup>3</sup> ; Z = 4; D <sub>calc</sub> = 1.158 g cm <sup>-3</sup> |                                    |                |
| Diffractometer:       | Kappa APEX II (Area Diffraction System; BRUKER AXS); sealed<br>tube; graphite monochromator; 50 kV; 30 mA; λ = 0.71073 Å; Mo(K<br>α <sup>-</sup> )                                                                                                                                                                                                 |                                    |                |
| Temperature:          | (-150±1) °C;                                                                                                                                                                                                                                                                                                                                       | (123±1) K                          |                |

Measurement Range:  $1.83^\circ < \theta < 25.37^\circ$ ; h: -15/15, k: -26/26, l: -15/15  
 Measurement Time:  $2 \times 7.50$  s per film  
 Measurement Mode: measured: 6 runs; 3249 films / scaled: 6 runs; 3249 films  
 $\varphi$ - and  $\omega$ -movement; Increment:  $\Delta\varphi/\Delta\omega = 0.50^\circ$ ; dx = 45.0 mm  
 LP - Correction: Yes [2]  
 Intensity Correction: No/Yes; during scaling [2]  
 Absorption Correction: Multi-scan; during scaling;  $\mu = 0.071 \text{ mm}^{-1}$  [2]  
 Correction Factors:  $T_{\min} = 0.6898$   $T_{\max} = 0.7452$   
 Reflection Data: 69991 reflections were integrated and scaled  
 1215 reflections systematic absent and rejected  
 68776 reflections to be merged  
 6206 independent reflections  
 0.020  $R_{\text{int}}$ : (basis  $F_o^2$ )  
 6206 independent reflections (all) were used in refinements  
 5558 independent reflections with  $I_o > 2\sigma(I_o)$   
 99.9 % completeness of the data set  
 585 parameter full-matrix refinement  
 10.6 reflections per parameter  
 Solution: Direct Methods [3, 7]; Difference Fourier syntheses  
 Refinement Parameters: In the asymmetric unit:  
 44 Non-hydrogen atoms with anisotropic displacement parameters  
 47 Hydrogen atoms with isotropic displacement parameters  
 Hydrogen Atoms: All hydrogen atom positions were found in the difference map calculated from the model containing all non-hydrogen atoms. The hydrogen positions were refined with individual isotropic displacement parameters.  
 Atomic Form Factors: For neutral atoms and anomalous dispersion [4, 5, 7]  
 Extinction Correction: no  
 Weighting Scheme:  $w^{-1} = \sigma^2(F_o^2) + (a*P)^2 + b*P$   
 with a: 0.0411; b: 1.1344; P: [Maximum(0 or  $F_o^2$ ) +  $2*F_c^2$ ]/3  
 Shift/Err: Less than 0.001 in the last cycle of refinement  
 Resid. Electron Density:  $+0.21 \text{ e}_0^-/\text{\AA}^3$ ;  $-0.21 \text{ e}_0^-/\text{\AA}^3$   
 R1:  $\Sigma(|F_o| - |F_c|) / \Sigma|F_o|$   
 [ $F_o > 4\sigma(F_o)$ ; N=5558]: = 0.0344  
 [all reflctns; N=6206]: = 0.0390  
 wR2:  $[\Sigma w(F_o^2 - F_c^2)^2 / \Sigma w(F_o^2)^2]^{1/2}$   
 [ $F_o > 4\sigma(F_o)$ ; N=5558]: = 0.0837  
 [all reflctns; N=6206]: = 0.0874  
 Goodness of fit:  $[\Sigma w(F_o^2 - F_c^2)^2 / (\text{NO} - \text{NV})]^{1/2}$  = 1.026  
 Remarks: Refinement expression  $\Sigma w(F_o^2 - F_c^2)^2$

## **References**

- [1] APEX suite of crystallographic software. APEX 2 Version 2008.4. Bruker AXS Inc., Madison, Wisconsin, USA (2008).
- [2] SAINT, Version 7.56a and SADABS Version 2008/1. Bruker AXS Inc., Madison, Wisconsin, USA (2008).
- [3] Altomare, A.; Cascarano, G.; Giacovazzo, C.; Guagliardi, A.; Burla, M. C.; Polidori, G.; Camalli M. "**SIR92**", *J. Appl. Cryst.* **1994**, 27, 435-436.
- [4] International Tables for Crystallography, Vol. C, Tables 6.1.1.4 (pp. 500-502), 4.2.6.8 (pp. 219-222), and 4.2.4.2 (pp. 193-199), Wilson, A. J. C., Ed., Kluwer Academic Publishers, Dordrecht, The Netherlands, 1992.
- [5] Sheldrick, G. M. "**SHELXL-97**", University of Göttingen, Göttingen, Germany, (1998).
- [6] Spek, A. L. "**PLATON**", A Multipurpose Crystallographic Tool, Utrecht University, Utrecht, The Netherlands, (2010).
- [7] L. J. Farrugia, "**WinGX** (Version 1.70.01 January 2005) ", *J. Appl. Cryst.* **1999**, 32, 837-838.
